# Supplementary material for: Cobalt-catalyzed carboxylation of aryl and vinyl chlorides with CO2
Source: Royal Society of Chemistry journal article supplement (doi:10.1039/d0cc06451c), 2020-01-01
Supplement: d0cc06451c1.pdf [file d0cc06451c1.pdf]

## Supporting Information

### **Cobalt-Catalyzed Carboxylation of Aryl and Vinyl Chlorides with CO<sub>2</sub>**

Yanwei Wang,<sup>†</sup> Xiaomei Jiang<sup>†</sup> and Baiquan Wang<sup>\*†,‡</sup>

<sup>†</sup>State Key Laboratory of Elemento-Organic Chemistry, College of Chemistry, Nankai University, Tianjin 300071, People's Republic of China

<sup>‡</sup>State Key Laboratory of Organometallic Chemistry, Shanghai Institute of Organic Chemistry, Chinese Academy of Sciences, Shanghai 200032, People's Republic of China

## Table of Contents

|                                                                                             |         |
|---------------------------------------------------------------------------------------------|---------|
| 1. Table of Contents                                                                        | S1      |
| 2. Experimental Section: General Considerations                                             | S2      |
| 3. Procedures for Preparation of Starting Materials                                         | S2-S3   |
| 4. Optimization Studies                                                                     | S3-S7   |
| 5. Procedures for the Cobalt-Catalyzed Carboxylations                                       | S8      |
| 6. Characterization of the Carboxylation Products                                           | S9-S17  |
| 7. Procedure for 5 mmol of Aryl Chloride Carboxylation                                      | S19     |
| 8. Control Experiment                                                                       | S19-S20 |
| 9. Copies of $^1\text{H}$ , $^{13}\text{C}$ , and $^{19}\text{F}$ NMR Spectra for Compounds | S21-S62 |
| 10. References                                                                              | S63     |

## 2. Experimental Section:

**General Considerations:** All the reactions were carried out under argon atmosphere using standard sealed Schlenk technique.  $^1\text{H}$  NMR (400 MHz),  $^{13}\text{C}$  NMR (101 MHz) and  $^{19}\text{F}$  (376 MHz) were recorded on Bruker AV400 NMR spectrometer with  $\text{CDCl}_3$  and  $\text{DMSO-}d_6$  as solvent. Chemical shifts of  $^1\text{H}$ ,  $^{13}\text{C}$  and  $^{19}\text{F}$  NMR spectra are reported in parts per million (ppm). The residual solvent signals were used as references and the chemical shifts converted to the TMS scale ( $\text{CDCl}_3$ :  $\delta \text{H} = 7.26$  ppm,  $\delta \text{C} = 77.16$  ppm;  $\text{DMSO-}d_6$ :  $\delta \text{H} = 2.50$  ppm,  $\delta \text{C} = 39.43$  ppm). All coupling constants ( $J$  values) were reported in Hertz (Hz). Multiplicities are reported as follows: singlet (s), doublet (d), doublet of doublets (dd), doublet of doublet of doublets (ddd), doublet of triplets (dt), triplet (t), triplet of doublets (td), quartet (q), and multiplet (m). Column chromatography was performed on silica gel 200–300 mesh. Analytical thin-layer chromatography (TLC) was performed on pre-coated, glass-backed silica gel plates. Visualization of the developed chromatogram was performed by UV absorbance (254 nm and 365nm). High-resolution mass spectrometry (HRMS) was done on a FTICR-mass spectrometer. Unless otherwise noted below, all other compounds have been reported in the literature or are commercially available without any further purification.

## 3. Procedures for the Preparation of Substrates.

Aryl chlorides, aryl bromides and 2-chloropropene (**2g**) were purchased without any further purification. Vinyl chlorides (**2a-2f**) were prepared according to the literatures,<sup>1</sup> Vinyl chlorides (**2h, 2i**) were prepared according to the following procedures:<sup>2</sup>

Solution of corresponding ketones (6.0 mmol),  $\text{PCl}_3$  (11.3 mmol) in 20 mL of glacial acetic acid was allowed to stand in stoppered flasks at room temperature for about 5 h. Afterwards, it was evaporated under reduced pressure and the residue was washed with dilute sodium bicarbonate solution. The crude product was collected by gravity filtration and washed with dilute sodium bicarbonate solution. The purification was performed by flash column chromatography on silica gel (eluent: EtOAc/petroleum ether = 1/50 to 1/30).

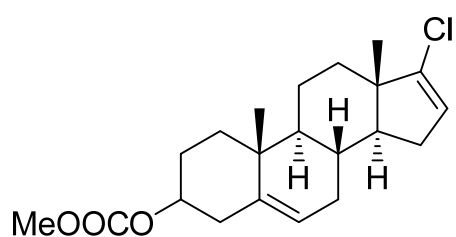

**(8R,9S,10R,13S,14S,17S)-3-Chloro-10,13-dimethyl-2,7,8,9,10,11,12,13,14,15,16,17-dodecahydro-1H-cyclopenta[a]phenanthren-17-yl methyl carbonate**

This compound is isolated as a white solid. M.p.: 133-135 °C.  $^1\text{H NMR}$  ( $\text{CDCl}_3$ , 400 MHz):  $\delta$  6.05 (s, 1H), 5.38 (d,  $J = 3.1$  Hz, 1H), 4.58 – 4.45 (m, 1H), 3.76 (s, 3H), 2.56 – 2.43 (m, 1H), 2.36 – 2.14 (m, 3H), 1.85 (dd,  $J = 12.6, 4.0$  Hz, 2H), 1.73 – 1.57 (m, 5H), 1.46 – 1.28 (m, 3H), 1.23 (td,  $J = 12.9, 4.0$  Hz, 1H), 1.14 – 1.07 (m, 1H), 1.06 – 0.98 (m, 1H), 0.96 (s, 3H), 0.85 (s, 3H).  $^{13}\text{C NMR}$  ( $\text{CDCl}_3$ , 101 MHz): 155.8, 140.6, 130.4, 126.9, 123.6, 86.4, 54.6, 51.0, 47.8, 42.5, 36.6, 34.8, 34.5, 31.5, 31.2, 30.6, 27.4, 23.3, 20.6, 18.9, 11.9. **HRMS (ESI)**: Calcd for  $\text{C}_{21}\text{H}_{29}\text{ClO}_3$   $[\text{M}+\text{Na}]^+$  387.1697, found 387.1698.

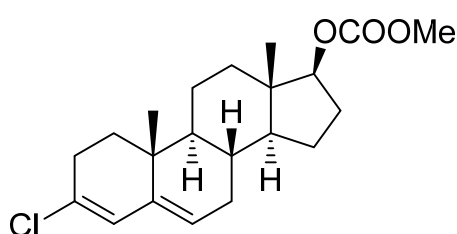

**(8R,9S,10R,13S,14S)-17-Chloro-10,13-dimethyl-2,3,4,7,8,9,10,11,12,13,14,15-dodecahydro-1H-cyclopenta[a]phenanthren-3-yl methyl carbonate**

This compound is isolated as a white solid. M.p.: 168-170 °C.  $^1\text{H NMR}$  ( $\text{CDCl}_3$ , 400 MHz):  $\delta$  5.63 (s, 1H), 5.41 (d,  $J = 4.9$  Hz, 1H), 4.55 – 4.41 (m, 1H), 3.77 (s, 3H), 2.48 – 2.32 (m, 2H), 2.16 (ddd,  $J = 14.8, 6.2, 3.1$  Hz, 1H), 2.06 – 1.77 (m, 5H), 1.71 – 1.59 (m, 4H), 1.58 – 1.45 (m, 2H), 1.34 (td,  $J = 12.6, 4.6$  Hz, 1H), 1.22 – 1.02 (m, 5H), 0.89 (s, 3H).  $^{13}\text{C NMR}$  ( $\text{CDCl}_3$ , 101 MHz): 155.1, 144.6, 139.8, 124.5, 122.3, 77.6, 55.6, 54.5, 50.3, 47.4, 38.0, 36.7, 36.7, 33.6, 31.0, 30.5, 30.5, 27.6, 20.5, 19.1, 14.9. **HRMS (ESI)**: Calcd for  $\text{C}_{21}\text{H}_{29}\text{ClO}_3$   $[\text{M}+\text{Na}]^+$  387.1697, found 387.1699.

#### 4. Optimization studies.

##### The effect of ligands on the carboxylation of aryl chlorides with $\text{CO}_2$

An oven-dried 50 mL schlenk tube containing a stirring bar was charged with  $\text{CoBr}_2$  (5.5 mg, 5.0 mol %), ligand (10.0 mol%), Mn powder (41.2 mg, 0.75 mmol, 1.5 equiv), and LiOAc (1.0 mmol, 66 mg, 2.0 equiv). The schlenk tube was evacuated and back-filled under  $\text{CO}_2$  flow (this procedure was repeated three times). Then, anhydrous DMA (1.0 mL) and 1-chloro-4-methoxybenzene (0.5 mmol, 1.0 equiv.) was added under  $\text{CO}_2$  flow, and the resulting mixture was stirred at 100 °C for 12 h. The mixture was then allowed to cool to

room temperature, carefully quenched with 4 M HCl (in 1,4-dioxane) and stirred for 10 minutes. The crude products were purified by flash chromatography (acetic acid/EtOAc/petroleum ether = 0/1/20 to 0.001/1/4).

**Table S1** The effect of ligands on the carboxylation of aryl chlorides with CO<sub>2</sub>.<sup>a</sup>

---

**L1:** R<sup>1</sup> = R<sup>2</sup> = H  
**L2:** R<sup>1</sup> = Me, R<sup>2</sup> = H  
**L3:** R<sup>1</sup> = *n*Bu, R<sup>2</sup> = H  
**L4:** R<sup>1</sup> = Ph, R<sup>2</sup> = H  
**L5:** R<sup>1</sup> = Me, R<sup>2</sup> = Me  
**L6:** R<sup>1</sup> = *n*Bu, R<sup>2</sup> = Me  
**L7:** R<sup>1</sup> = *n*hex, R<sup>2</sup> = Me

**L8:** R<sup>3</sup> = H  
**L9:** R<sup>3</sup> = *n*Bu

PPh<sub>3</sub>  
**L11**

**L10**

**L12**

---

| Entry    | Ligand (L) | Yield (%) |
|----------|------------|-----------|
| 1        | <b>L1</b>  | trace     |
| 2        | <b>L2</b>  | 10        |
| 3        | <b>L3</b>  | 48        |
| 4        | <b>L4</b>  | 0         |
| 5        | <b>L5</b>  | 57        |
| <b>6</b> | <b>L6</b>  | <b>59</b> |
| 7        | <b>L7</b>  | 49        |
| 8        | <b>L8</b>  | trace     |
| 9        | <b>L9</b>  | 53        |
| 10       | <b>L10</b> | 0         |
| 11       | <b>L11</b> | 0         |
| 12       | <b>L12</b> | 0         |

<sup>a</sup> Reaction conditions: 1-chloro-4-methoxybenzene (0.5 mmol, 1.0 equiv), CO<sub>2</sub> 1 atm, CoBr<sub>2</sub> (5 mol%), ligand (10 mol%), Mn powder (1.5 equiv), LiOAc (2.0 equiv), DMA (1.0 mL), 100 °C for 12 h. Isolated yield.

**Table S2** Optimization of the reaction conditions for the carboxylation of aryl chlorides.<sup>a</sup>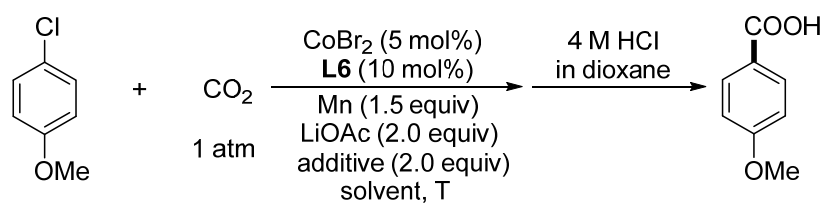

| Entry           | Additive            | T (°C) | Solvent            | Yield (%)                           |
|-----------------|---------------------|--------|--------------------|-------------------------------------|
| 1               |                     | 120    | DMA                | 32                                  |
| 2               |                     | 80     | DMA                | 28                                  |
| 3               |                     | 60     | DMA                | trace                               |
| 4               |                     | RT     | DMA                | 0                                   |
| 5               |                     | 100    | DMF                | 31                                  |
| 6               |                     | 100    | DMSO               | 0                                   |
| 7               |                     | 100    | CH <sub>3</sub> CN | 0                                   |
| 8               | Bu <sub>4</sub> NI  | 100    | DMA                | 66                                  |
| 9               | Et <sub>4</sub> NI  | 100    | DMA                | 71                                  |
| 10              | Et <sub>4</sub> NBr | 100    | DMA                | 65                                  |
| 11              | Et <sub>4</sub> NCl | 100    | DMA                | 0                                   |
| 12 <sup>b</sup> | Et <sub>4</sub> NI  | 100    | DMA                | 19                                  |
| 13 <sup>c</sup> | Et <sub>4</sub> NI  | 100    | DMA                | 34                                  |
| 14 <sup>d</sup> | Et <sub>4</sub> NI  | 100    | DMA                | 59                                  |
| 15 <sup>e</sup> | Et <sub>4</sub> NI  | 100    | DMA                | 0                                   |
| 16              | Et <sub>4</sub> NI  | 100    | DMA                | trace <sup>f</sup> , 0 <sup>g</sup> |
| 17 <sup>h</sup> | Et <sub>4</sub> NI  | 100    | DMA                | 0                                   |
| 18 <sup>i</sup> | Et <sub>4</sub> NI  | 100    | DMA                | 12                                  |
| 19 <sup>j</sup> | Et <sub>4</sub> NI  | 100    | DMA                | 0                                   |

<sup>a</sup> Reaction conditions: 1-chloro-4-methoxybenzene (0.5 mmol, 1.0 equiv), CO<sub>2</sub> 1 atm, CoBr<sub>2</sub> (5 mol%), ligand (10 mol%), Mn powder (1.5 equiv), LiOAc (1.5 equiv), solvent (1.0 mL), 100 °C for 12 h. Isolated yield. <sup>b</sup> NaOAc instead of LiOAc. <sup>c</sup> KOAc instead of LiOAc. <sup>d</sup> Li<sub>2</sub>CO<sub>3</sub> instead of LiOAc. <sup>e</sup> LiCl instead of

LiOAc. <sup>f</sup> Zn powder instead of Mn powder. <sup>g</sup> In powder instead of Mn powder. <sup>h</sup> Co(PPh<sub>3</sub>)<sub>3</sub>Cl (5 mol %) as catalyst, without **L6**. <sup>i</sup> Co(PPh<sub>3</sub>)<sub>3</sub>Cl (5 mol %) as catalyst, with **L6**. <sup>j</sup> Without CoBr<sub>2</sub>.

**Table S3** Investigation Experiments about the Role of LiOAc.<sup>a</sup>

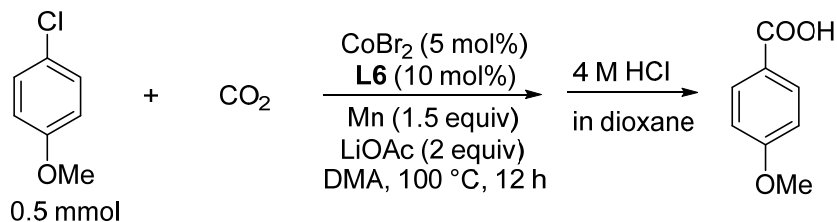

| Entry | Aleration                                                                  | Yield (%) |
|-------|----------------------------------------------------------------------------|-----------|
| 1     | none                                                                       | 59        |
| 2     | LiCl (2 equiv) + NaOAc (2 equiv) instead of LiOAc                          | 51        |
| 3     | LiCl (2 equiv) + KOAc (2 equiv) instead of LiOAc                           | 49        |
| 4     | LiCl (2 equiv) + K <sub>2</sub> CO <sub>3</sub> (2 equiv) instead of LiOAc | 53        |
| 5     | LiCl (2 equiv) + Et <sub>3</sub> N (2 equiv) instead of LiOAc              | 45        |
| 6     | LiCl (2 equiv)                                                             | 0         |

<sup>a</sup> Reaction conditions: 1-chloro-4-methoxybenzene (0.5 mmol, 1.0 equiv), CO<sub>2</sub> 1 atm, CoBr<sub>2</sub> (5 mol%), ligand (10 mol%), Mn powder (1.5 equiv), LiOAc (2.0 equiv), DMA (1.0 mL), 100 °C for 12 h. Isolated yield.

**Table S4** Optimization of the reaction conditions for the carboxylation of aryl bromides.<sup>a</sup>

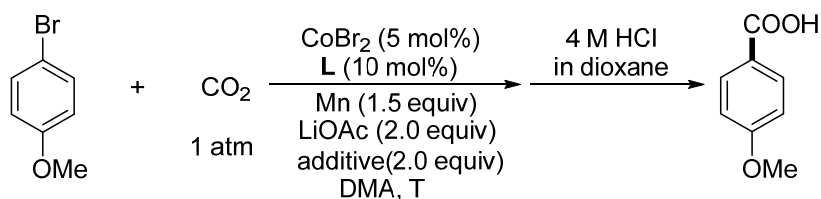

| Entry | Ligand (L) | Additive | T (°C) | Yield (%) |
|-------|------------|----------|--------|-----------|
| 1     | <b>L1</b>  |          | 60     | trace     |
| 2     | <b>L1</b>  |          | 80     | trace     |
| 2     | <b>L1</b>  |          | RT     | 15        |
| 3     | <b>L2</b>  |          | RT     | 75        |
| 4     | <b>L3</b>  |          | RT     | 59        |

|                 |               |                     |    |       |
|-----------------|---------------|---------------------|----|-------|
| 5               | <b>L4</b>     |                     | RT | 0     |
| 6               | <b>L5</b>     |                     | RT | 66    |
| 7               | <b>L6</b>     |                     | RT | 55    |
| 8               | <b>L7</b>     |                     | RT | 55    |
| 9               | <b>L8</b>     |                     | RT | trace |
| 10              | <b>L9</b>     |                     | RT | 53    |
| 11              | <b>L10-12</b> |                     | RT | 0     |
| 12              | <b>L2</b>     | Et <sub>4</sub> NI  | RT | 65    |
| 13              | <b>L2</b>     | Et <sub>4</sub> NBr | RT | 62    |
| 14 <sup>b</sup> |               |                     | RT | 0     |
| 15 <sup>c</sup> | <b>L2</b>     |                     | RT | 59    |

<sup>a</sup> Reaction conditions: 1-bromo-4-methoxybenzene (0.5 mmol, 1.0 equiv), CO<sub>2</sub> 1 atm, CoBr<sub>2</sub> (5 mol%), ligand (10 mol%), Mn powder (1.5 equiv), LiOAc (2.0 equiv), DMA (1.0 mL) for 12 h. Isolated yield. <sup>b</sup> Co(PPh<sub>3</sub>)<sub>3</sub>Cl (10 mol %) as catalyst, without **L2**. <sup>c</sup> Co(PPh<sub>3</sub>)<sub>3</sub>Cl (5 mol %) as catalyst.



## 5. Procedures for the Cobalt-Catalyzed Carboxylation

### General Procedure for the Cobalt-Catalyzed Carboxylation of Aryl Chlorides with CO<sub>2</sub>

An oven-dried 50 mL Schlenk tube containing a stirring bar was charged with CoBr<sub>2</sub> (5.5 mg, 5.0 mol %), **L6** (16 mg, 10.0 mol%), Mn powder (41.2 mg, 0.75mmol, 1.5 equiv), Et<sub>4</sub>NI (257 mg, 2.0 equiv) and LiOAc (1.0 mmol, 66 mg, 2.0 equiv). The Schlenk tube was evacuated and back-filled under CO<sub>2</sub> flow (this procedure was repeated three times). Then, anhydrous DMA (1.0 mL) and aryl chlorides (0.5 mmol, 1.0 equiv) was added under CO<sub>2</sub> flow, and the resulting mixture was stirred at 100 °C for 12 h. The mixture was then allowed to cool to room temperature, carefully quenched with 4 M HCl (in 1,4-dioxane) and stirred for 10 minutes. The crude products were purified by flash chromatography (acetic acid/EtOAc/petroleum ether = 0/1/20 to 0.001/1/4).

### General Procedure for the Cobalt-Catalyzed Carboxylation of Aryl Bromides with CO<sub>2</sub>

An oven-dried 50 mL Schlenk tube containing a stirring bar was charged with CoBr<sub>2</sub> (5.5 mg, 10.0 mol %), **L2** (10.4 mg, 10.0 mol%), Mn powder (41.2 mg, 0.75mmol, 1.5 equiv), and LiOAc (1.0 mmol, 66 mg, 2.0 equiv). The Schlenk tube was evacuated and back-filled under CO<sub>2</sub> flow (this procedure was repeated three times). Then, anhydrous DMA (1.0 mL) and aryl bromides (0.5 mmol, 1.0 equiv) was added under CO<sub>2</sub> flow, and the resulting mixture was stirred at room temperature for 12 h. Then, the mixture was carefully quenched with 4 M HCl (in 1,4-dioxane) and stirred for 10 minutes. The crude products were purified by flash chromatography (acetic acid/EtOAc/petroleum ether = 0/1/20 to 0.001/1/4).

## 6. Characterization of the Carboxylation Products

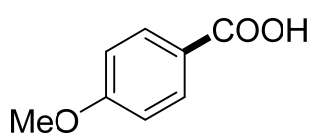

### 4-Methoxybenzoic acid (1)

The title compound was isolated as a white solid, 54 mg, 71% (from 1-chloro-4-methoxybenzene); 57 mg, 75% (from 1-bromo-4-methoxybenzene).  $^1\text{H NMR}$  ( $\text{DMSO-}d_6$ , 400 MHz):  $\delta$  12.64 (s, 1H), 7.89 (d,  $J = 8.7$  Hz, 2H), 7.01 (d,  $J = 8.7$  Hz, 2H), 3.82 (s, 3H).  $^{13}\text{C NMR}$  ( $\text{DMSO-}d_6$ , 101 MHz):  $\delta$  167.0, 162.8, 131.3, 122.9, 113.8, 55.4. Spectroscopic data for **1** match those previously reported in the literature.<sup>1</sup>

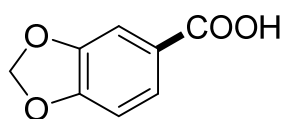

### Benzo[*d*][1,3]dioxole-5-carboxylic acid (2)

The title compound was isolated as a white solid, 62.3 mg, 75% (from 5-chlorobenzo[*d*][1,3]dioxole); 67.2 mg, 81% (from 5-bromobenzo[*d*][1,3]dioxole).  $^1\text{H NMR}$  ( $\text{DMSO-}d_6$ , 400 MHz):  $\delta$  12.77 (s, 1H), 7.54 (d,  $J = 6.6$  Hz, 1H), 7.36 (s, 1H), 7.00 (d,  $J = 8.1$  Hz, 1H), 6.12 (s, 2H).  $^{13}\text{C NMR}$  ( $\text{DMSO-}d_6$ , 101 MHz):  $\delta$  166.6, 151.1, 147.4, 124.9, 124.6, 108.7, 108.0, 101.9. Spectroscopic data for **2** match those previously reported in the literature.<sup>6</sup>

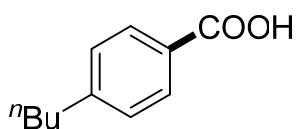

### 4-Butylbenzoic acid (3)

The title compound was isolated as a white solid, 68.5 mg, 77% (from 1-chloro-4-butylbenzene); 72.1 mg, 81% (from 1-bromo-4-butylbenzene).  $^1\text{H NMR}$  ( $\text{DMSO-}d_6$ , 400 MHz):  $\delta$  12.77 (s, 1H), 7.85 (d,  $J = 7.9$  Hz, 2H), 7.30 (d,  $J = 7.8$  Hz, 2H), 2.63 (t,  $J = 7.5$  Hz, 2H), 1.64 – 1.49 (m, 2H), 1.36 – 1.23 (m, 2H), 0.88 (t,  $J = 7.3$  Hz, 3H).  $^{13}\text{C NMR}$  ( $\text{DMSO-}d_6$ , 101 MHz):  $\delta$  167.2, 147.6, 129.3, 128.4, 128.2, 34.7, 32.7, 21.6, 13.6. Spectroscopic data for **3** match those previously reported in the literature.<sup>1</sup>

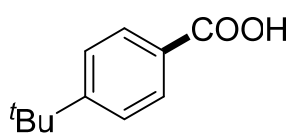

### 4-(*tert*-Butyl)benzoic acid (4)

The title compound was isolated as a white solid, 65 mg, 73% (from 1-chloro-4-(*tert*-butyl)benzene); 71.2 mg, 80% (from 1-bromo-4-(*tert*-butyl)benzene).  $^1\text{H NMR}$  ( $\text{DMSO-}d_6$ , 400 MHz):  $\delta$  12.78 (s, 1H), 7.87 (d,  $J = 8.3$  Hz, 2H), 7.51 (d,  $J = 8.2$  Hz, 2H), 1.29 (s, 9H).  $^{13}\text{C NMR}$  ( $\text{DMSO-}d_6$ , 101 MHz):  $\delta$  167.1, 155.7, 129.1,

127.9, 125.2, 34.7, 30.8. Spectroscopic data for **4** match those previously reported in the literature.<sup>1</sup>

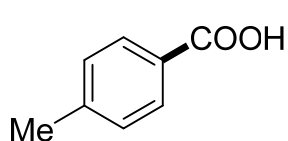

#### 4-Methylbenzoic acid (**5**)

The title compound was isolated as a white solid, 49.6 mg, 73% (from 1-chloro-4-methylbenzene); 51 mg, 75% (from 1-bromo-4-methylbenzene). <sup>1</sup>H NMR (DMSO-*d*<sub>6</sub>, 400 MHz): δ 12.79 (s, 1H), 7.83 (d, *J* = 7.9 Hz, 2H), 7.29 (d, *J* = 7.7 Hz, 2H), 2.36 (s, 3H). <sup>13</sup>C NMR (DMSO-*d*<sub>6</sub>, 101 MHz): δ 167.2, 142.9, 129.2, 129.0, 127.9, 21.0. Spectroscopic data for **5** match those previously reported in the literature.<sup>6</sup>

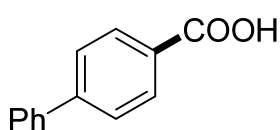

#### [1,1'-Biphenyl]-4-carboxylic acid (**6**)

The title compound was isolated as a white solid, 72.3 mg, 73% (from 4-chloro-1,1'-biphenyl); 67.3 mg, 68% (from 4-bromo-1,1'-biphenyl). <sup>1</sup>H NMR (DMSO-*d*<sub>6</sub>, 400 MHz): δ 13.00 (s, 1H), 8.03 (d, *J* = 7.9 Hz, 2H), 7.80 (d, *J* = 8.0 Hz, 2H), 7.73 (d, *J* = 7.5 Hz, 2H), 7.50 (t, *J* = 7.3 Hz, 2H), 7.46 – 7.39 (m, 1H). <sup>13</sup>C NMR (DMSO-*d*<sub>6</sub>, 101 MHz): δ 167.1, 144.3, 139.0, 129.9, 129.5, 129.0, 128.3, 126.9, 126.8. Spectroscopic data for **6** match those previously reported in the literature.<sup>6</sup>

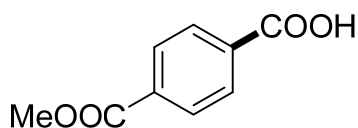

#### 4-(Methoxycarbonyl)benzoic acid (**7**)

The title compound was isolated as a white solid, 60.3 mg, 67% (from methyl 4-chlorobenzoate); 55.8 mg, 62% (from methyl 4-bromobenzoate). <sup>1</sup>H NMR (DMSO-*d*<sub>6</sub>, 400 MHz): δ 13.34 (s, 1H), 8.06 (s, 4H), 3.88 (s, 3H). <sup>13</sup>C NMR (DMSO-*d*<sub>6</sub>, 101 MHz): δ 166.5, 165.5, 134.7, 133.1, 129.5, 129.3, 52.4. Spectroscopic data for **7** match those previously reported in the literature.<sup>1</sup>

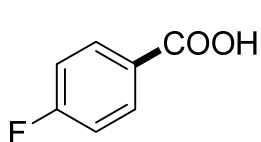

#### 4-Fluorobenzoic acid (**8**)

The title compound was isolated as a white solid, 43.4 mg, 62% (from 1-chloro-4-fluorobenzene); 47.6 mg, 68% (from 1-bromo-4-fluorobenzene). <sup>1</sup>H NMR (DMSO-*d*<sub>6</sub>, 400 MHz): δ 13.05 (s, 1H), 8.00 (s, 2H), 7.31 (s, 2H). <sup>13</sup>C NMR (DMSO-*d*<sub>6</sub>, 101 MHz): δ 166.3, 164.9 (d, *J* = 250.4 Hz), 132.0 (d, *J* = 9.4 Hz), 127.3, 115.5 (d, *J* = 22.1 Hz). <sup>19</sup>F NMR (DMSO-*d*<sub>6</sub>, 376 MHz): δ -106.90. Spectroscopic data for **8** match those previously reported in the literature.<sup>1</sup>

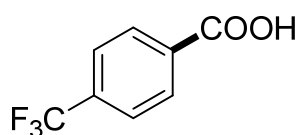

#### 4-(Trifluoromethyl)benzoic acid (9)

The title compound was isolated as a white solid, 65.6 mg, 69% (from 1-chloro-4-(trifluoromethyl)benzene); 55.1 mg, 58% (from 1-bromo-4-(trifluoromethyl)benzene).  $^1\text{H NMR}$  (DMSO- $d_6$ , 400 MHz):  $\delta$  13.48 (s, 1H), 8.13 (d,  $J = 7.8$  Hz, 2H), 7.87 (d,  $J = 8.0$  Hz, 2H).  $^{13}\text{C NMR}$  (DMSO- $d_6$ , 101 MHz):  $\delta$  166.6, 135.0, 132.9 (q,  $J = 31.6$  Hz), 130.5, 126.0 (q,  $J = 3.6$  Hz), 124.2 (q,  $J = 272.6$  Hz).  $^{19}\text{F NMR}$  (DMSO- $d_6$ , 376 MHz):  $\delta$  -61.58. Spectroscopic data for **9** match those previously reported in the literature.<sup>1</sup>

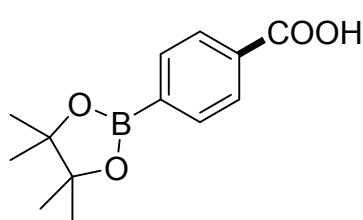

#### 4-(4,4,5,5-Tetramethyl-1,3,2-dioxaborolan-2-yl)benzoic acid (10)

The title compound was isolated as a white solid, 79.4 mg, 64% (from 2-(4-chlorophenyl)-4,4,5,5-tetramethyl-1,3,2-dioxaborolane); 62 mg, 50% (from 2-(4-bromophenyl)-4,4,5,5-tetramethyl-1,3,2-dioxaborolane).  $^1\text{H NMR}$  (DMSO- $d_6$ , 400 MHz):  $\delta$  13.09 (s, 1H), 7.94 (d,  $J = 7.5$  Hz, 2H), 7.78 (d,  $J = 8.1$  Hz, 2H), 1.30 (d,  $J = 1.2$  Hz, 12H).  $^{13}\text{C NMR}$  (DMSO- $d_6$ , 101 MHz):  $\delta$  167.1, 134.4, 133.1, 128.5, 83.9, 24.6. Spectroscopic data for **10** match those previously reported in the literature.<sup>1</sup>

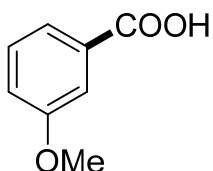

#### 3-Methoxybenzoic acid (11)

The title compound was isolated as a white solid, 62.3 mg, 82% (from 1-chloro-3-methoxybenzene); 50.2 mg, 66% (from 1-bromo-3-methoxybenzene).  $^1\text{H NMR}$  (DMSO- $d_6$ , 400 MHz):  $\delta$  13.00 (s, 1H), 7.53 (d,  $J = 7.6$  Hz, 1H), 7.45 – 7.37 (m, 2H), 7.18 (dd,  $J = 8.2, 1.9$  Hz, 1H), 3.79 (s, 3H).  $^{13}\text{C NMR}$  (DMSO- $d_6$ , 101 MHz):  $\delta$  167.1, 159.2, 132.1, 130.0, 121.5, 118.9, 113.8, 55.2. Spectroscopic data for **11** match those previously reported in the literature.<sup>3</sup>

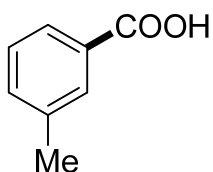

#### 3-Methylbenzoic acid (12)

The title compound was isolated as a white solid, 42.8 mg, 63% (from 1-chloro-3-methylbenzene); 59.8 mg, 88% (from 1-bromo-3-methylbenzene).  $^1\text{H NMR}$  (DMSO- $d_6$ , 400 MHz):  $\delta$  12.88 (s, 1H), 7.83 – 7.67 (m, 2H), 7.51 – 7.27 (m, 2H), 2.35 (s, 3H).  $^{13}\text{C NMR}$  (DMSO- $d_6$ , 101 MHz):  $\delta$  167.4, 137.9, 133.4, 130.7, 129.7, 128.4, 126.4, 20.8. Spectroscopic data for **12** match those previously reported in the literature.<sup>4</sup>

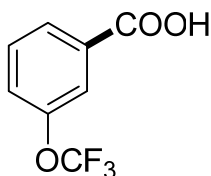

### 3-(Trifluoromethoxy)benzoic acid (13)

The title compound was isolated as a white solid, 65.9 mg, 64% (from 1-chloro-3-(trifluoromethoxy)benzene); 87.6 mg, 85% (from 1-bromo-3-(trifluoromethoxy)benzene).  $^1\text{H NMR}$  (DMSO- $d_6$ , 400 MHz):  $\delta$  13.43 (s, 1H), 8.03 – 7.93 (m, 1H), 7.80 (s, 1H), 7.72 – 7.55 (m, 2H).  $^{13}\text{C NMR}$  (DMSO- $d_6$ , 101 MHz):  $\delta$  165.9, 148.3, 133.1, 130.8, 128.3, 125.4, 121.2, 120.0 (q,  $J = 256.5$  Hz).  $^{19}\text{F NMR}$  (DMSO- $d_6$ , 376 MHz):  $\delta$  -57.0. Spectroscopic data for **13** match those previously reported in the literature.<sup>5</sup>

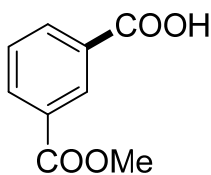

### 3-(Methoxycarbonyl)benzoic acid (14)

The title compound was isolated as a white solid, 67.5 mg, 75% (from methyl 3-chlorobenzoate); 59.4 mg, 66% (from methyl 3-bromobenzoate).  $^1\text{H NMR}$  (DMSO- $d_6$ , 400 MHz):  $\delta$  13.32 (s, 1H), 8.47 (s, 1H), 8.21 – 8.14 (m, 2H), 7.66 (t,  $J = 7.8$  Hz, 1H), 3.88 (s, 3H).  $^{13}\text{C NMR}$  (DMSO- $d_6$ , 101 MHz):  $\delta$  166.4, 165.5, 133.7, 133.2, 131.3, 130.0, 129.7, 129.3, 52.4. Spectroscopic data for **14** match those previously reported in the literature.<sup>6</sup>

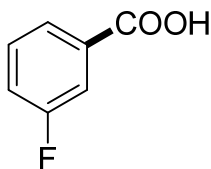

### 3-Fluorobenzoic acid (15)

The title compound was isolated as a white solid, 49.7 mg, 71% (from 1-chloro-3-fluorobenzene); 44.8 mg, 64% (from 1-bromo-3-fluorobenzene).  $^1\text{H NMR}$  (DMSO- $d_6$ , 400 MHz):  $\delta$  13.28 (s, 1H), 7.78 (d,  $J = 7.6$  Hz, 1H), 7.65 (d,  $J = 9.4$  Hz, 1H), 7.59 – 7.52 (m, 1H), 7.51 – 7.42 (m, 1H).  $^{13}\text{C NMR}$  (DMSO- $d_6$ , 101 MHz):  $\delta$  166.1, 161.9 (d,  $J = 244.5$  Hz), 133.2 (d,  $J = 7.3$  Hz), 130.7 (d,  $J = 7.9$  Hz), 125.3 (d,  $J = 2.8$  Hz), 119.7 (d,  $J = 21.1$  Hz), 115.6 (d,  $J = 22.7$  Hz).  $^{19}\text{F NMR}$  (DMSO- $d_6$ , 376 MHz):  $\delta$  -112.6. Spectroscopic data for **15** match those previously reported in the literature.<sup>4</sup>

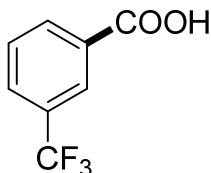

### 3-(Trifluoromethyl)benzoic acid (16)

The title compound was isolated as a white solid, 62.7 mg, 66% (from 1-chloro-3-(trifluoromethyl)benzene); 62.7 mg, 66% (from 1-bromo-3-(trifluoromethyl)benzene).  $^1\text{H NMR}$  (DMSO- $d_6$ , 400 MHz):  $\delta$  13.51 (s, 1H), 8.22 (d,  $J = 7.7$  Hz, 1H), 8.17 (s, 1H), 7.98 (d,  $J = 6.3$  Hz, 1H), 7.80 – 7.71 (m, 1H).  $^{13}\text{C NMR}$  (DMSO- $d_6$ , 101 MHz):  $\delta$  166.0, 133.1, 131.9, 130.0, 129.4 (q,  $J = 32.1$  Hz), 129.3 (q,  $J = 3.5$

Hz), 125.4 (q,  $J = 3.8$  Hz), 123.7 (q,  $J = 272.4$  Hz).  $^{19}\text{F}$  NMR (DMSO- $d_6$ , 376 MHz):  $\delta$  -61.4. Spectroscopic data for **16** match those previously reported in the literature.<sup>3</sup>

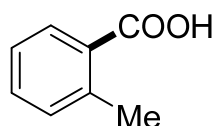

**2-Methylbenzoic acid (17)**

The title compound was isolated as a white solid, 41.5 mg, 61% (from 1-chloro-2-methylbenzene); 57.8 mg, 85% (from 1-bromo-2-methylbenzene).  $^1\text{H}$  NMR (DMSO- $d_6$ , 400 MHz):  $\delta$  12.81 (s, 1H), 7.82 (d,  $J = 7.6$  Hz, 1H), 7.44 (t,  $J = 7.3$  Hz, 1H), 7.34 – 7.23 (m, 2H), 2.52 (s, 3H).  $^{13}\text{C}$  NMR (DMSO- $d_6$ , 101 MHz):  $\delta$  169.1, 139.5, 132.2, 132.0, 130.9, 130.7, 126.3, 21.7. Spectroscopic data for **17** match those previously reported in the literature.<sup>6</sup>

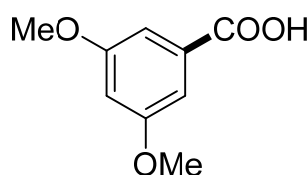

**3,5-dimethoxybenzoic acid (18)**

The title compound was isolated as a white solid, 60.1 mg, 66% (from 1-chloro-3,5-dimethoxybenzene); 54.6 mg, 60% (from 1-bromo-3,5-dimethoxybenzene).  $^1\text{H}$  NMR (DMSO- $d_6$ , 400 MHz):  $\delta$  12.99 (s, 1H), 7.06 (d,  $J = 2.3$  Hz, 2H), 6.73 (t,  $J = 2.2$  Hz, 1H), 3.79 (s, 6H).  $^{13}\text{C}$  NMR (DMSO- $d_6$ , 101 MHz):  $\delta$  166.9, 160.3, 132.8, 106.8, 104.8, 55.3. Spectroscopic data for **18** match those previously reported in the literature.<sup>7</sup>

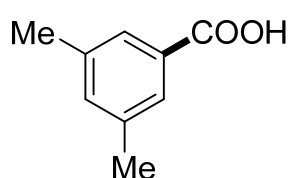

**3,5-Dimethylbenzoic acid (19)**

The title compound was isolated as a white solid, 63 mg, 84% (from 1-chloro-3,5-dimethylbenzene); 62.3 mg, 83% (from 1-bromo-3,5-dimethylbenzene).  $^1\text{H}$  NMR (DMSO- $d_6$ , 400 MHz):  $\delta$  12.78 (s, 1H), 7.55 (s, 2H), 7.22 (s, 1H), 2.31 (s, 6H).  $^{13}\text{C}$  NMR (DMSO- $d_6$ , 101 MHz):  $\delta$  167.5, 137.6, 134.1, 130.6, 126.9, 20.6. Spectroscopic data for **19** match those previously reported in the literature.<sup>8</sup>

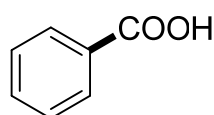

**Benzoic acid (20)**

The title compound was isolated as a white solid, 41.5 mg, 68% (from chlorobenzene); 39.7 mg, 65% (from bromobenzene).  $^1\text{H}$  NMR (DMSO- $d_6$ , 400 MHz):  $\delta$  12.96 (s, 1H), 7.95 (d,  $J = 7.3$  Hz, 2H), 7.61 (t,  $J = 7.0$  Hz, 1H), 7.49 (t,  $J = 7.3$  Hz, 2H).  $^{13}\text{C}$  NMR (DMSO- $d_6$ , 101 MHz):  $\delta$  167.3, 132.8, 130.7, 129.2, 128.5. Spectroscopic data for **1** match those previously reported in the literature.<sup>6</sup>

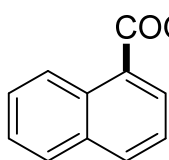**1-Naphthoic acid (21)**

The title compound was isolated as a white solid, 62.8 mg, 73% (from 1-chloronaphthalene); 58.5 mg, 68% (from 1-bromonaphthalene).  $^1\text{H NMR}$  ( $\text{DMSO-}d_6$ , 400 MHz):  $\delta$  13.15 (s, 1H), 8.88 (d,  $J = 8.5$  Hz, 1H), 8.23 – 8.10 (m, 2H), 8.01 (d,  $J = 8.0$  Hz, 1H), 7.67 – 7.55 (m, 3H).  $^{13}\text{C NMR}$  ( $\text{DMSO-}d_6$ , 101 MHz):  $\delta$  168.6, 133.4, 132.8, 130.6, 129.8, 128.5, 127.6, 127.5, 126.1, 125.4, 124.8. Spectroscopic data for **21** match those previously reported in the literature.<sup>3</sup>

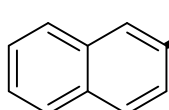**2-Naphthoic acid (22)**

The title compound was isolated as a white solid, 49.9 mg, 58% (from 2-chloronaphthalene); 47.3 mg, 55% (from 2-bromonaphthalene).  $^1\text{H NMR}$  ( $\text{DMSO-}d_6$ , 400 MHz):  $\delta$  13.09 (s, 1H), 8.62 (s, 1H), 8.11 (d,  $J = 8.0$  Hz, 1H), 8.05 – 7.94 (m, 3H), 7.70 – 7.56 (m, 2H).  $^{13}\text{C NMR}$  ( $\text{DMSO-}d_6$ , 101 MHz):  $\delta$  167.9, 135.4, 132.6, 131.0, 129.8, 128.8, 128.6, 128.5, 128.1, 127.3, 125.6. Spectroscopic data for **22** match those previously reported in the literature.<sup>3</sup>

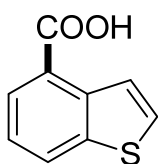**Benzo[*b*]thiophene-4-carboxylic acid (23)**

The title compound was isolated as a white solid, 58.7 mg, 66% (from 4-chlorobenzo[*b*]thiophene); 55.2 mg, 62% (from 4-bromobenzo[*b*]thiophene).  $^1\text{H NMR}$  ( $\text{DMSO-}d_6$ , 400 MHz):  $\delta$  13.14 (s, 1H), 8.28 (d,  $J = 7.9$  Hz, 1H), 8.17 (d,  $J = 5.5$  Hz, 1H), 8.06 (d,  $J = 7.4$  Hz, 1H), 7.95 (d,  $J = 5.5$  Hz, 1H), 7.47 (t,  $J = 7.7$  Hz, 1H).  $^{13}\text{C NMR}$  ( $\text{DMSO-}d_6$ , 101 MHz):  $\delta$  167.6, 140.7, 138.3, 129.8, 127.5, 127.4, 125.2, 124.1, 123.7. Spectroscopic data for **23** match those previously reported in the literature.<sup>8</sup>

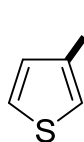**Thiophene-3-carboxylic acid (24)**

The title compound was isolated as a white solid, 32.6 mg, 51% (from 3-chlorothiophene); 41.6 mg, 65% (from 3-bromothiophene).  $^1\text{H NMR}$  ( $\text{DMSO-}d_6$ , 400 MHz):  $\delta$  12.71 (s, 1H), 8.26 (s, 1H), 7.65 – 7.55 (m, 1H), 7.42 (d,  $J = 4.7$  Hz, 1H).  $^{13}\text{C NMR}$  ( $\text{DMSO-}d_6$ , 101 MHz):  $\delta$  164.0, 134.8, 133.8, 128.2, 127.7. Spectroscopic data for **24** match those previously reported in the literature.<sup>3</sup>

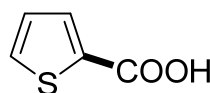**Thiophene-2-carboxylic acid (25)**

The title compound was isolated as a white solid, 22.4 mg, 35% (from 2-chlorothiophene); 14.7 mg, 23% (from 2-bromothiophene).  $^1\text{H NMR}$  ( $\text{DMSO-}d_6$ , 400 MHz):

$\delta$  13.04 (s, 1H), 7.88 (d,  $J$  = 3.9 Hz, 1H), 7.73 (d,  $J$  = 2.6 Hz, 1H), 7.23 – 7.15 (t, 1H).  $^{13}\text{C}$  NMR (DMSO- $d_6$ , 101 MHz):  $\delta$  162.8, 134.6, 133.2, 133.1, 128.1. Spectroscopic data for **25** match those previously reported in the literature.<sup>3</sup>

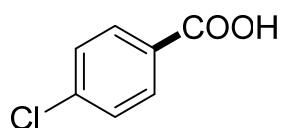

**4-Chlorobenzoic acid (26)**

The title compound was isolated as a white solid, 46.8 mg, 60%.  $^1\text{H}$  NMR (DMSO- $d_6$ , 400 MHz):  $\delta$  13.18 (s, 1H), 7.94 (d,  $J$  = 8.3 Hz, 2H), 7.56 (d,  $J$  = 8.3 Hz, 2H).  $^{13}\text{C}$  NMR (DMSO- $d_6$ , 101 MHz):  $\delta$  166.4, 137.7, 131.1, 129.6, 128.7. Spectroscopic data for **26** match those previously reported in the literature.<sup>3</sup>

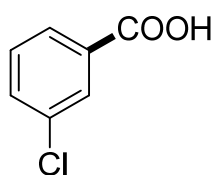

**3-Chlorobenzoic acid (27)**

The title compound was isolated as a white solid, 49.9 mg, 64%.  $^1\text{H}$  NMR (DMSO- $d_6$ , 400 MHz):  $\delta$  13.27 (s, 1H), 7.89 (s, 2H), 7.69 (d,  $J$  = 7.8 Hz, 1H), 7.53 (t,  $J$  = 8.0 Hz, 1H).  $^{13}\text{C}$  NMR (DMSO- $d_6$ , 101 MHz):  $\delta$  166.0, 133.3, 132.8, 132.6, 130.6, 128.8, 127.8. Spectroscopic data for **27** match those previously reported in the literature.<sup>3</sup>

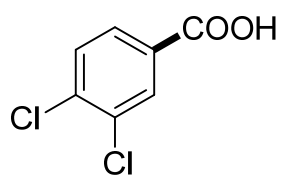

**3,4-Dichlorobenzoic acid (28)**

The title compound was isolated as a white solid, 66.5 mg, 70%.  $^1\text{H}$  NMR (DMSO- $d_6$ , 400 MHz):  $\delta$  13.48 (s, 1H), 8.05 (d,  $J$  = 1.9 Hz, 1H), 7.87 (dd,  $J$  = 8.4, 2.0 Hz, 1H), 7.76 (d,  $J$  = 8.4 Hz, 1H).  $^{13}\text{C}$  NMR (DMSO- $d_6$ , 101 MHz):  $\delta$  165.3, 135.7, 131.4, 131.3, 130.9, 130.8, 129.2. Spectroscopic data for **28** match those previously reported in the literature.<sup>9</sup>

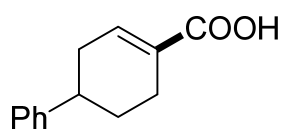

**1,2,3,6-tetrahydro-[1,1'-biphenyl]-4-carboxylic acid (29)**

The title compound was isolated as a white solid, 74.7 mg, 74%.  $^1\text{H}$  NMR (DMSO- $d_6$ , 400 MHz):  $\delta$  12.17 (s, 1H), 7.36 – 7.16 (m, 5H), 6.95 (s, 1H), 2.73 (d,  $J$  = 8.9 Hz, 1H), 2.51 (s, 1H), 2.47 – 2.32 (m, 2H), 2.33 – 2.19 (m, 2H), 1.89 (d,  $J$  = 11.2 Hz, 1H), 1.78 – 1.61 (m, 1H).  $^{13}\text{C}$  NMR (DMSO- $d_6$ , 101 MHz):  $\delta$  167.9, 145.9, 138.3, 130.1, 128.3, 126.6, 126.0, 38.3, 33.0, 29.0, 24.5. HRMS (ESI): Calcd for  $\text{C}_{13}\text{H}_{14}\text{O}_2$  [M-H] $^-$  201.0921, found 201.0918. Spectroscopic data for **29** match those previously reported in the literature.<sup>1</sup>



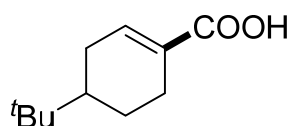

**4-(*tert*-Butyl)cyclohex-1-ene-1-carboxylic acid (30)**

The title compound was isolated as a white solid, 69.7 mg, 83%.  $^1\text{H}$

**NMR (DMSO- $d_6$ , 400 MHz):**  $\delta$  12.04 (s, 1H), 6.90 – 6.80 (m, 1H), 2.37 (d,  $J$  = 17.6 Hz, 1H), 2.19 (d,  $J$  = 18.9 Hz, 1H), 2.06 – 1.79 (m, 3H), 1.24 – 1.15 (m, 1H), 1.09 – 0.97 (m, 1H), 0.85 (s, 9H).  $^{13}\text{C}$  **NMR (DMSO- $d_6$ , 101 MHz):**  $\delta$  168.5, 139.6, 130.6, 43.2, 32.3, 27.4, 25.7, 23.7. Spectroscopic data for **30** match those previously reported in the literature.<sup>10</sup>

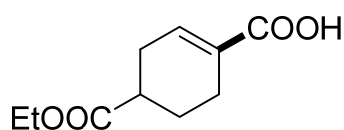

**4-(Ethoxycarbonyl)cyclohex-1-ene-1-carboxylic acid (31)**

The title compound was isolated as a white solid, 75.2 mg, 76%.

$^1\text{H}$  **NMR (DMSO- $d_6$ , 400 MHz):**  $\delta$  12.21 (s, 1H), 6.84 (s, 1H), 4.18 – 3.98 (m, 2H), 2.57 – 2.50 (m, 1H), 2.46 – 2.22 (m, 3H), 2.22 – 2.08 (m, 1H), 2.03 – 1.89 (m, 1H), 1.65 – 1.52 (m, 1H), 1.19 (t,  $J$  = 7.0 Hz, 3H).  $^{13}\text{C}$  **NMR (DMSO- $d_6$ , 101 MHz):**  $\delta$  164.5, 155.6, 142.8, 135.2, 130.0, 127.9, 75.8, 53.6, 47.1, 45.5, 40.8, 34.2, 31.4, 26.4, 23.5, 22.0, 21.6, 20.7, 16.4. Spectroscopic data for **31** match those previously reported in the literature.<sup>10</sup>

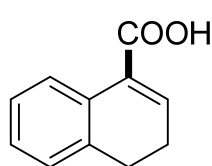

**3,4-Dihydronaphthalene-1-carboxylic acid (32)**

The title compound was isolated as a white solid, 45.6 mg, 57%.  $^1\text{H}$  **NMR**

**(DMSO- $d_6$ , 400 MHz):**  $\delta$  12.59 (s, 1H), 7.76 (d,  $J$  = 5.0 Hz, 1H), 7.15 (d,  $J$  = 28.2 Hz, 4H), 2.76 – 2.62 (m, 2H), 2.34 (s, 2H).  $^{13}\text{C}$  **NMR (DMSO- $d_6$ , 101 MHz):**  $\delta$  167.3, 139.5, 136.0, 130.8, 130.4, 127.4, 127.3, 126.1, 125.7, 26.8, 22.9. Spectroscopic data for **32** match those previously reported in the literature.<sup>10</sup>

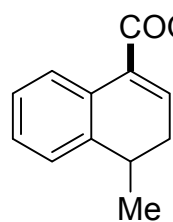

**4-Methyl-3,4-dihydronaphthalene-1-carboxylic acid (33)**

The title compound was isolated as a white solid, 51.7 mg, 55%.  $^1\text{H}$  **NMR**

**(DMSO- $d_6$ , 400 MHz):**  $\delta$  12.61 (s, 1H), 7.86 – 7.74 (m, 1H), 7.22 (s, 3H), 7.05 (t,  $J$  = 4.5 Hz, 1H), 2.95 – 2.81 (m, 1H), 2.54 – 2.48 (m, 1H), 2.27 – 2.13 (m, 1H), 1.16 (d,  $J$  = 6.9 Hz, 3H).  $^{13}\text{C}$  **NMR (DMSO- $d_6$ , 101 MHz):**  $\delta$  167.4, 140.8, 138.0, 129.9, 127.7, 126.0, 30.9, 30.6, 19.7. Spectroscopic data for **33** match those previously reported in the literature.<sup>11</sup>

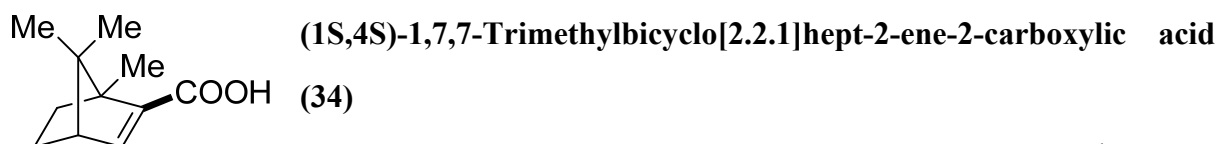

The title compound was isolated as a white solid, 63 mg, 70%. <sup>1</sup>H NMR (DMSO-*d*<sub>6</sub>, 400 MHz): δ 11.88 (s, 1H), 6.80 (d, *J* = 3.3 Hz, 1H), 2.42 (t, *J* = 3.5 Hz, 1H), 1.94 – 1.82 (m, 1H), 1.60 – 1.51 (m, 1H), 1.16 (s, 3H), 1.04 – 0.97 (m, 1H), 0.94 – 0.88 (m, 1H), 0.74 (d, *J* = 8.6 Hz, 6H). <sup>13</sup>C NMR (DMSO-*d*<sub>6</sub>, 101 MHz): δ 166.0, 145.6, 141.0, 56.1, 53.2, 51.2, 30.8, 24.2, 19.1, 18.8, 11.8. Spectroscopic data for **34** match those previously reported in the literature.<sup>1</sup>

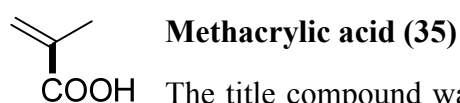

The title compound was isolated as a colorless liquid, 29.2 mg, 68%. <sup>1</sup>H NMR (CDCl<sub>3</sub>, 400 MHz): δ 6.25 (s, 1H), 5.68 (s, 1H), 1.96 (s, 3H). <sup>13</sup>C NMR (CDCl<sub>3</sub>, 101 MHz): δ 172.9, 135.7, 127.8, 17.8. Spectroscopic data for **35** match those previously reported in the literature.<sup>12</sup>

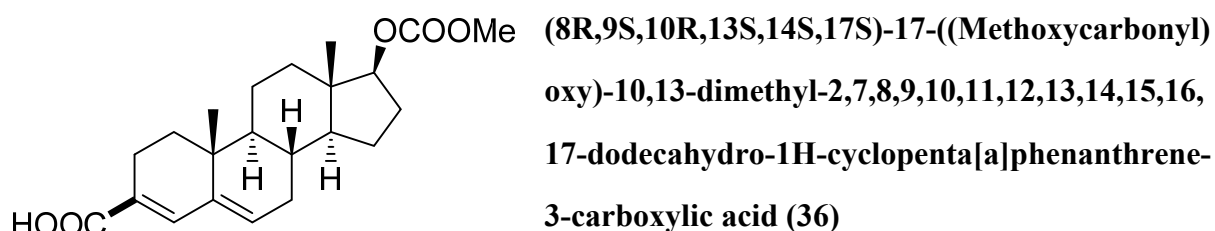

The title compound was isolated as a white solid, 134.6 mg, 72%, M.p.: 201-203 °C. <sup>1</sup>H NMR (DMSO-*d*<sub>6</sub>, 400 MHz): δ 12.12 (s, 1H), 6.92 (s, 1H), 5.83 (s, 1H), 4.47 – 4.41 (m, 1H), 3.67 (s, 3H), 2.38 (dd, *J* = 18.3, 4.7 Hz, 1H), 2.28 – 2.08 (m, 3H), 1.84 (dd, *J* = 12.7, 4.3 Hz, 1H), 1.74 – 1.55 (m, 5H), 1.40 – 1.30 (m, 2H), 1.26 – 1.09 (m, 3H), 1.08 – 0.96 (m, 2H), 0.85 (s, 3H), 0.77 (s, 3H). <sup>13</sup>C NMR (DMSO-*d*<sub>6</sub>, 101 MHz): δ 168.3, 155.0, 140.6, 137.2, 130.8, 126.0, 85.5, 54.3, 50.0, 47.3, 42.0, 36.0, 34.1, 32.9, 31.1, 30.9, 26.9, 22.7, 21.4, 20.06, 18.6, 11.7. HRMS (ESI): Calcd for C<sub>22</sub>H<sub>30</sub>O<sub>5</sub> [M-H]<sup>-</sup> 373.2020, found 373.2018.

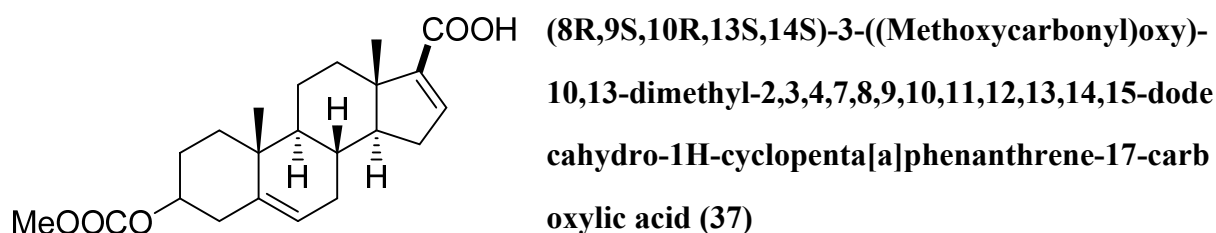

The title compound was isolated as a white solid, 108.5 mg, 58%, M.p.: 209-211 °C. <sup>1</sup>H NMR (DMSO-*d*<sub>6</sub>, 400 MHz): δ 12.03 (s, 1H), 6.69 – 6.61 (m, 1H), 5.38 (d, *J* = 4.8 Hz, 1H), 4.40 –

4.26 (m, 1H), 3.67 (s, 3H), 2.42 – 2.15 (m, 4H), 2.08 (s, 1H), 2.05 – 1.93 (m, 2H), 1.89 – 1.79 (m, 2H), 1.69 – 1.47 (m, 5H), 1.43 – 1.27 (m, 2H), 1.12 – 1.04 (m, 1H), 1.01 (s, 3H), 0.87 (s, 3H). **<sup>13</sup>C NMR (DMSO-*d*<sub>6</sub>, 101 MHz):** δ 165.6, 154.4, 146.9, 142.6, 139.5, 122.0, 77.0, 55.9, 54.3, 49.7, 45.0, 37.5, 36.2, 34.2, 31.3, 30.8, 30.6, 29.7, 27.2, 20.1, 18.8, 15.6. **HRMS (ESI):** Calcd for C<sub>22</sub>H<sub>30</sub>O<sub>5</sub> [M-H]<sup>-</sup> 373.2020, found 373.2023.

## 7. Procedure for 5 mmol Aryl Chloride Carboxylation

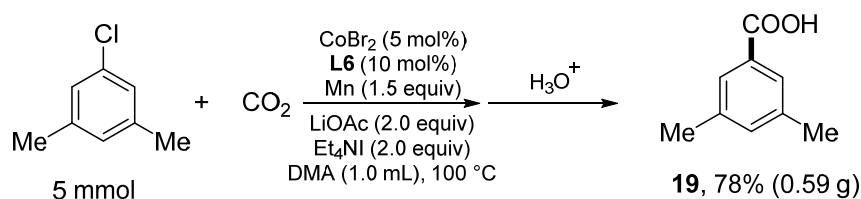

An oven-dried 500 mL Schlenk flask containing a stirring bar was charged with CoBr<sub>2</sub> (55 mg, 5.0 mol %), L6 (160 mg, 10.0 mol%), Mn powder (412 mg, 0.75 mmol, 1.5 equiv), Et<sub>4</sub>NI (2.57 g, 2.0 equiv) and LiOAc (660 mg, 2.0 equiv). The Schlenk flask was evacuated and back-filled under CO<sub>2</sub> flow (this procedure was repeated three times). Then, anhydrous DMA (20 mL) and aryl chlorides (5 mmol, 1.0 equiv) was added under CO<sub>2</sub> flow, and the resulting mixture was stirred at 100 °C for 24 h. The mixture was then allowed to cool to room temperature. Then HCl aq. (2 M) was added into the flask to quench this reaction and stirred for another 10 minutes at room temperature. The mixture was extracted with Et<sub>2</sub>O. The collected organic layer was combined and dried over anhydrous MgSO<sub>4</sub>. After removal of solvent, the crude products were purified by flash chromatography (acetic acid/EtOAc/petroleum ether = 0/1/20 to 0.001/1/4) affording 3,5-dimethylbenzoic acid (**19**) in 78% yield (0.59 g).

## 8. Control Experiment

**Procedure for the preparation of phenyl manganese chloride:**<sup>13</sup> A solution of MnCl<sub>4</sub>Li<sub>2</sub> was prepared by stirring anhydrous MnCl<sub>2</sub> (1.98g, 15.75 mmol) and anhydrous LiCl (1.33g, 31.5 mmol) in 25 ml of THF at room temperature until all MnCl<sub>2</sub> and LiCl dissolved. Then, PhMgCl (15 mmol, 1 M solution in THF) was added at -10°C. The solution was stirred at -10 °C to 0 °C for 15 minutes, then for 1 h at 0 °C. The concentration of phenyl manganese chloride solution was determined by titration with I<sub>2</sub>/LiCl,<sup>14</sup> which was used immediately for next step.

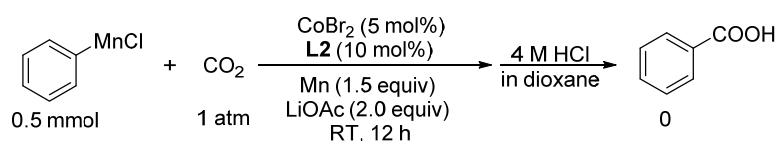

An oven-dried 50 mL Schlenk tube containing a stirring bar was charged with CoBr<sub>2</sub> (5.5 mg, 5.0 mol %), L2 (10.4 mg, 10.0 mol%), Mn powder (41.2 mg, 1.5 equiv) and LiOAc (66

mg, 2.0 equiv). The Schlenk tube was evacuated and back-filled under CO<sub>2</sub> flow (this procedure was repeated three times). Then, anhydrous DMA (1.0 mL) and PhMnCl (0.5 mmol, 1.0 equiv, 0.32 M in THF) was added under CO<sub>2</sub> flow, and the resulting mixture was stirred at room temperature for 12 h. Then, the mixture was carefully quenched with 4 M HCl (in 1,4-dioxane) and stirred for 10 minutes. No desired product was detected. This result indicated ArMnCl may not serve as an intermediate in the catalytic cycle.

## 9. Copies of $^1\text{H}$ , $^{13}\text{C}$ and $^{19}\text{F}$ NMR Spectra for Compounds

### $^1\text{H}$ NMR spectrum of **2h**

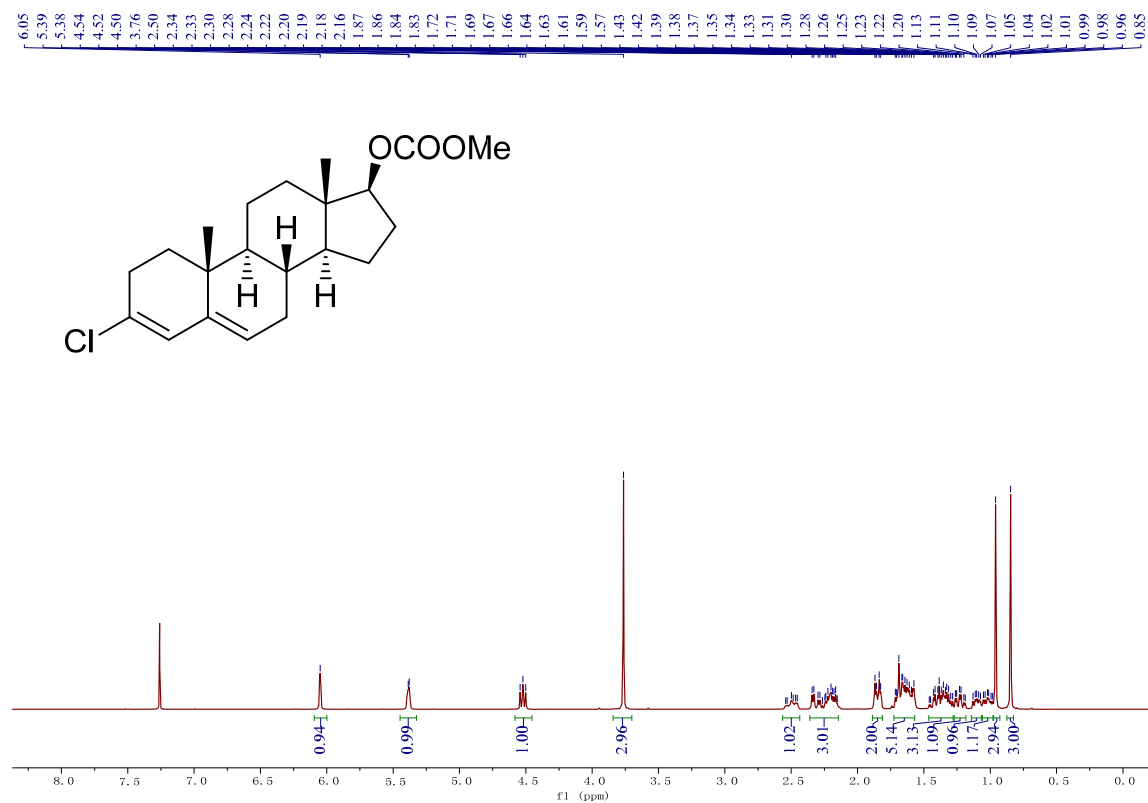

### $^{13}\text{C}$ NMR spectrum of **2h**

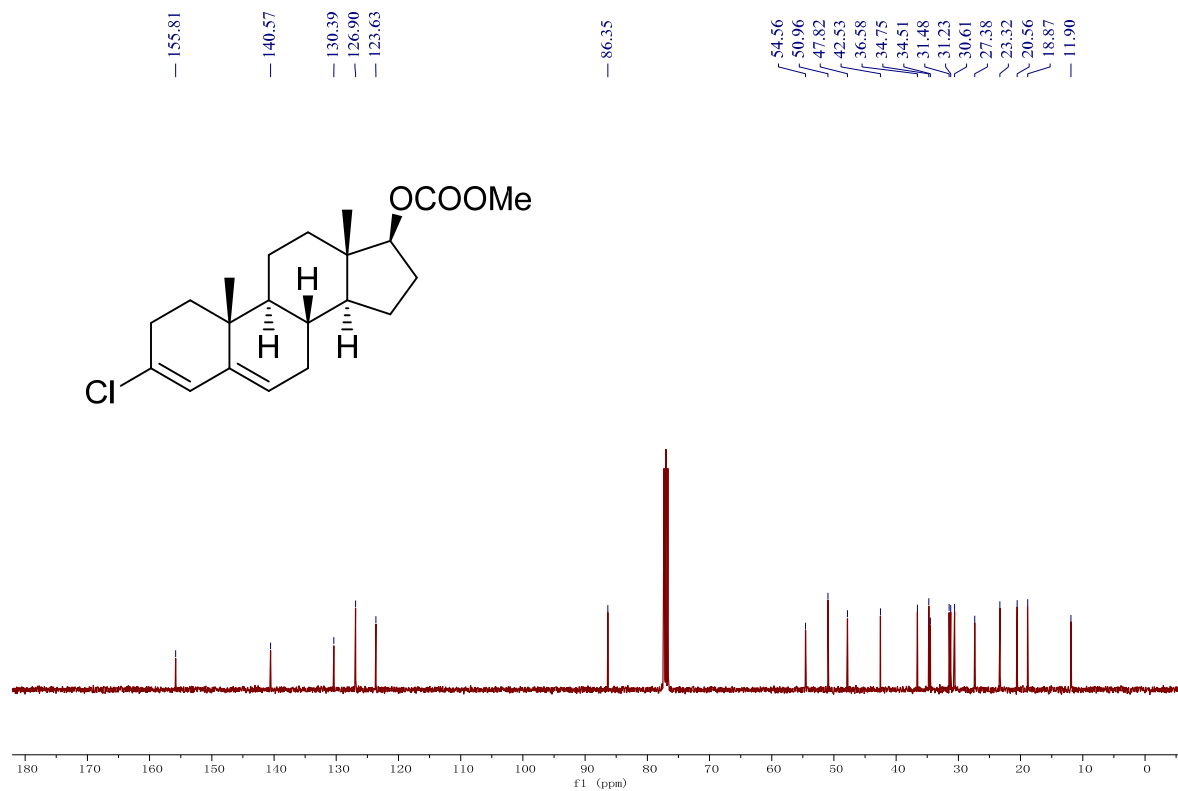

<sup>1</sup>H NMR spectrum of **2i**

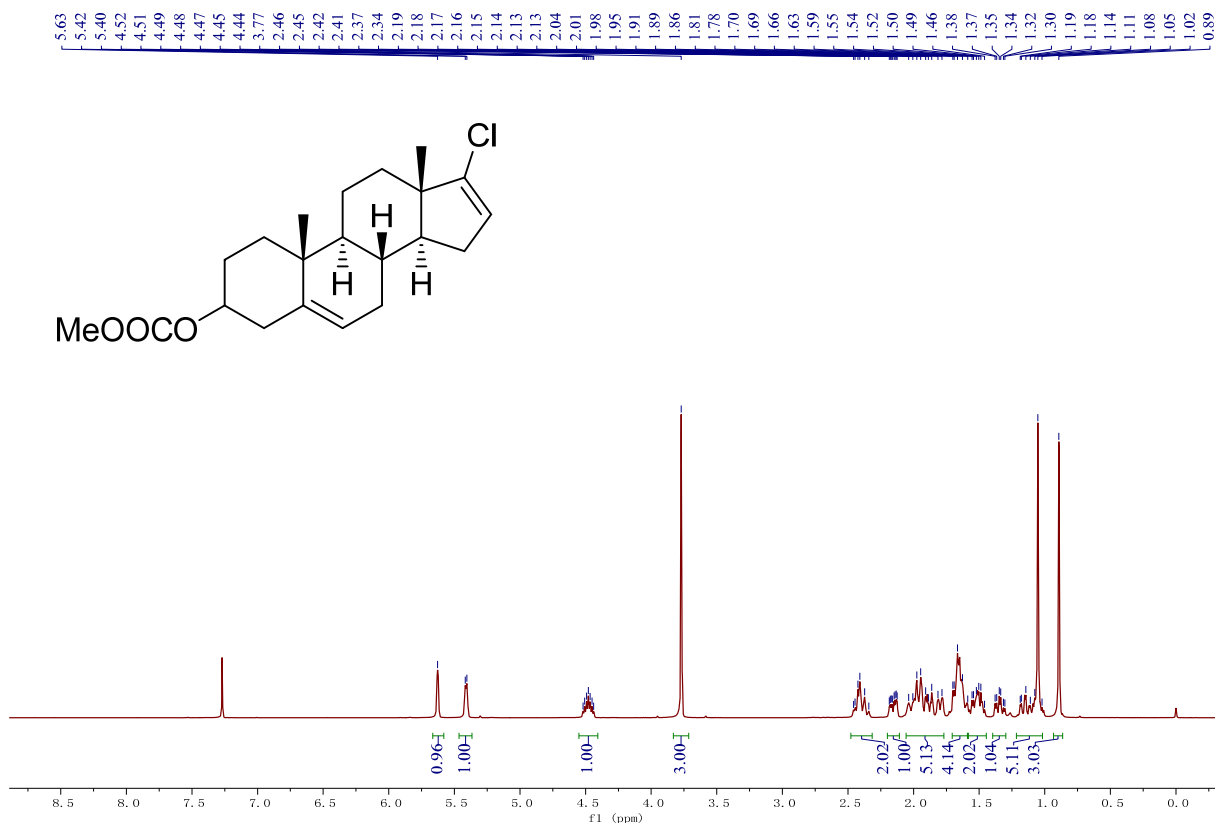

<sup>13</sup>C NMR spectrum of **2i**

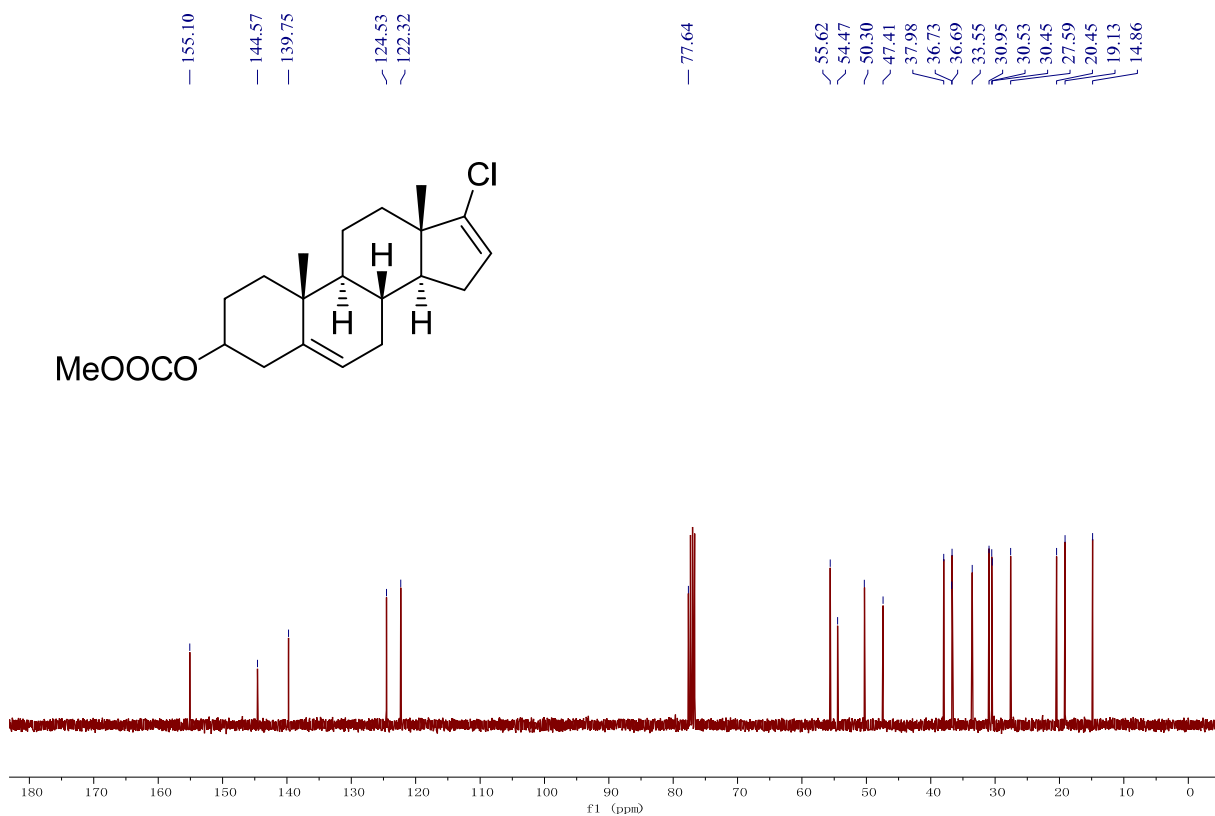

<sup>1</sup>H NMR spectrum of **1**

12.64  
7.90  
7.88  
7.02  
7.00  
3.82

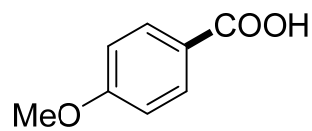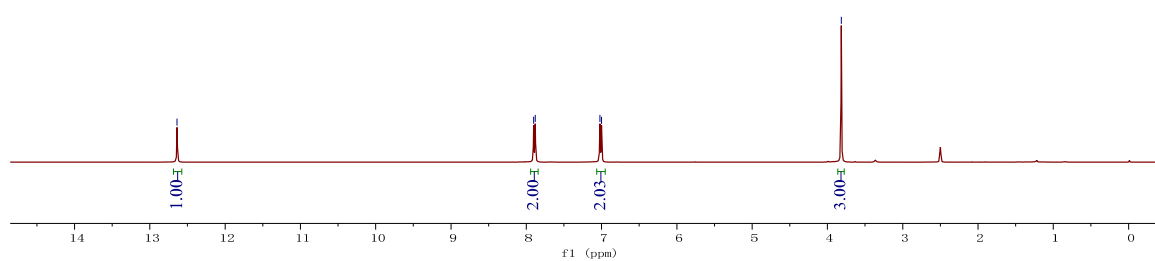

<sup>13</sup>C NMR spectrum of

166.97  
162.78  
131.30  
122.89  
113.75  
55.38

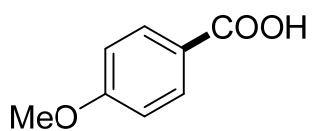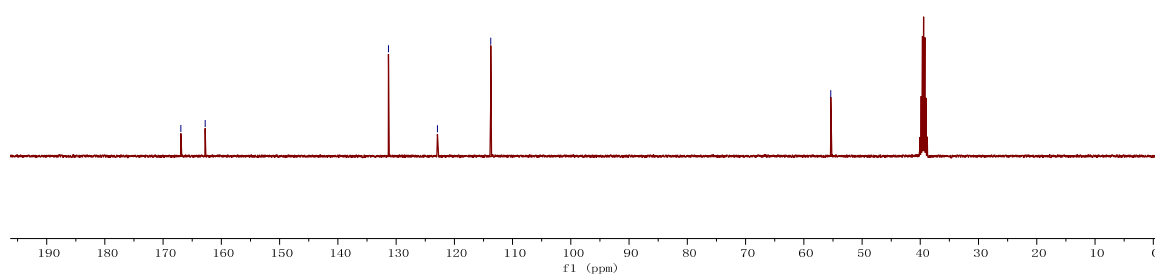



### <sup>1</sup>H NMR spectrum of **2**

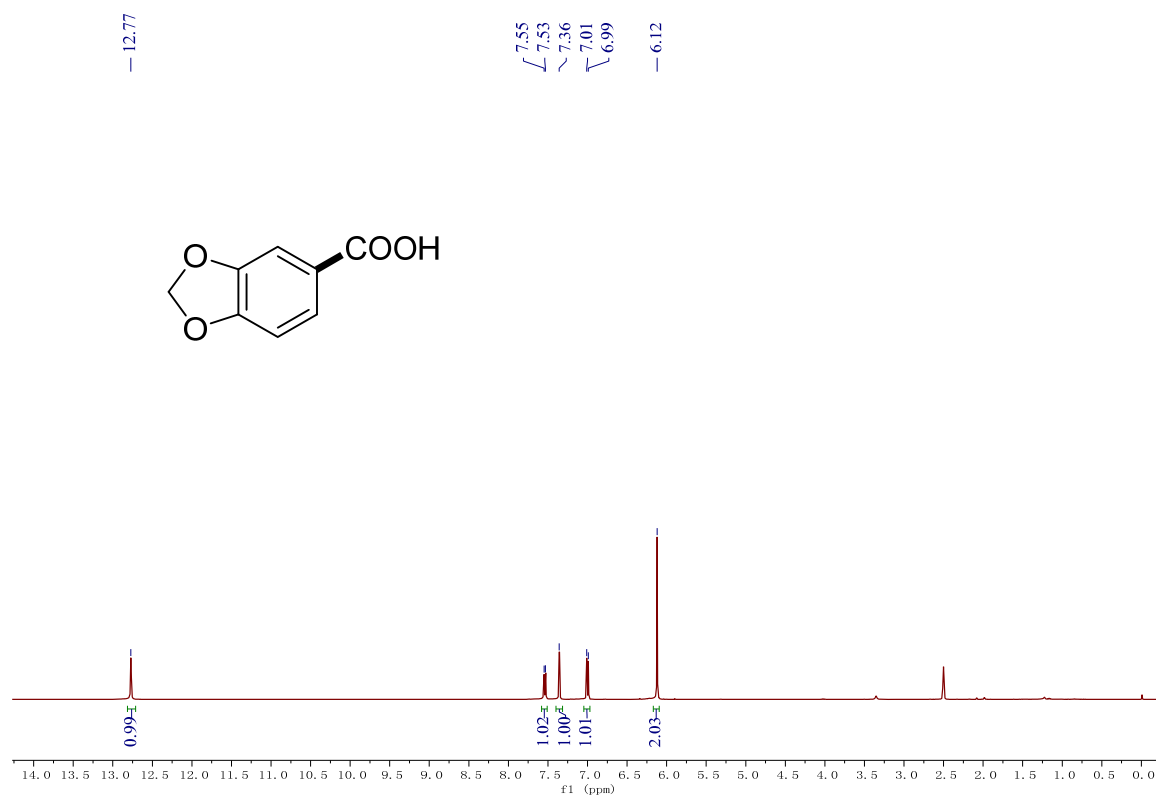

### <sup>13</sup>C NMR spectrum of **2**

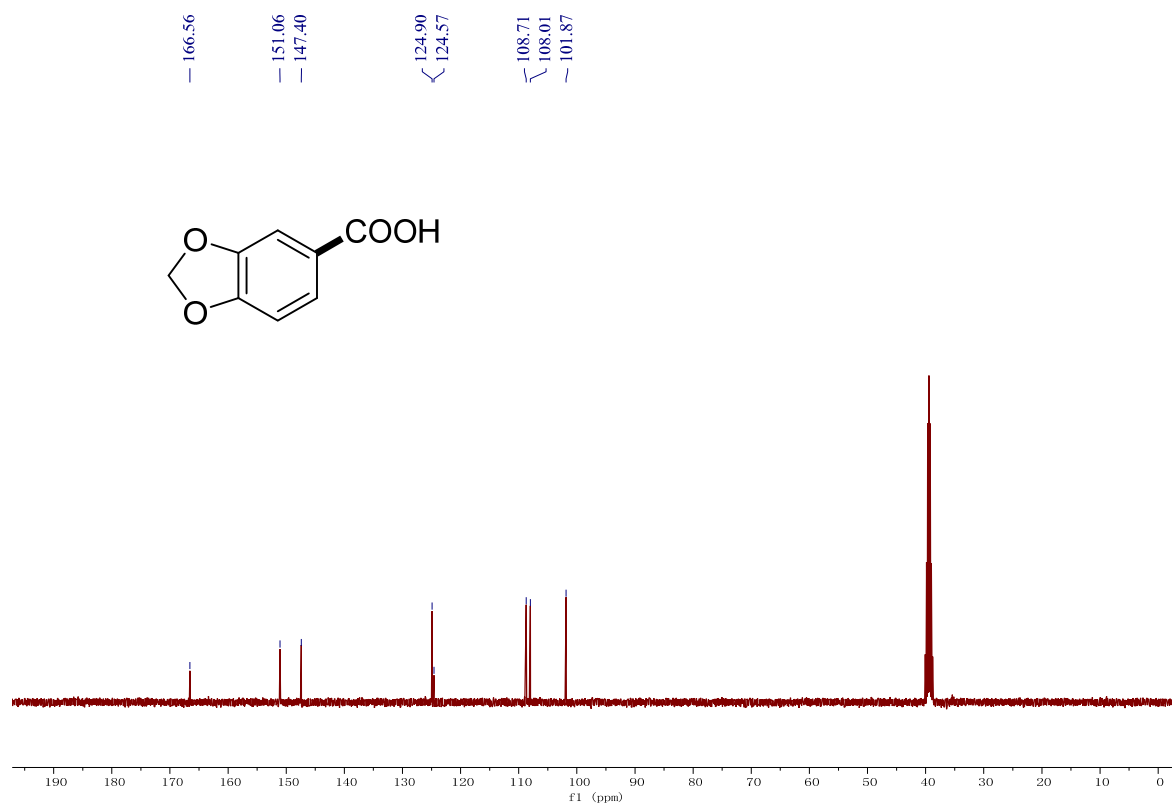

### $^1\text{H}$ NMR spectrum of **3**

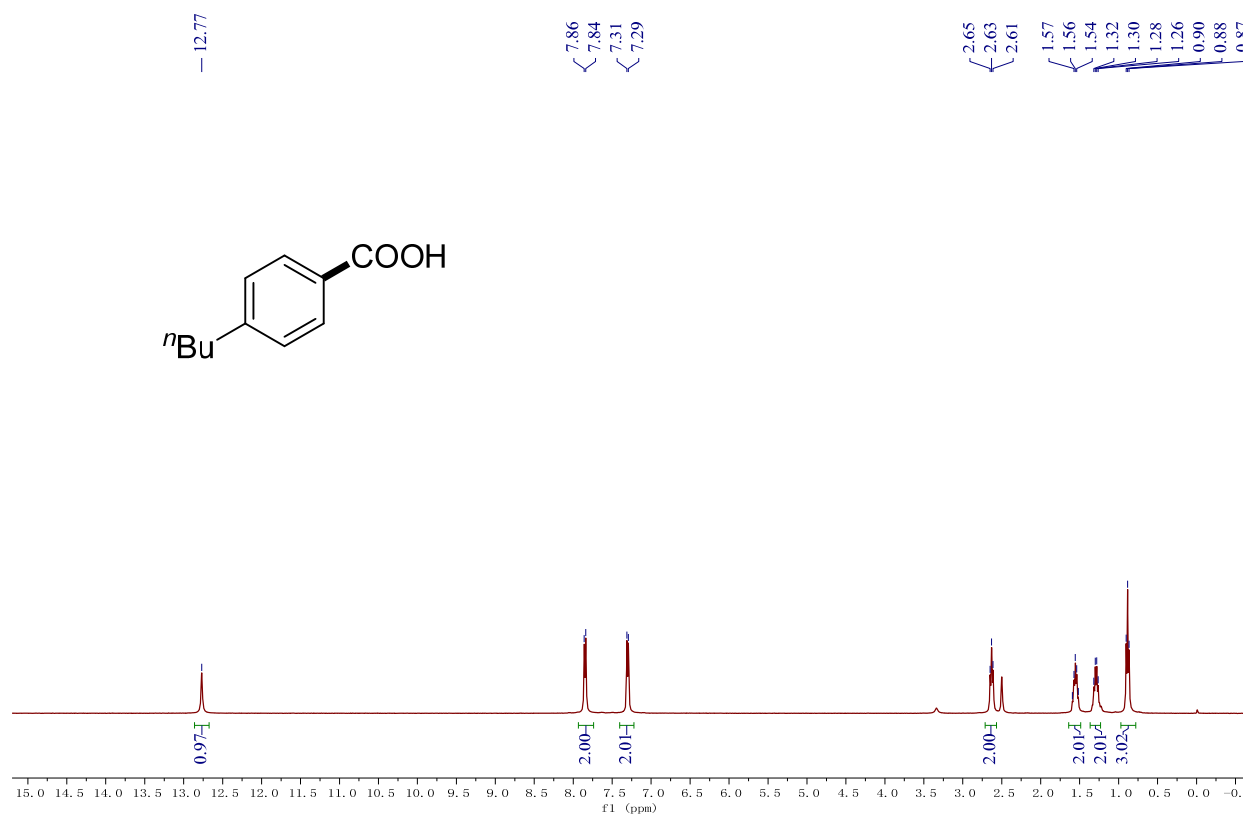

### $^{13}\text{C}$ NMR spectrum of **3**

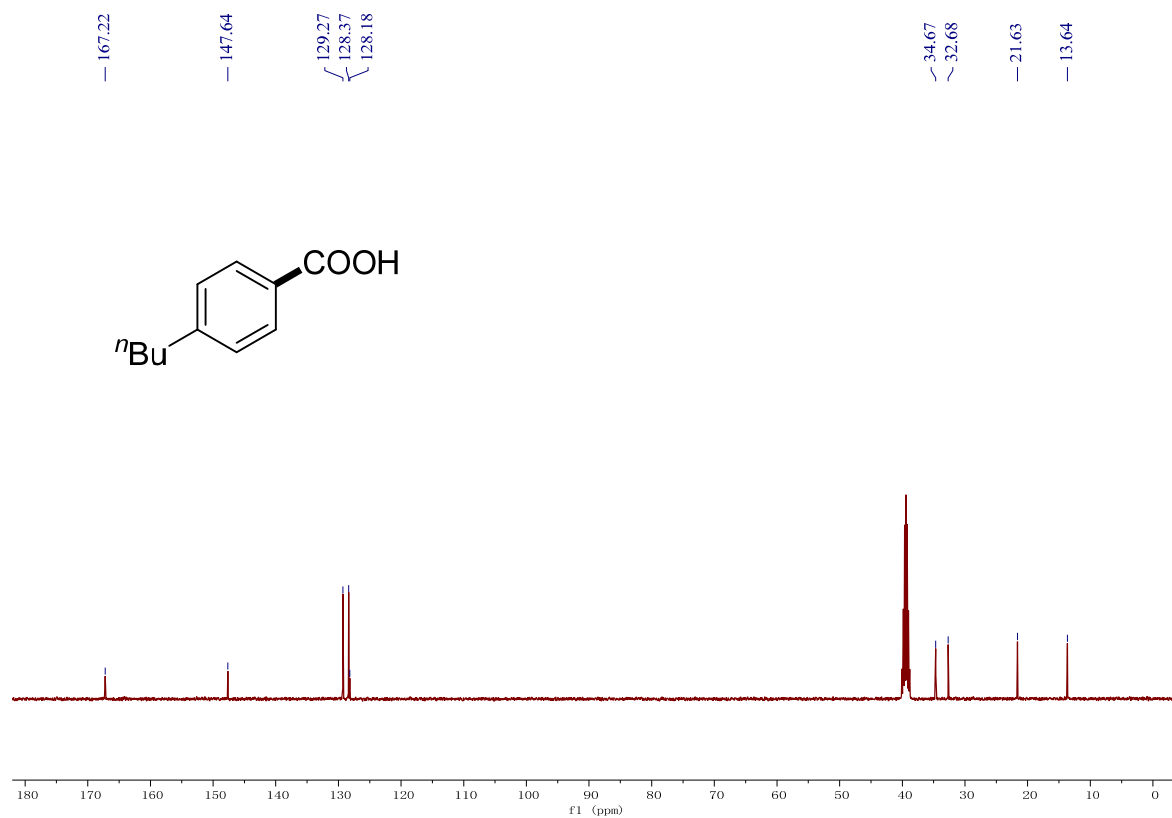

### <sup>1</sup>H NMR spectrum of 4

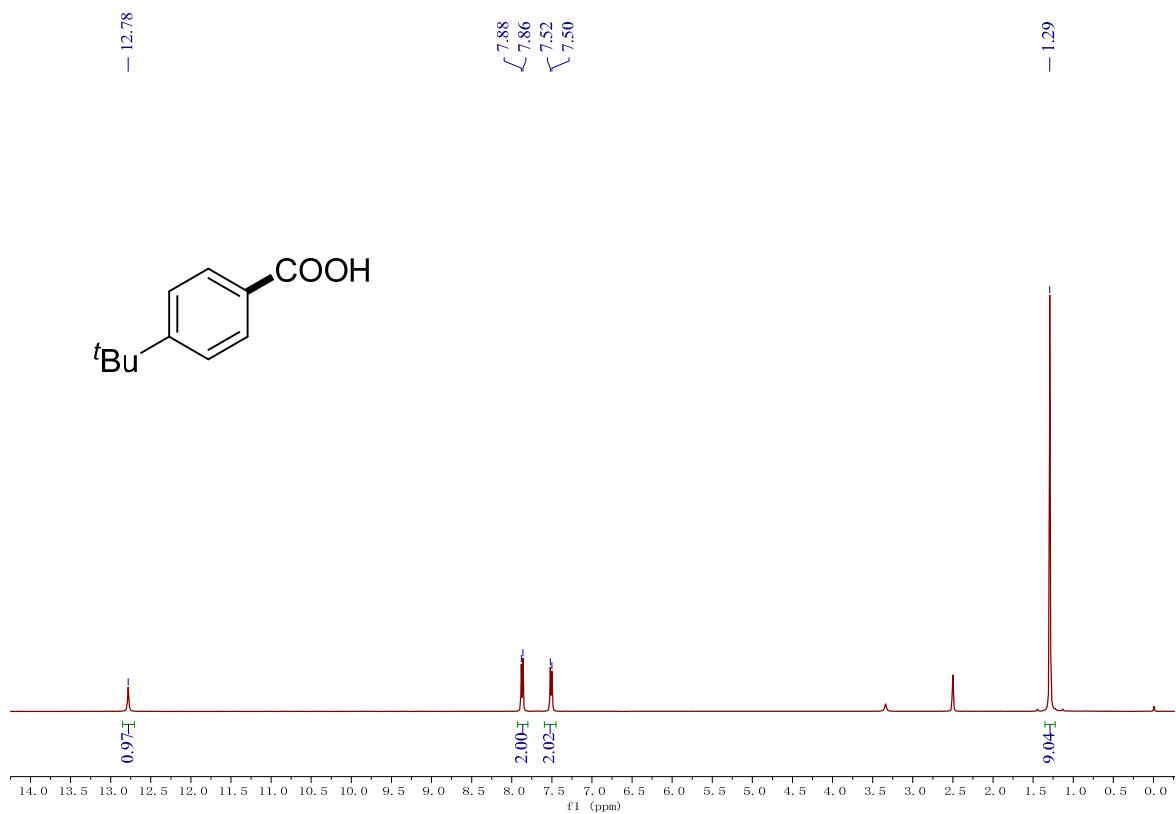

### <sup>13</sup>C NMR spectrum of 4

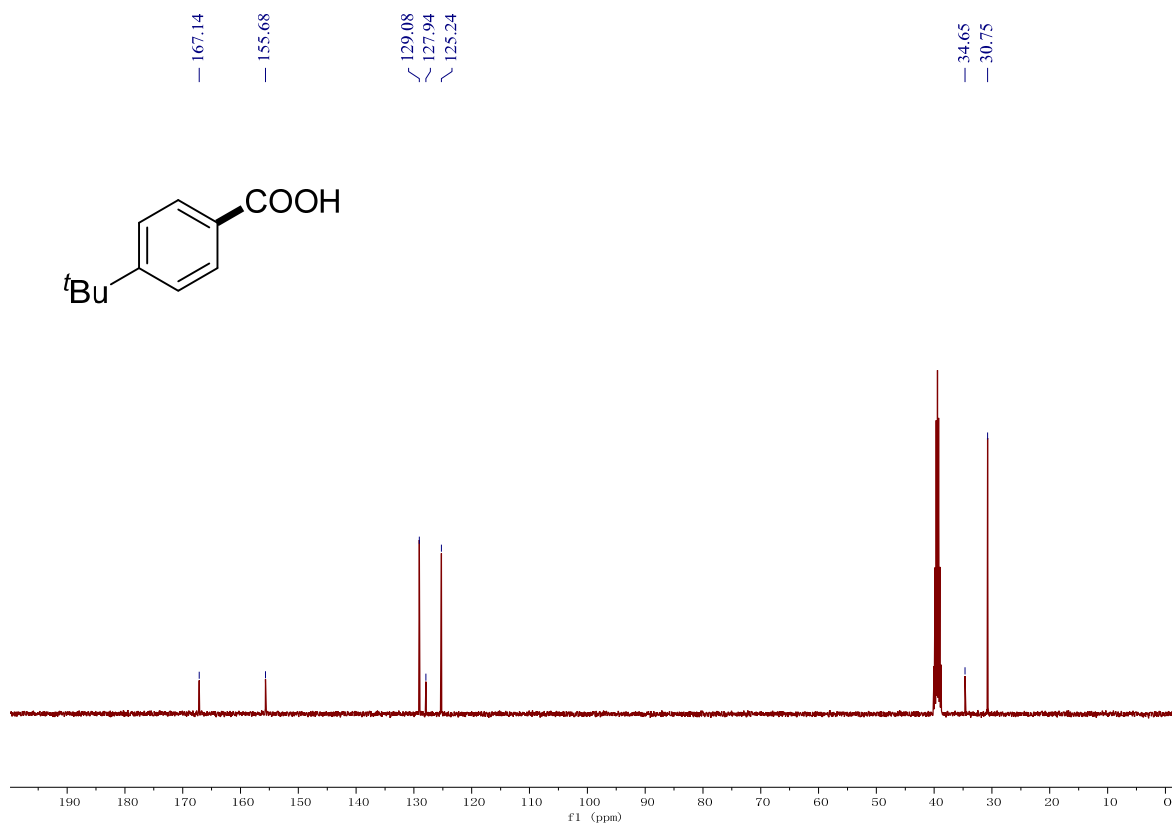

# <sup>1</sup>H NMR spectrum of **5**

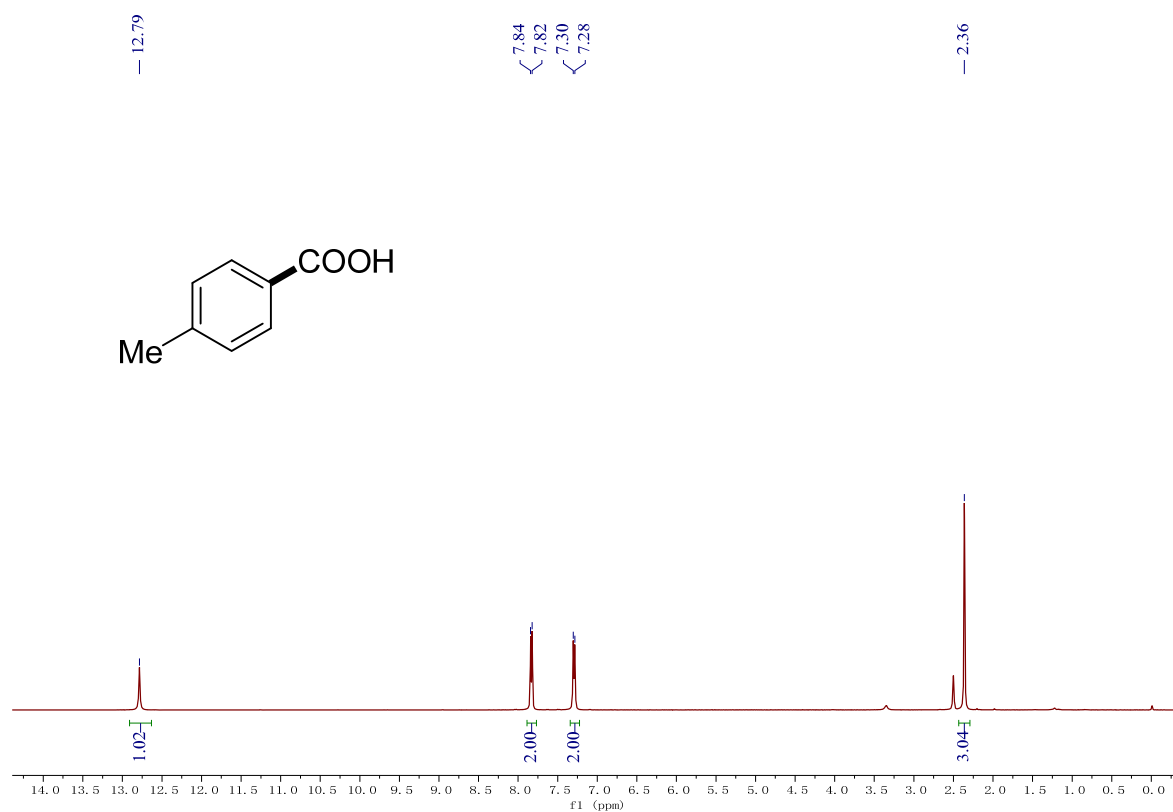

# <sup>13</sup>C NMR spectrum of **5**

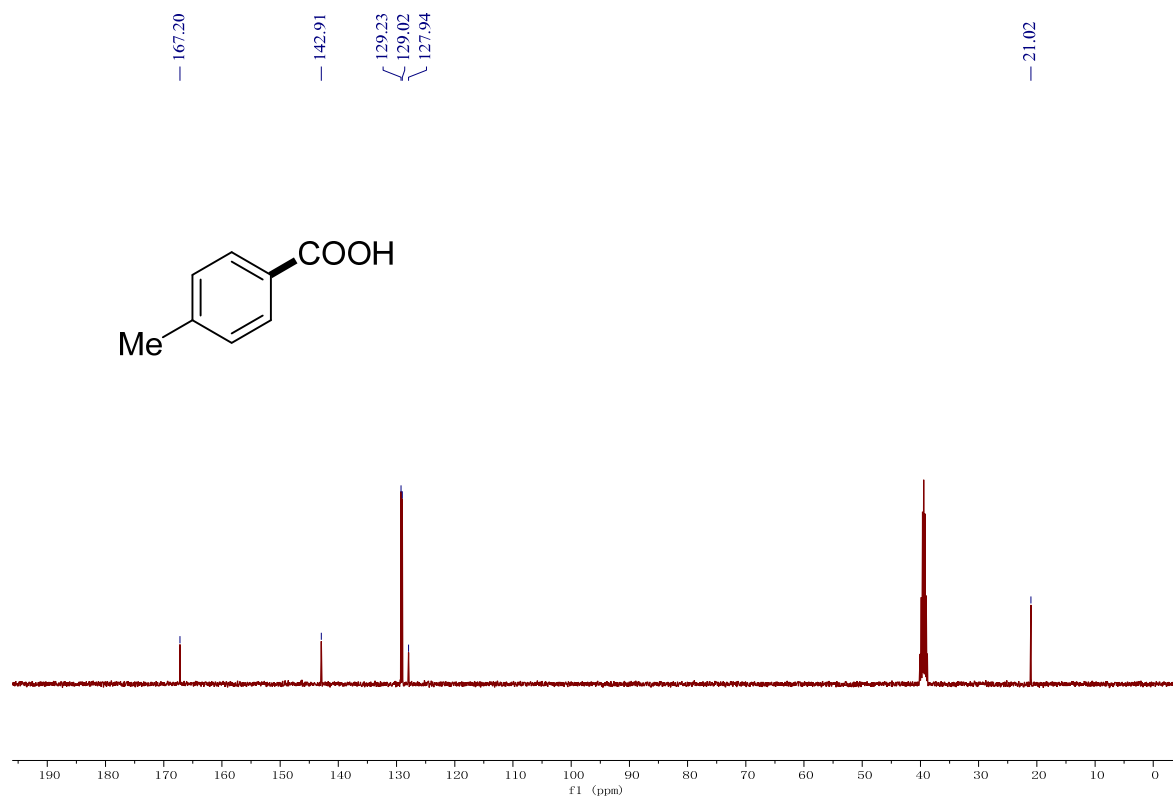

# <sup>1</sup>H NMR spectrum of 6

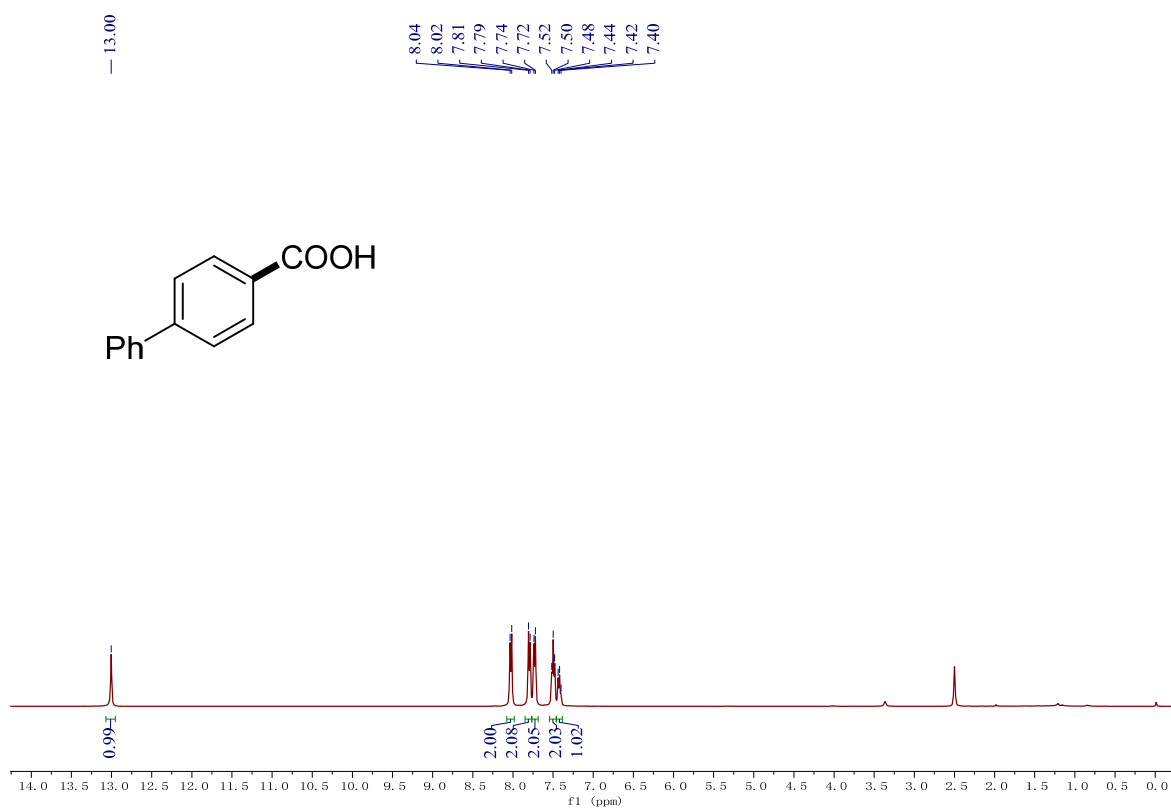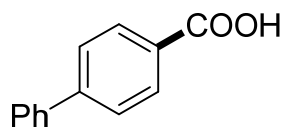

# <sup>13</sup>C NMR spectrum of 6

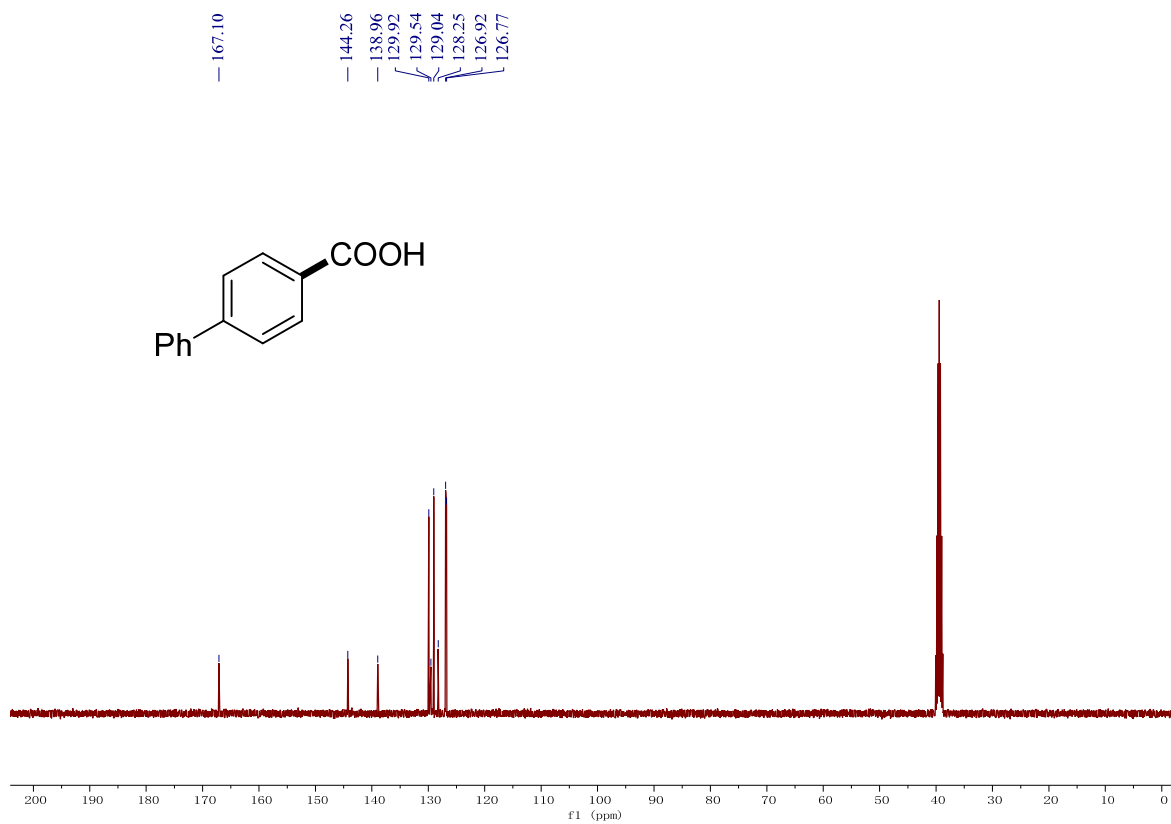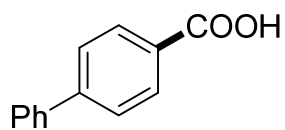

# <sup>1</sup>H NMR spectrum of 7

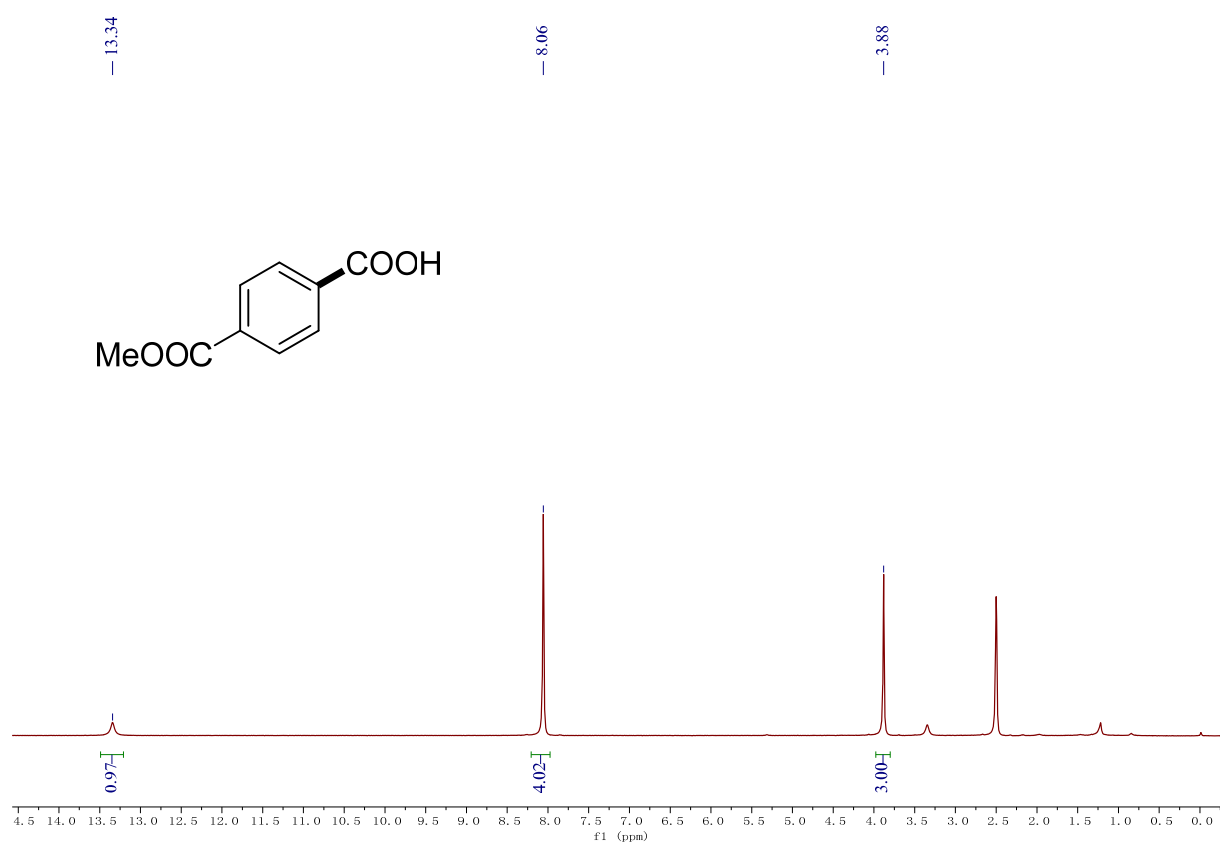

# <sup>13</sup>C NMR spectrum of 7

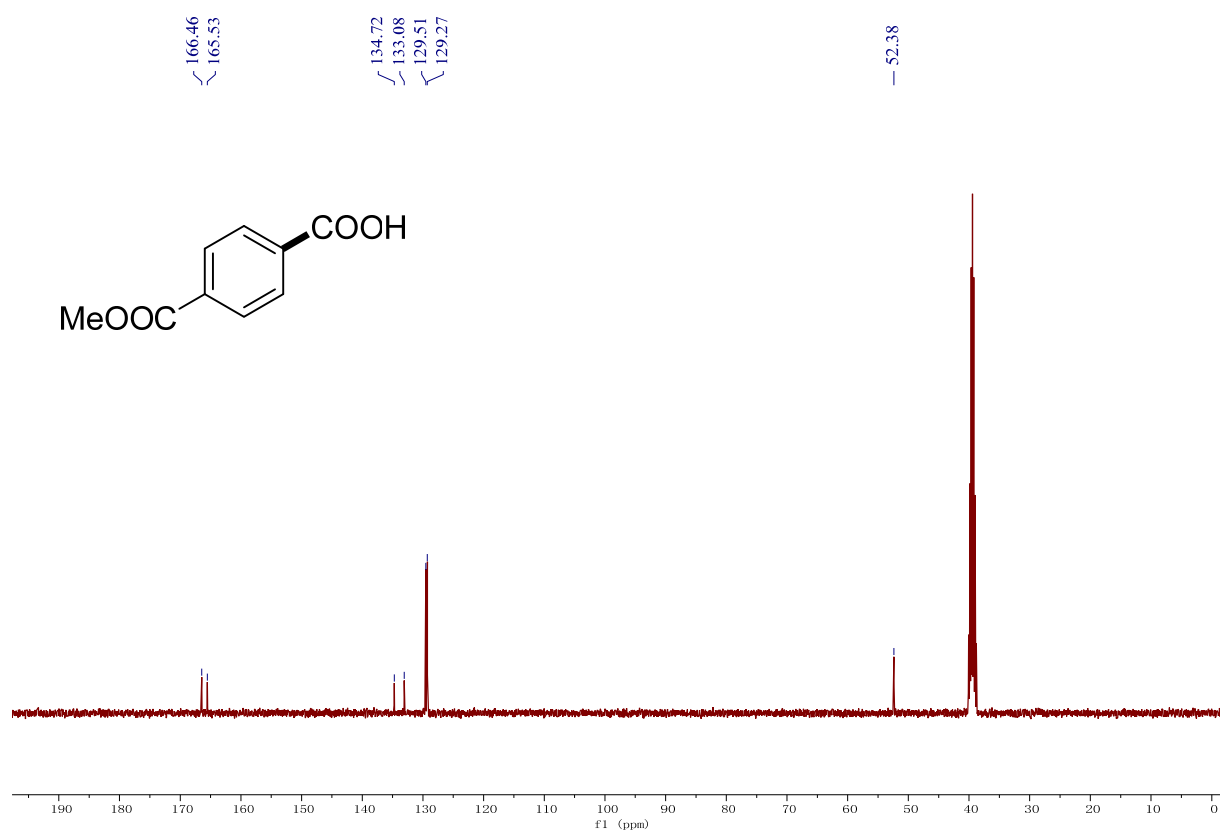

# <sup>1</sup>H NMR spectrum of **8**

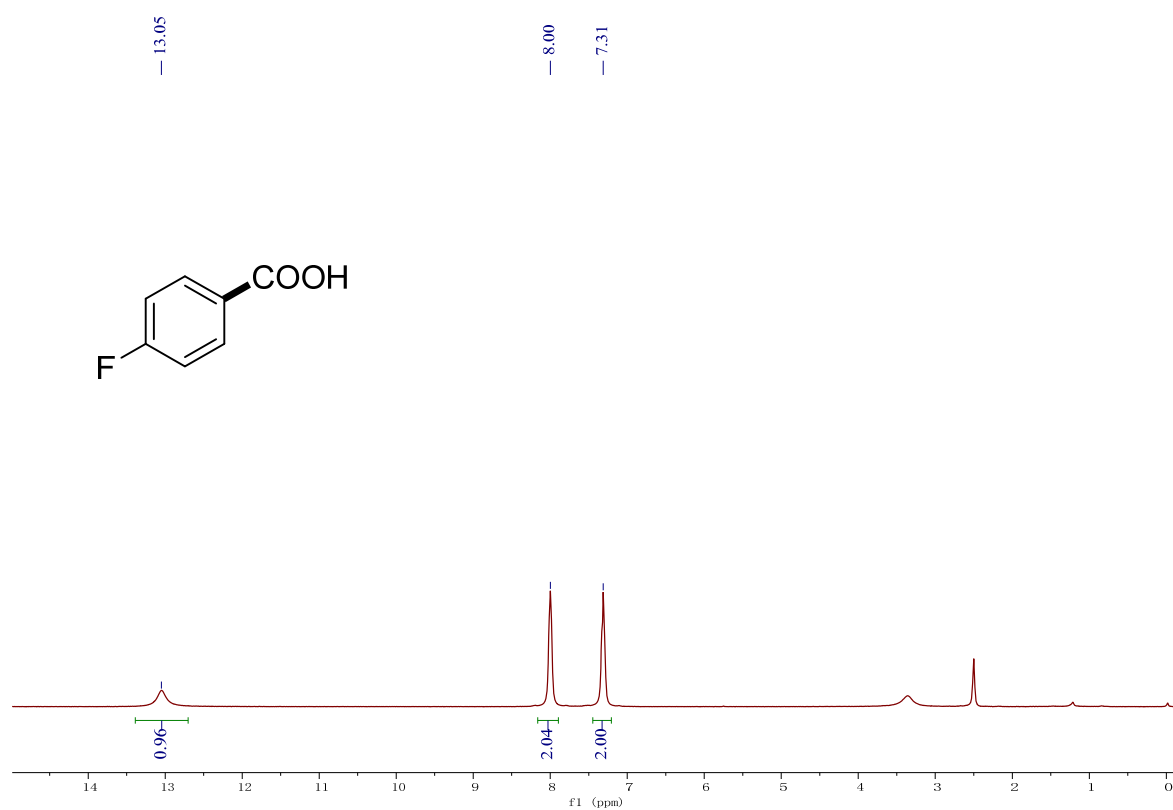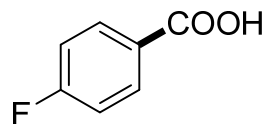

# <sup>13</sup>C NMR spectrum of **8**

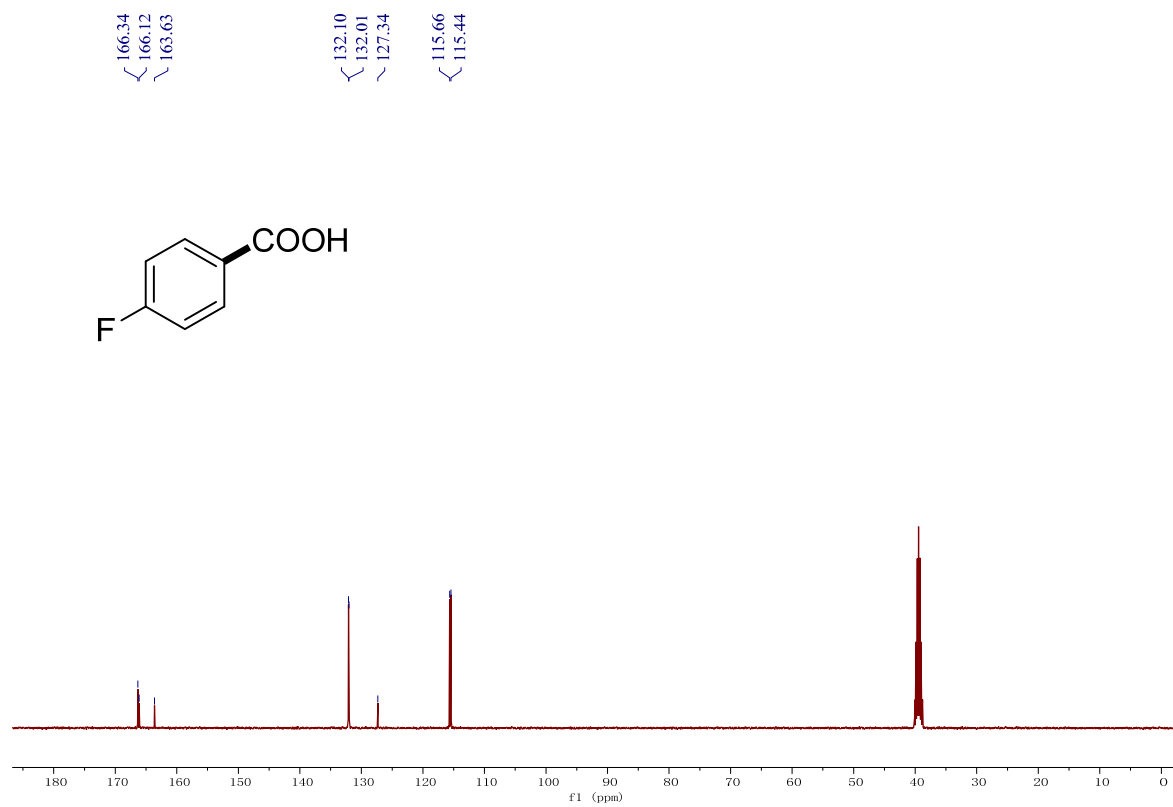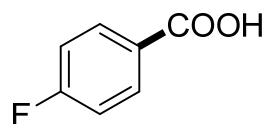

$^{19}\text{F}$  NMR spectrum of **8**

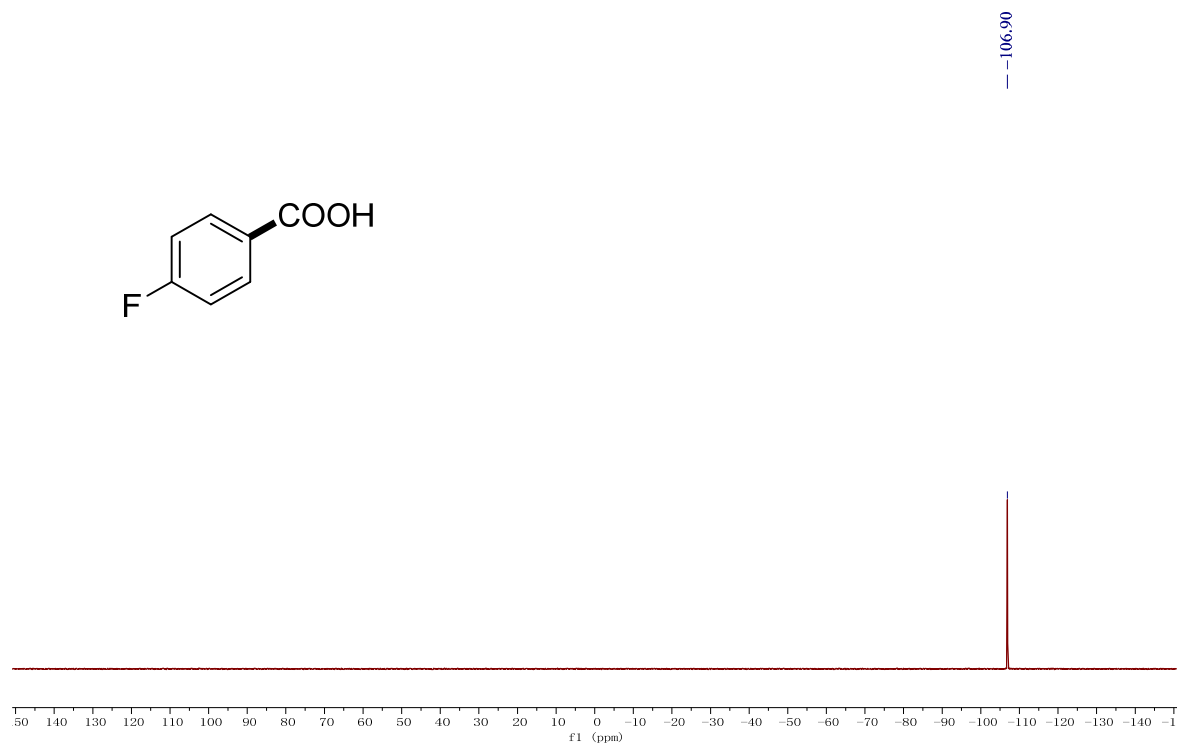

$^1\text{H}$  NMR spectrum of **9**

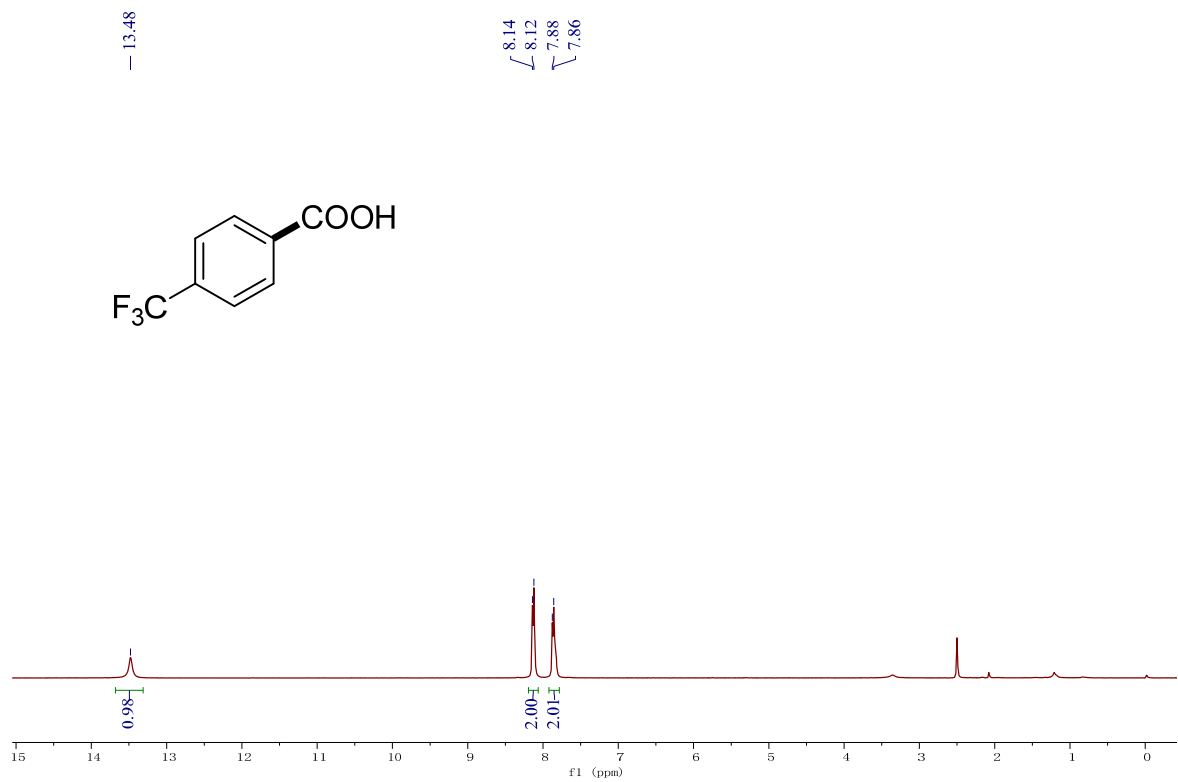



### $^{13}\text{C}$ NMR spectrum of **9**

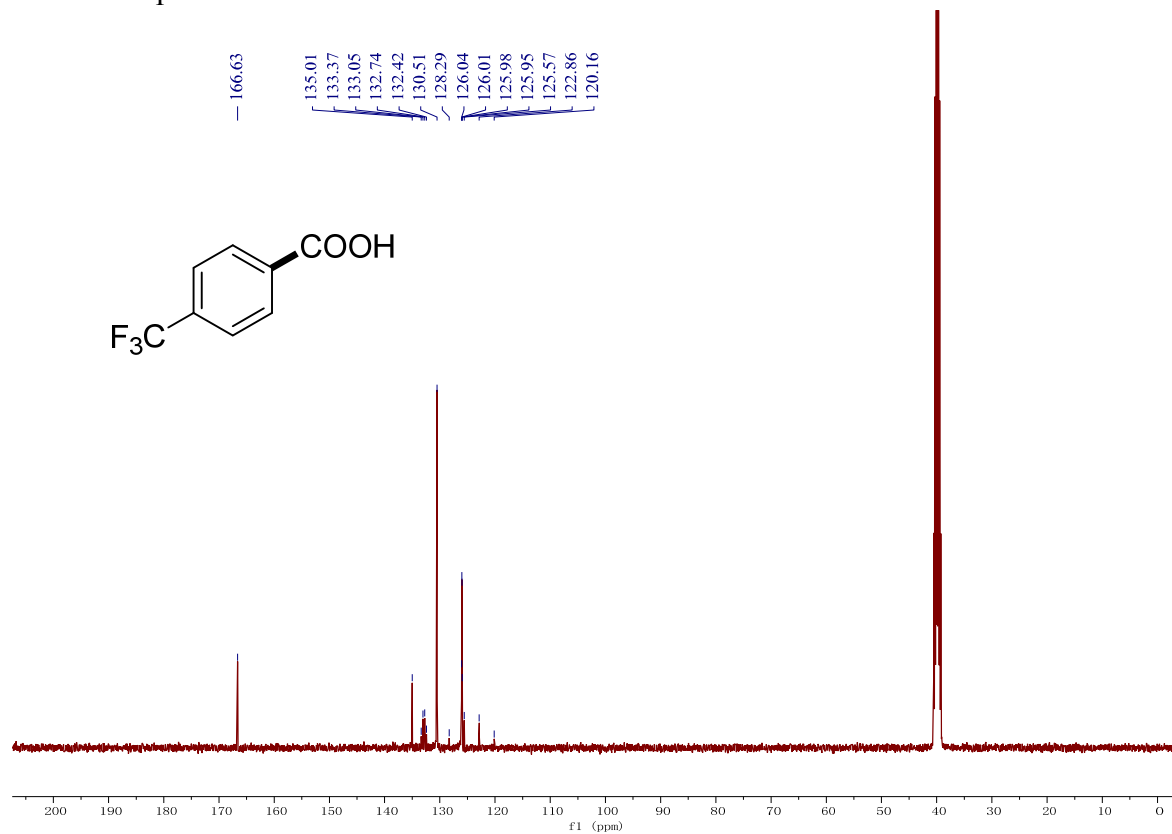

### $^{19}\text{F}$ NMR spectrum of **9**

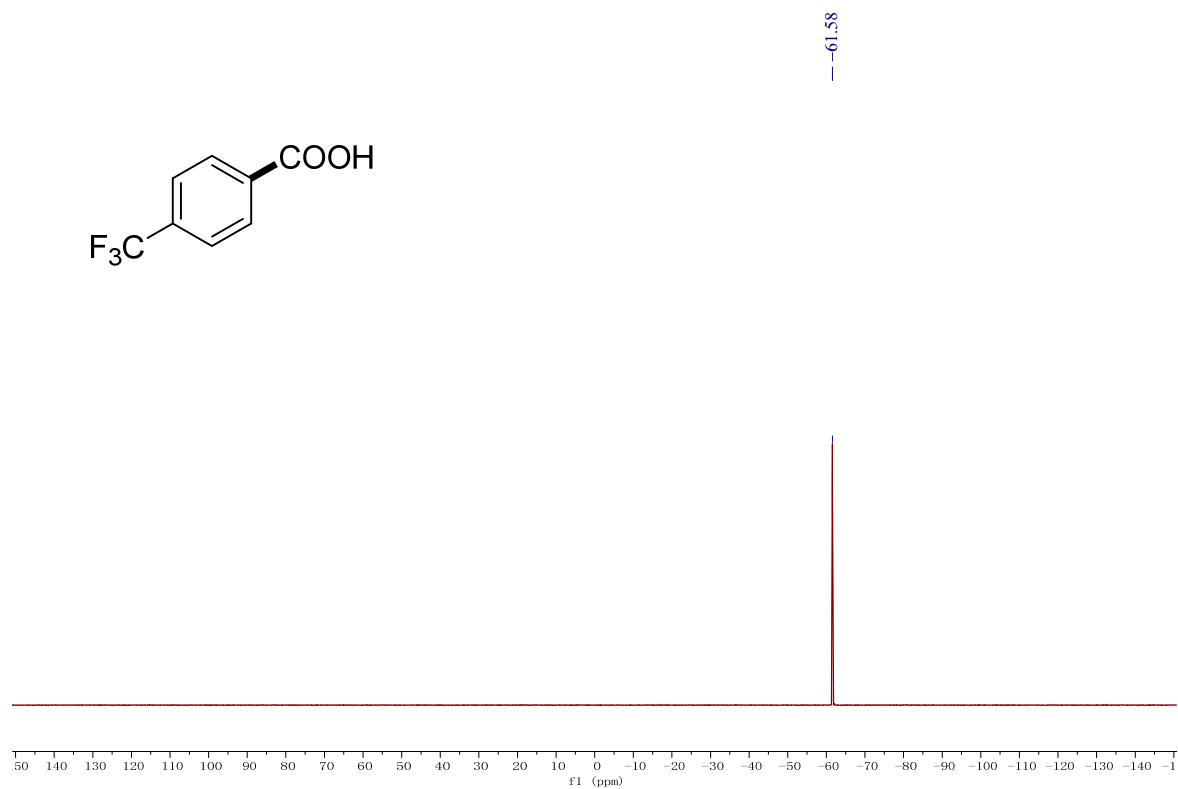

# <sup>1</sup>H NMR spectrum of **10**

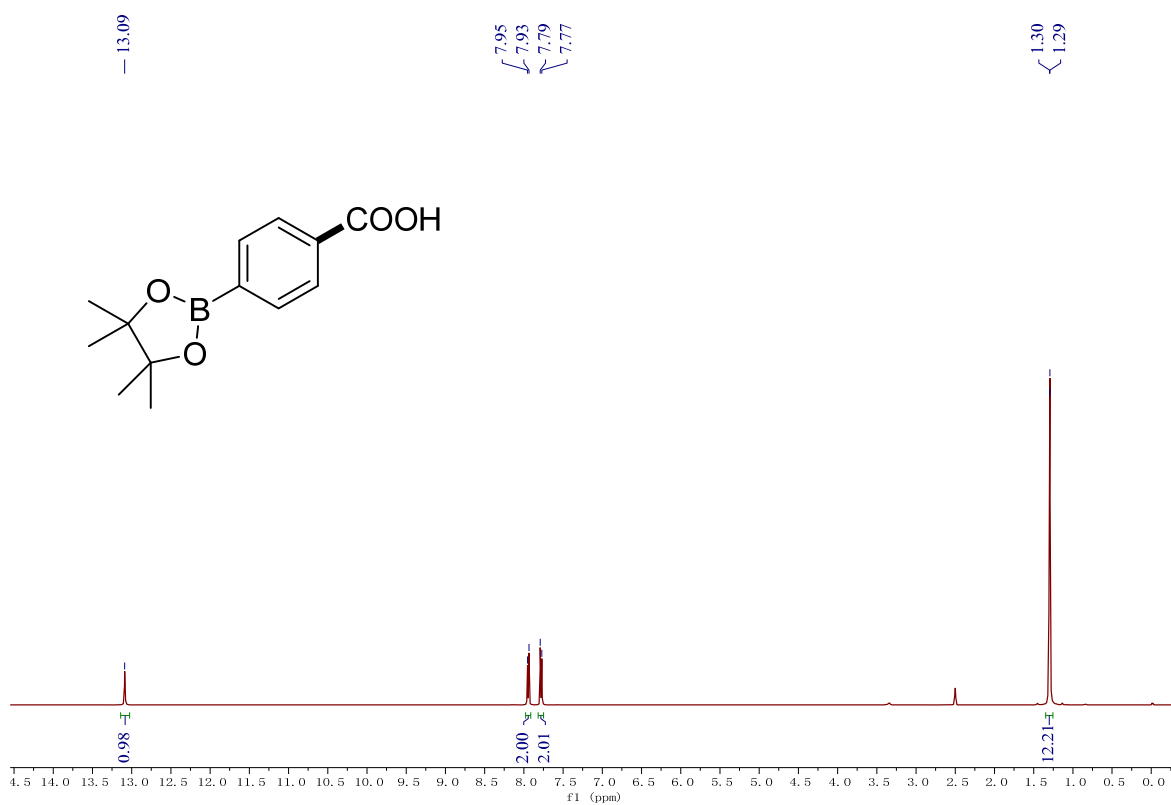

# <sup>13</sup>C NMR spectrum of **10**

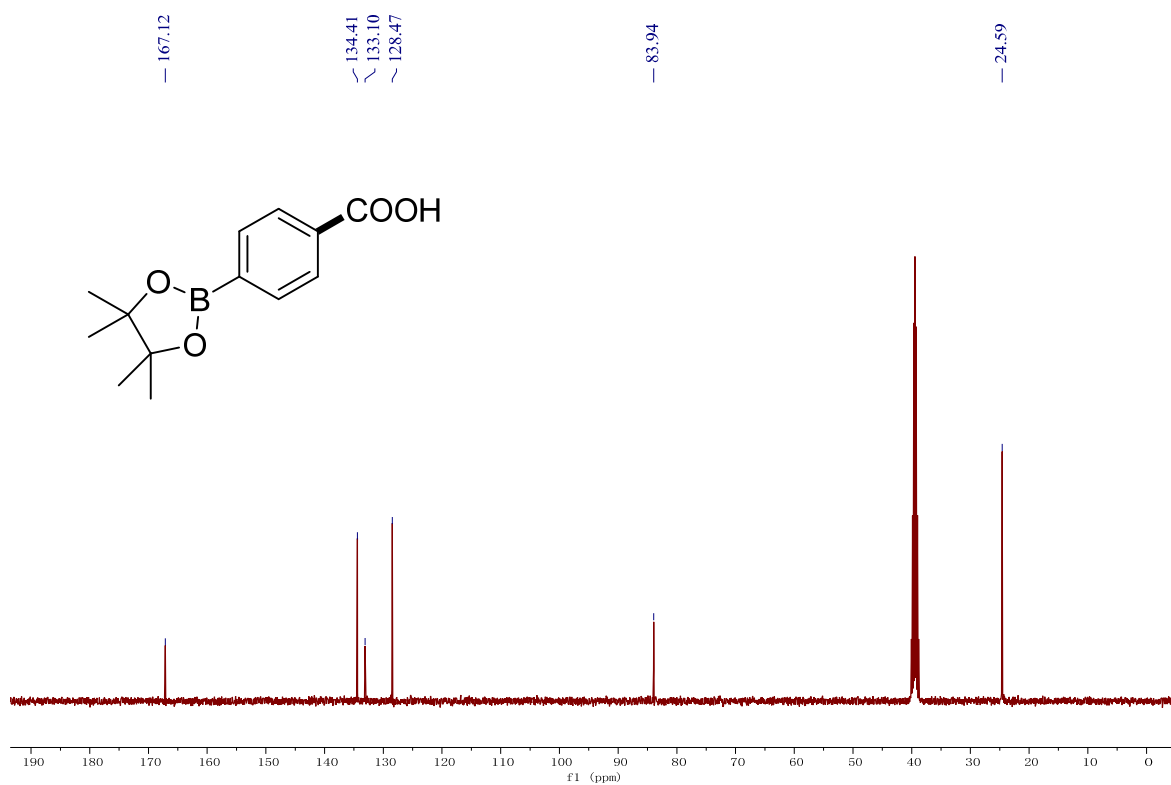

### $^1\text{H}$ NMR spectrum of **11**

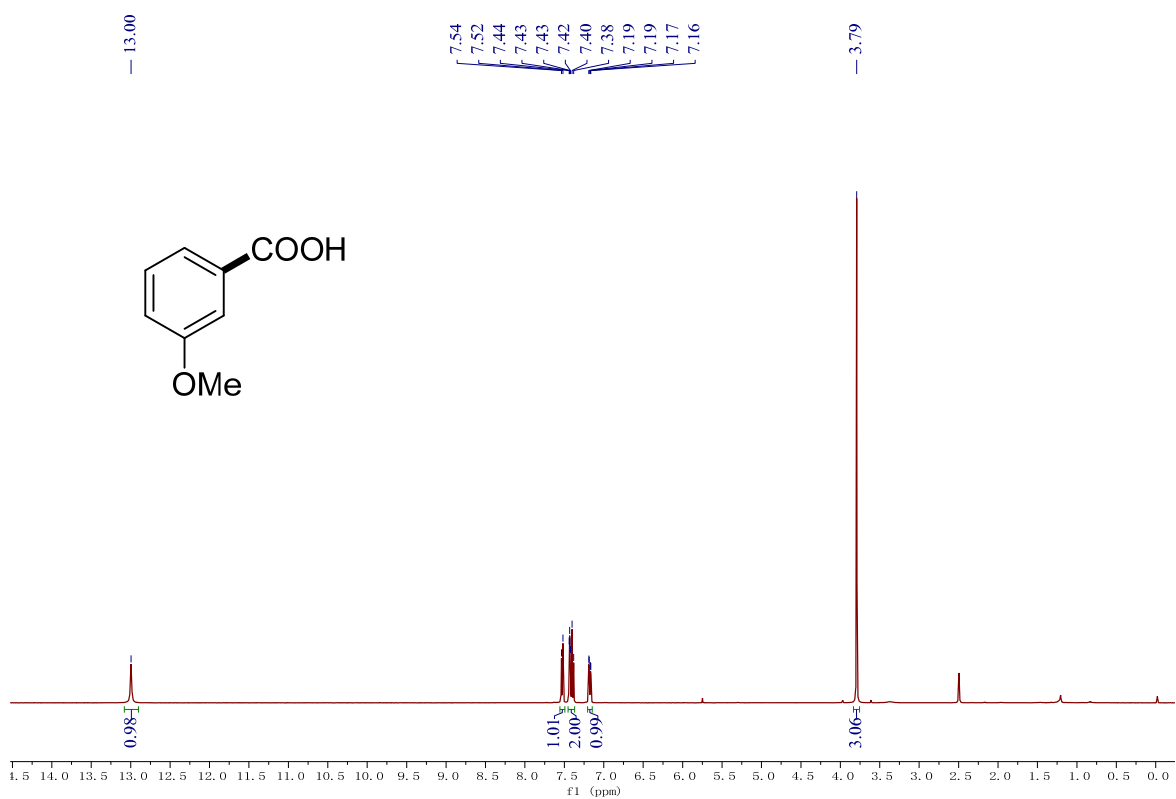

### $^{13}\text{C}$ NMR spectrum of **11**

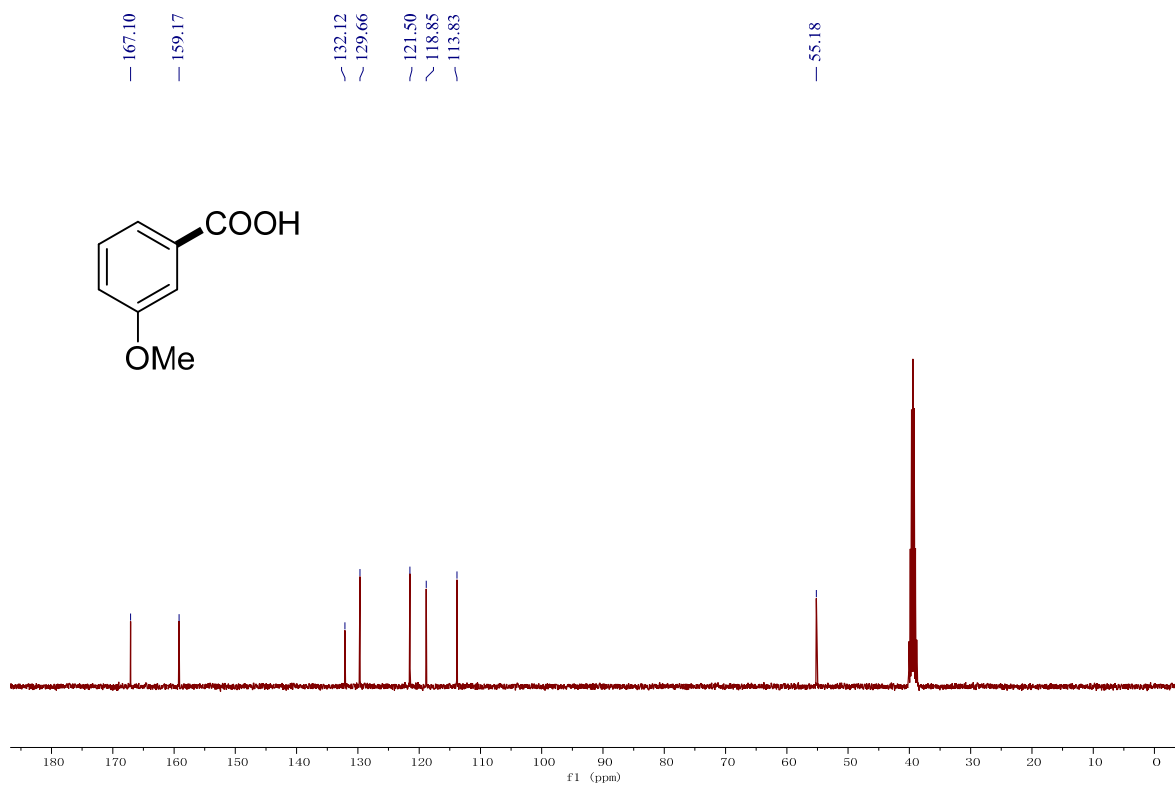

# <sup>1</sup>H NMR spectrum of 12

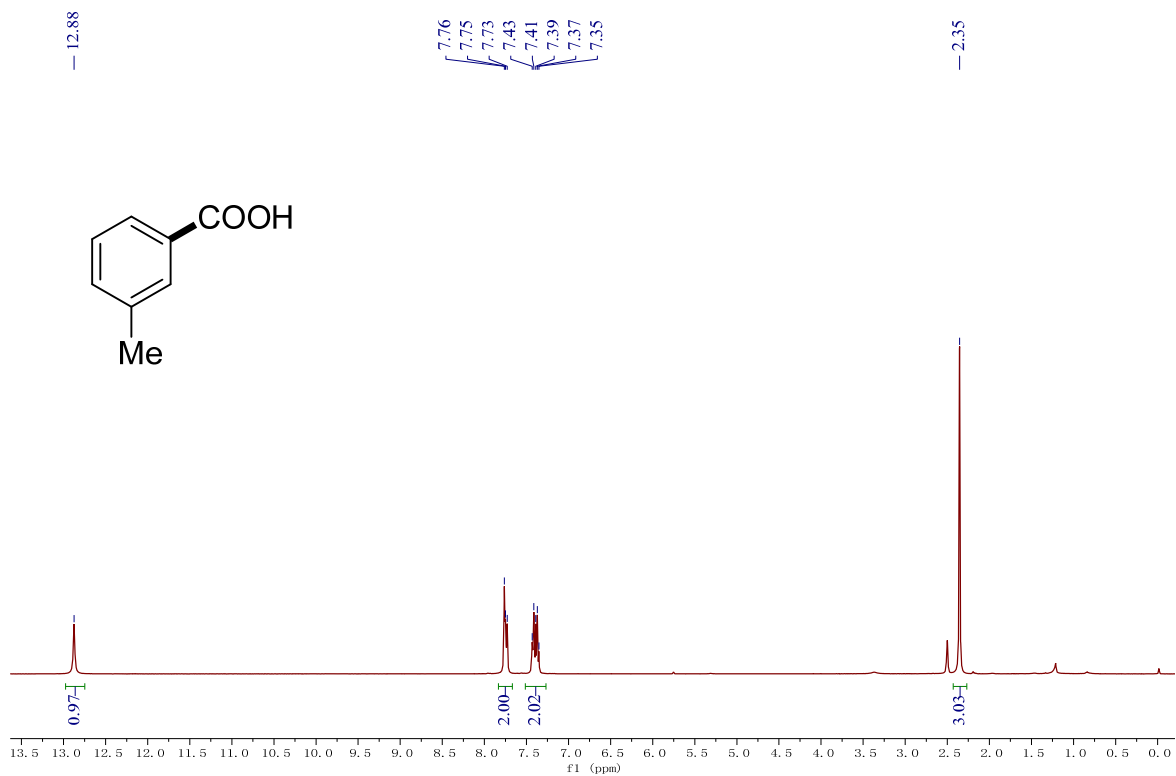

# <sup>13</sup>C NMR spectrum of 12

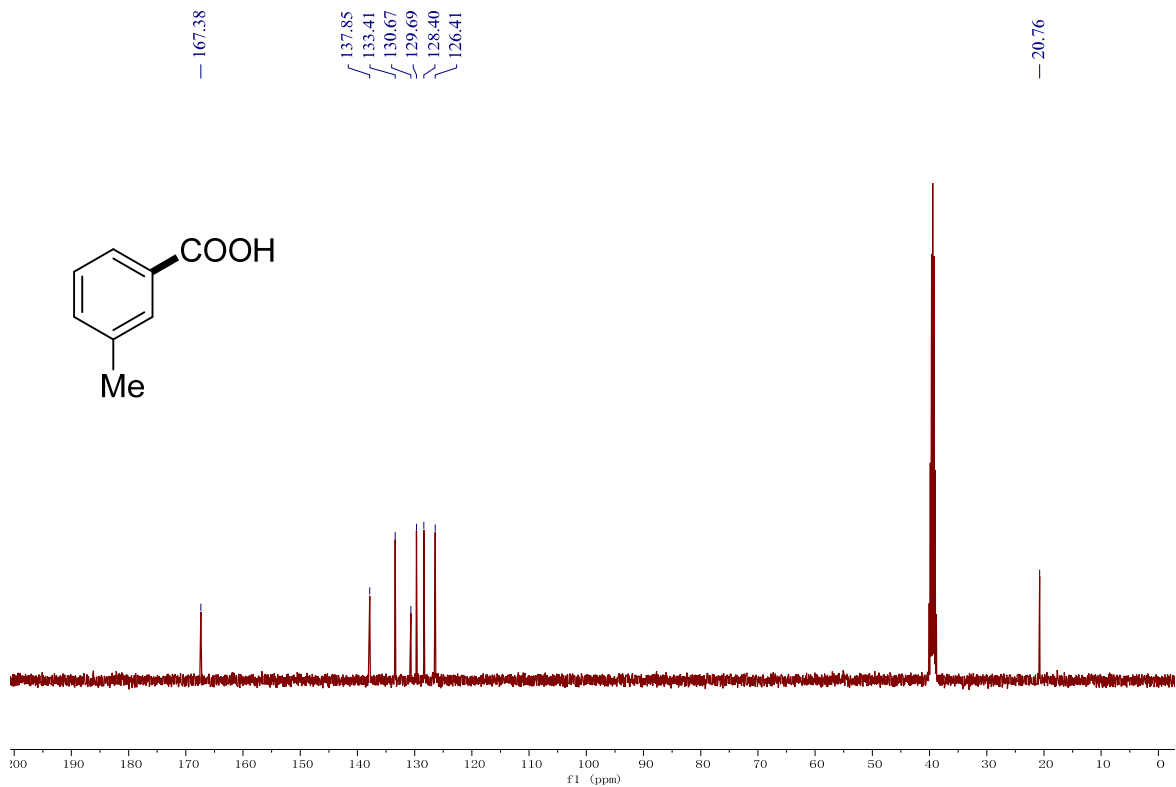

### $^1\text{H}$ NMR spectrum of **13**

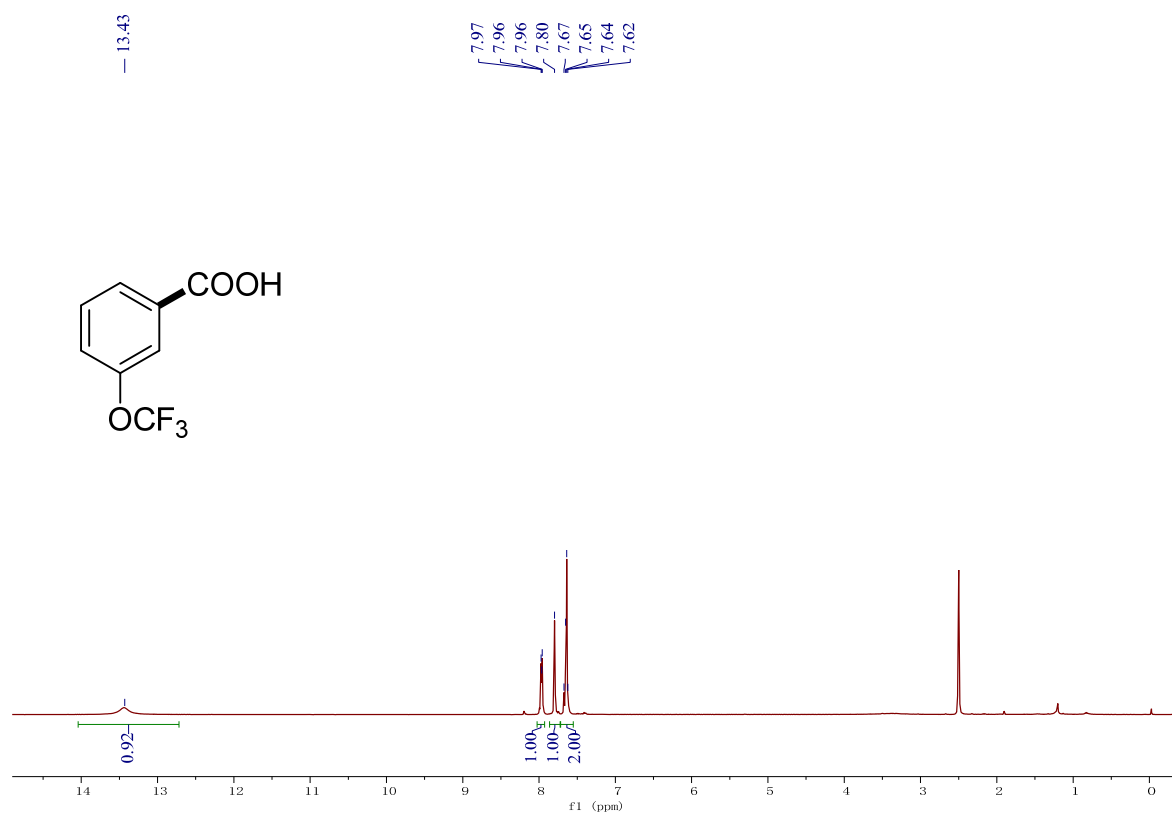

### $^{13}\text{C}$ NMR spectrum of **13**

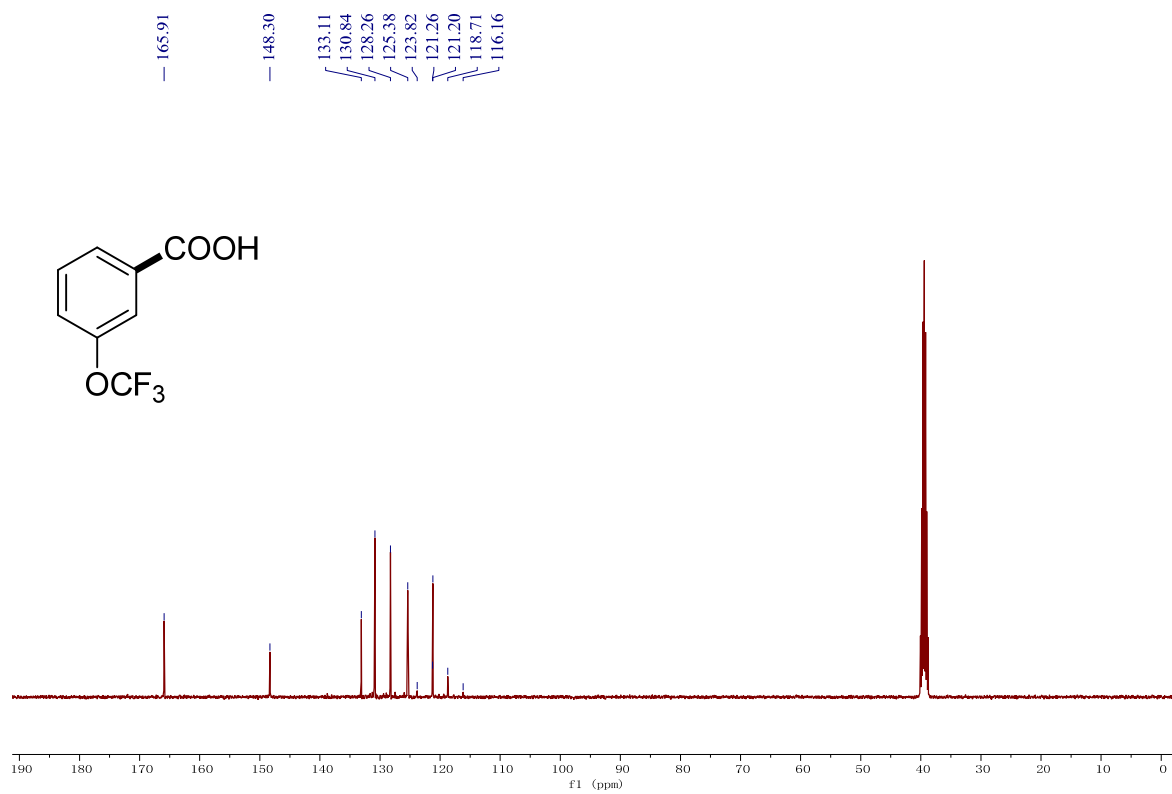

$^{19}\text{F}$  NMR spectrum of **13**

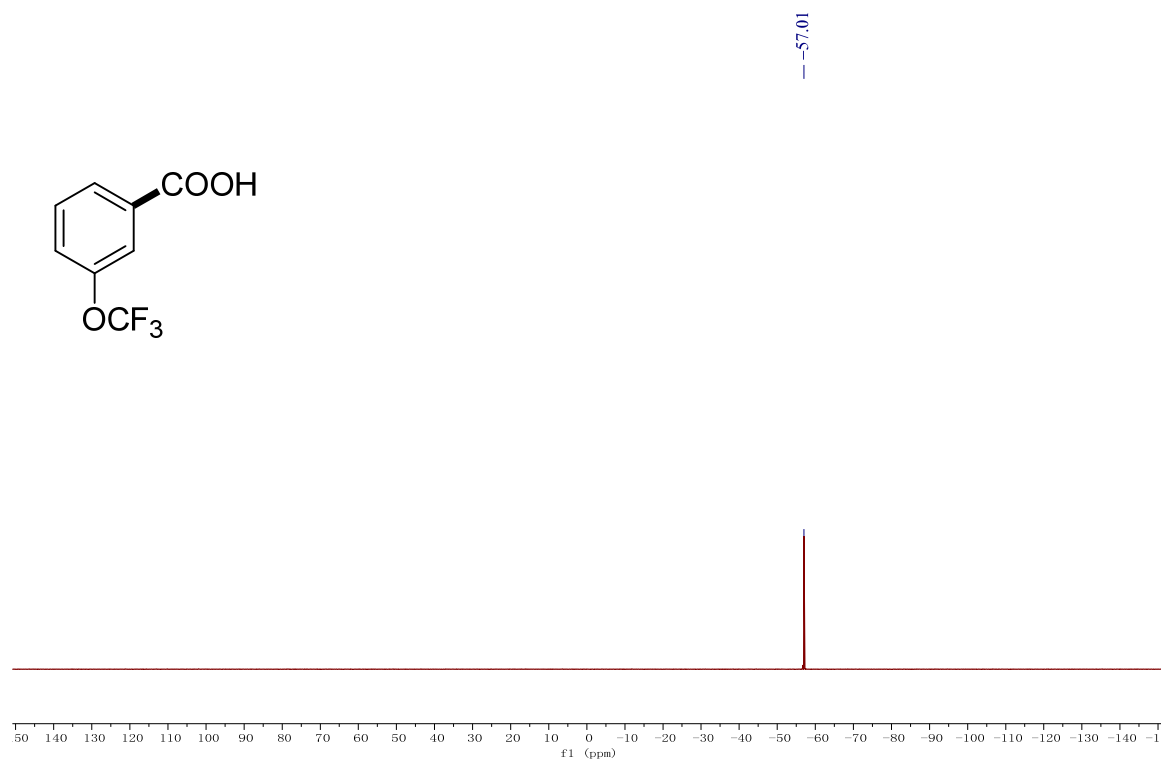

$^1\text{H}$  NMR spectrum of **14**

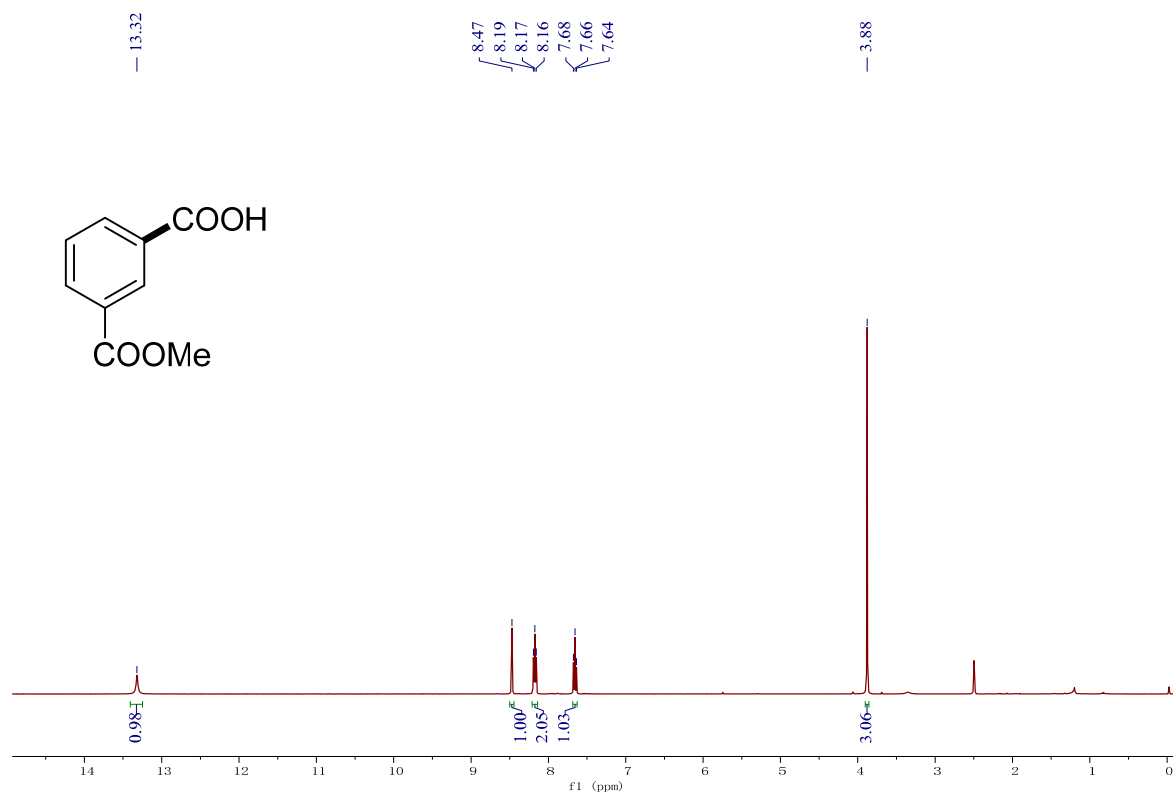

### $^{13}\text{C}$ NMR spectrum of **14**

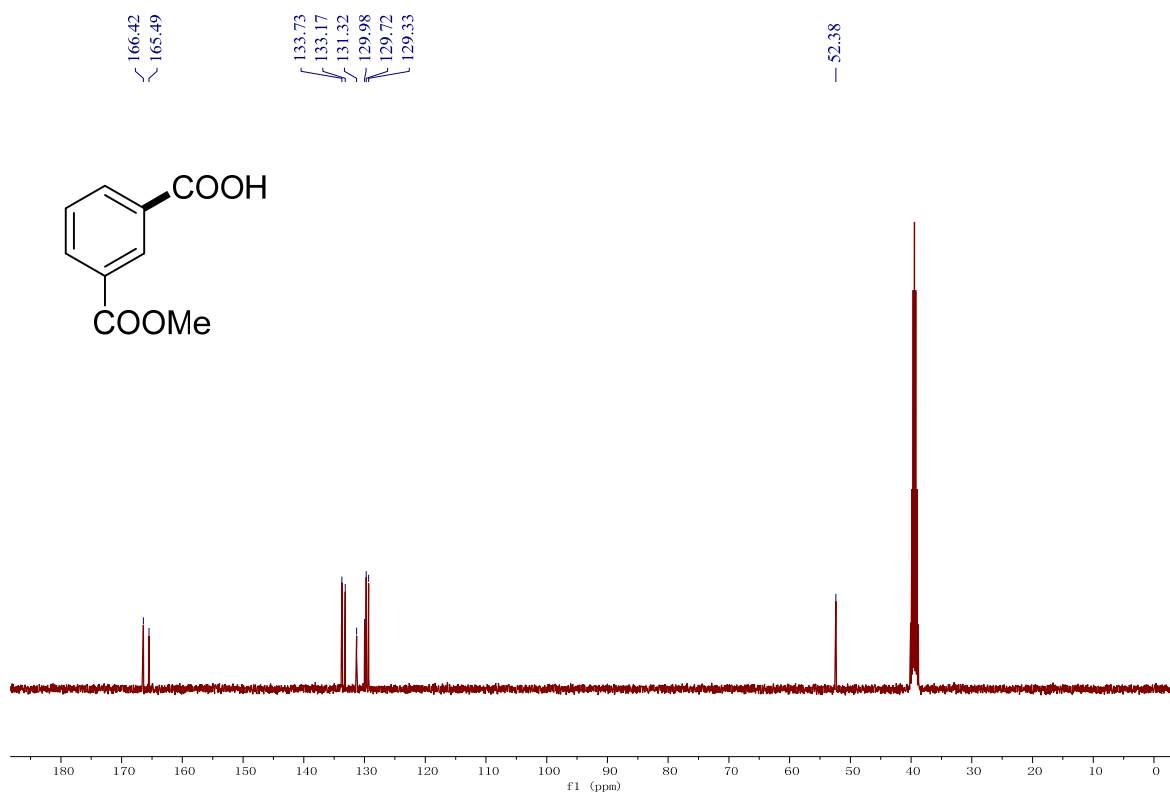

### $^1\text{H}$ NMR spectrum of **15**

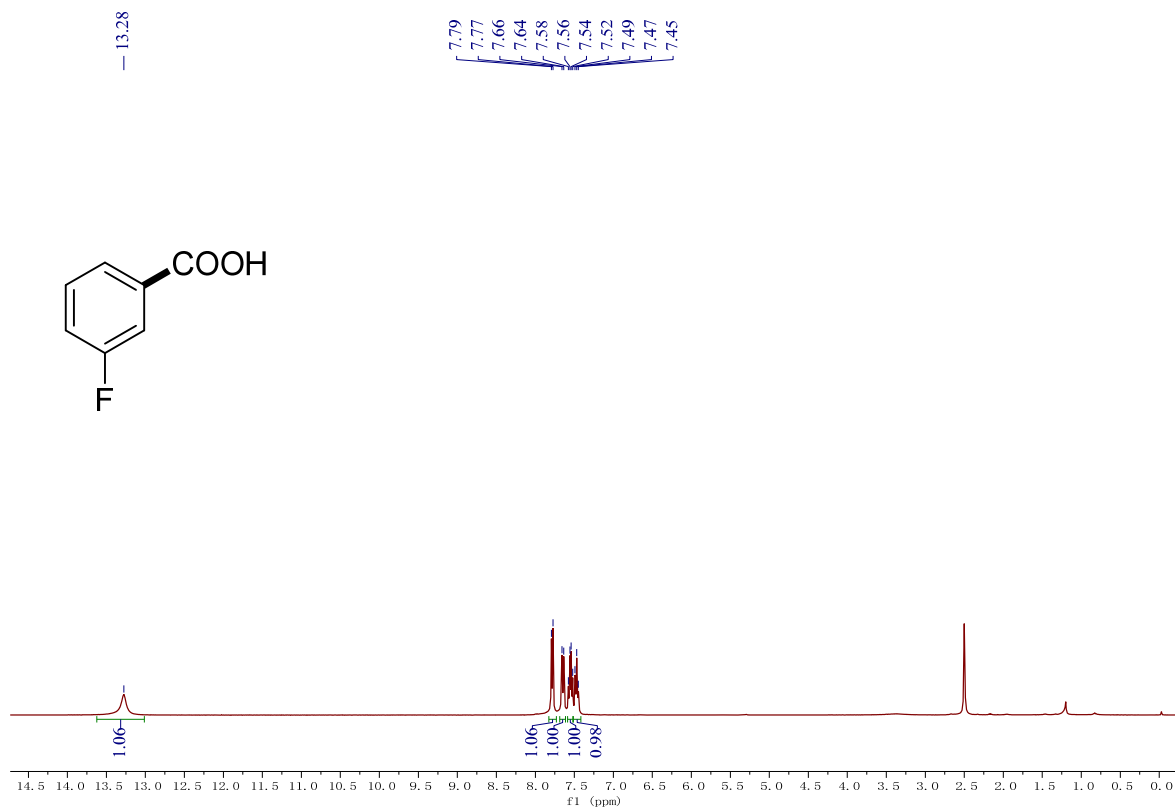

### $^{13}\text{C}$ NMR spectrum of **15**

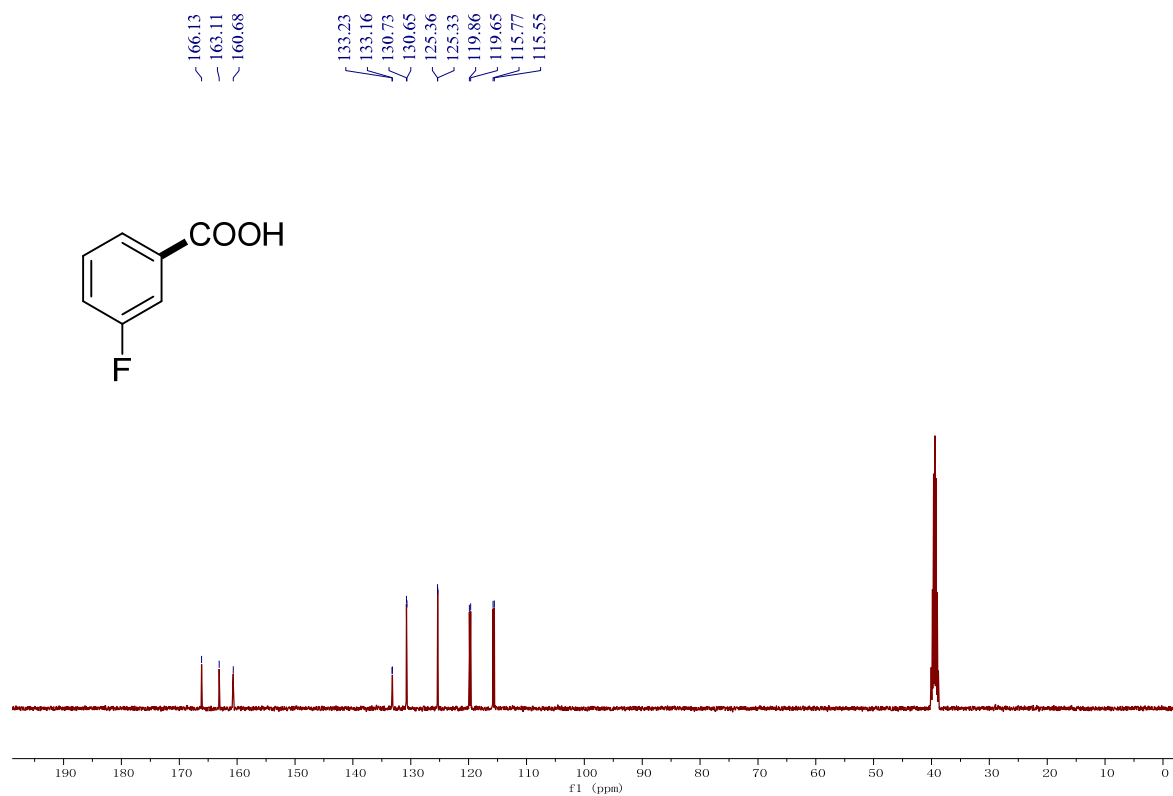

### $^{19}\text{F}$ NMR spectrum of **15**

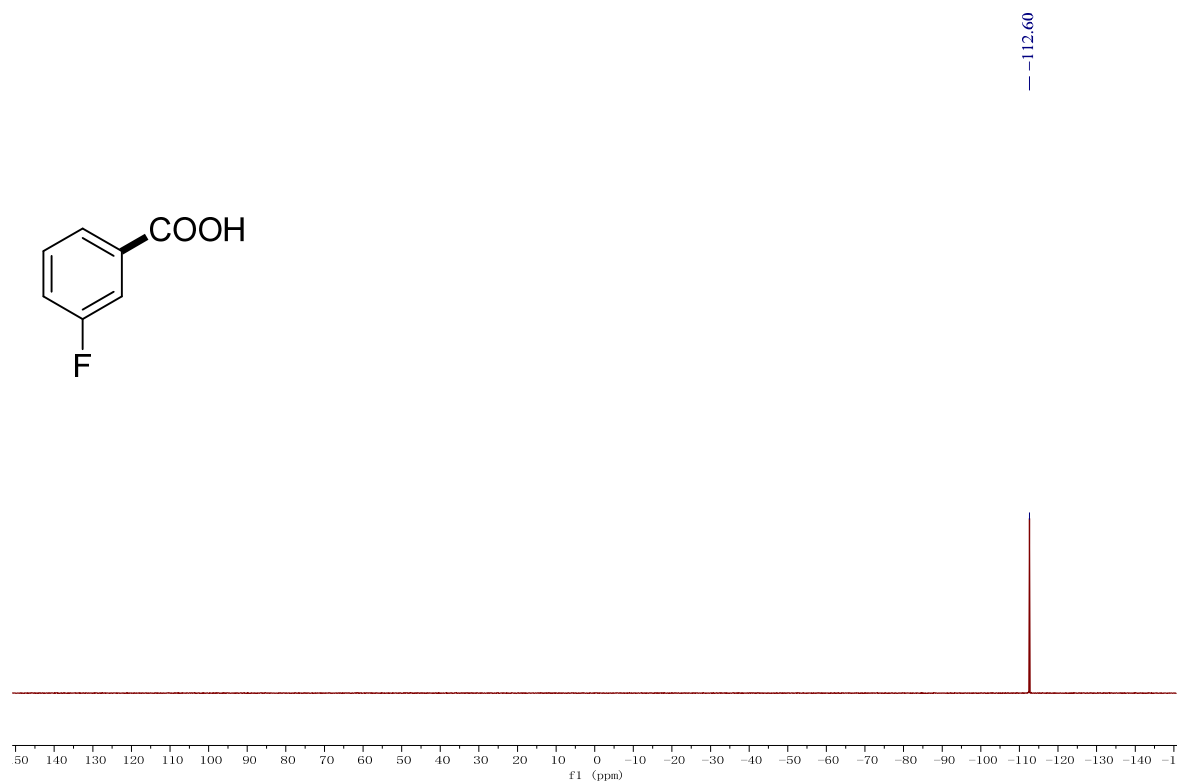



# <sup>1</sup>H NMR spectrum of 16

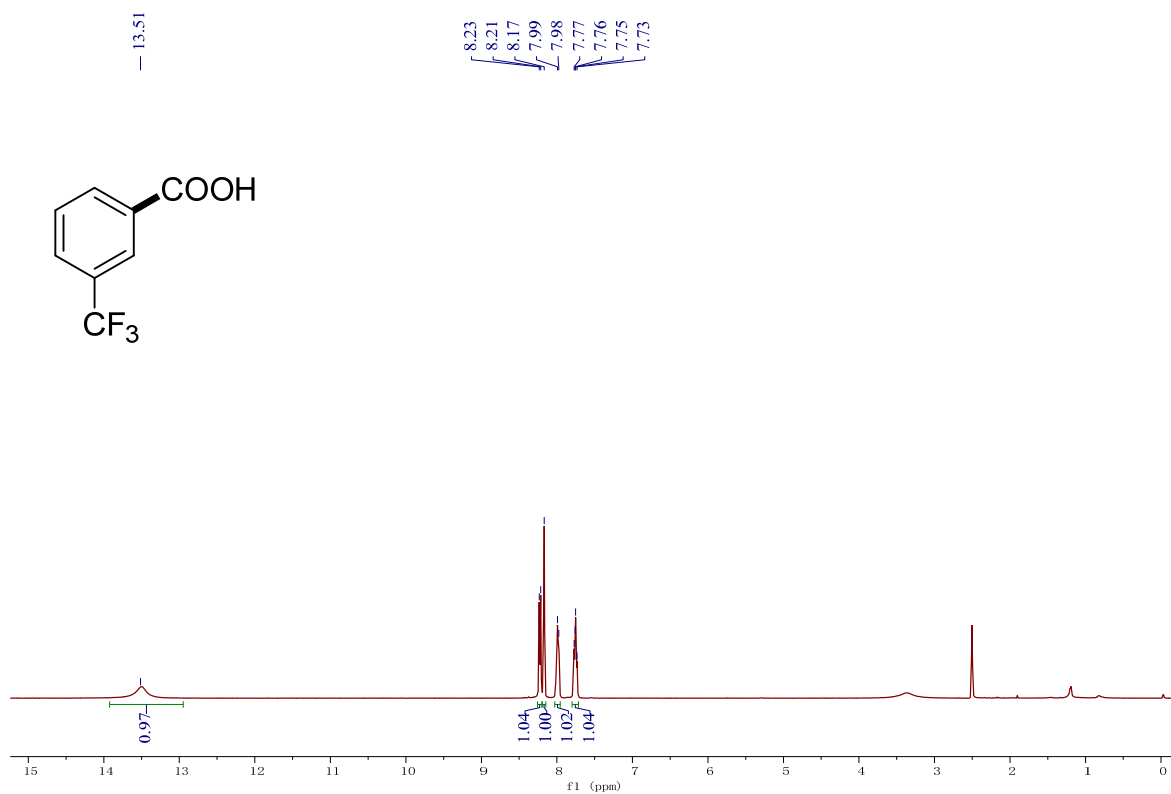

# <sup>13</sup>C NMR spectrum of 16

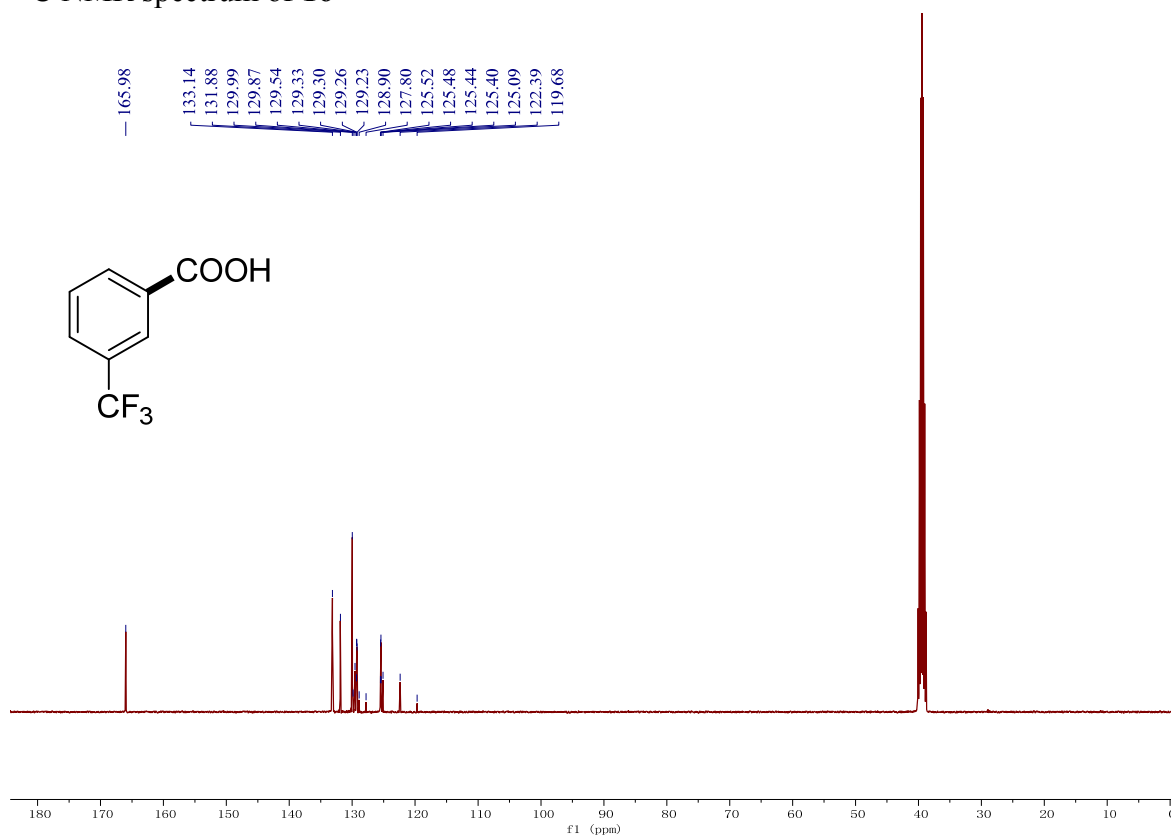

### $^{19}\text{F}$ NMR spectrum of **16**

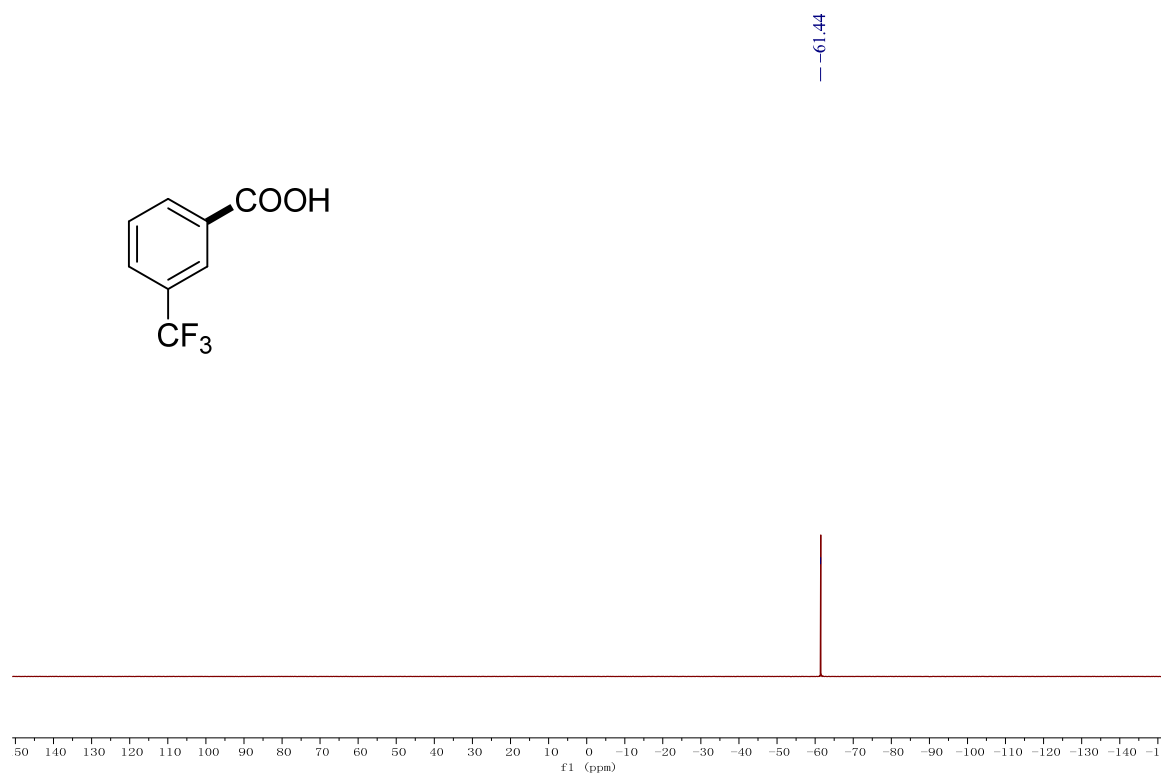

### $^1\text{H}$ NMR spectrum of **17**

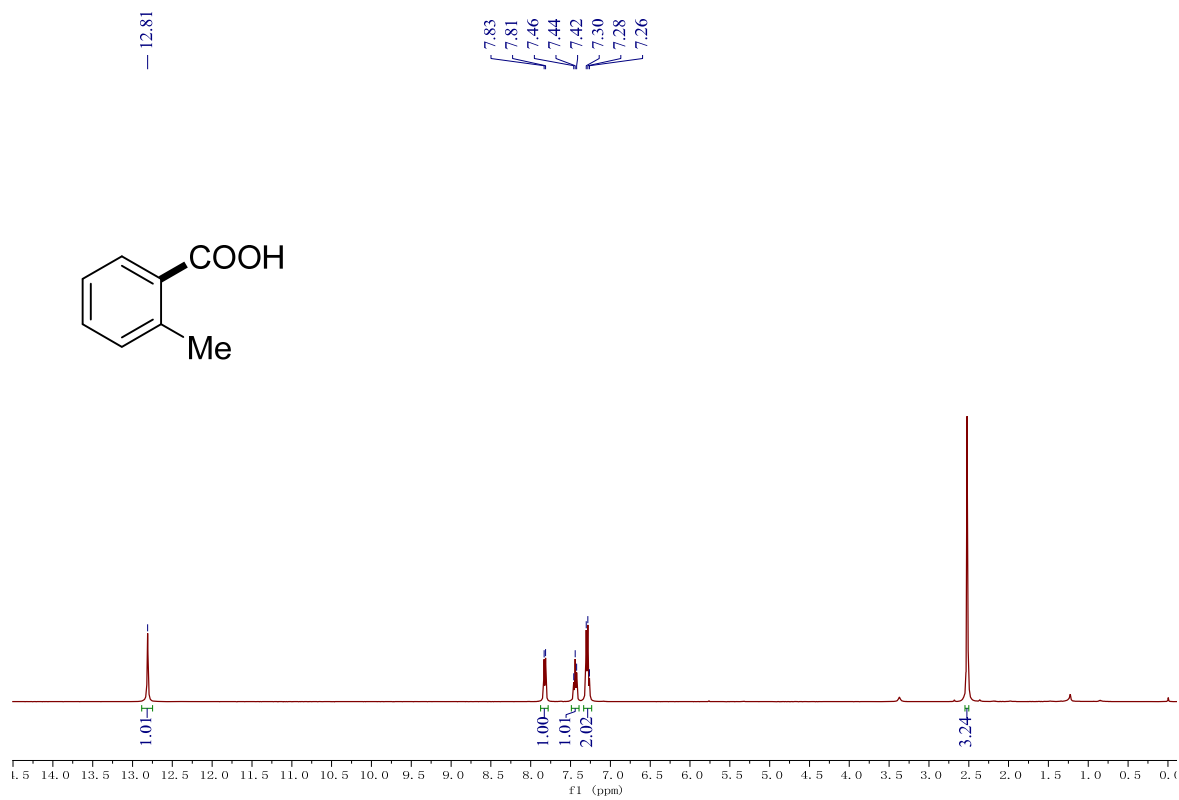

### $^{13}\text{C}$ NMR spectrum of 17

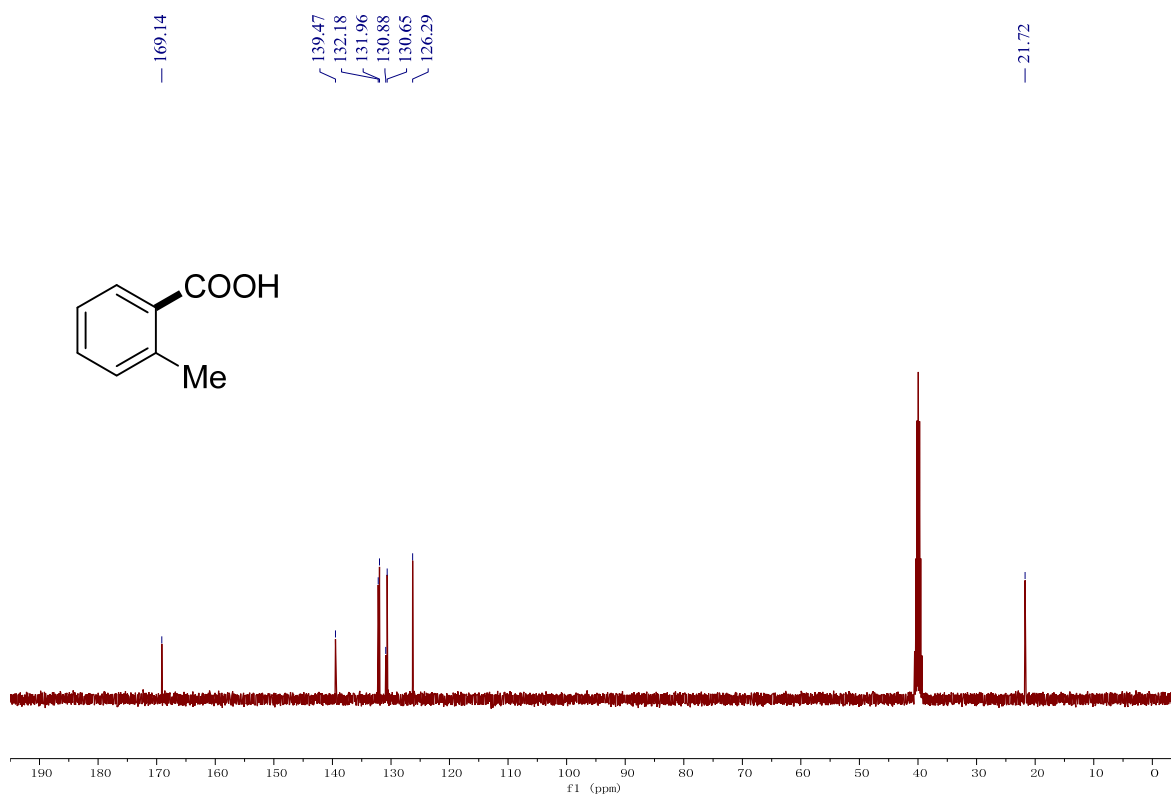

### $^1\text{H}$ NMR spectrum of 18

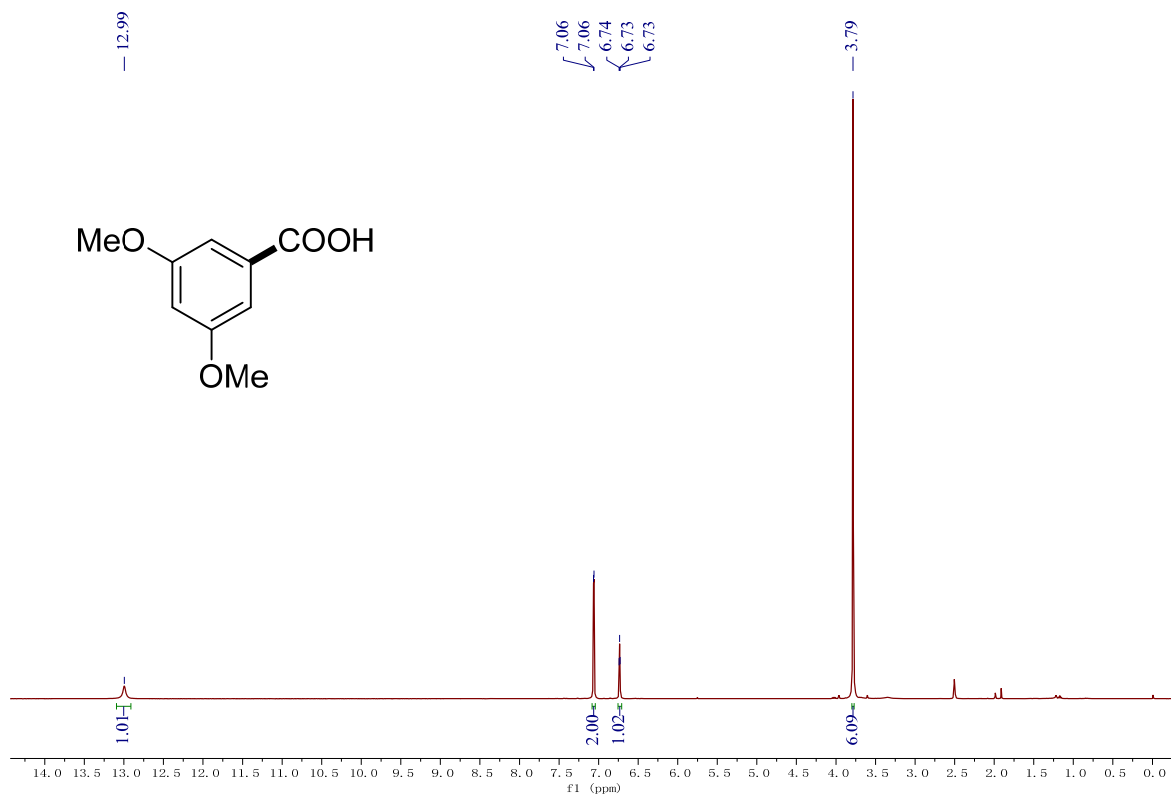

$^{13}\text{C}$  NMR spectrum of **18**

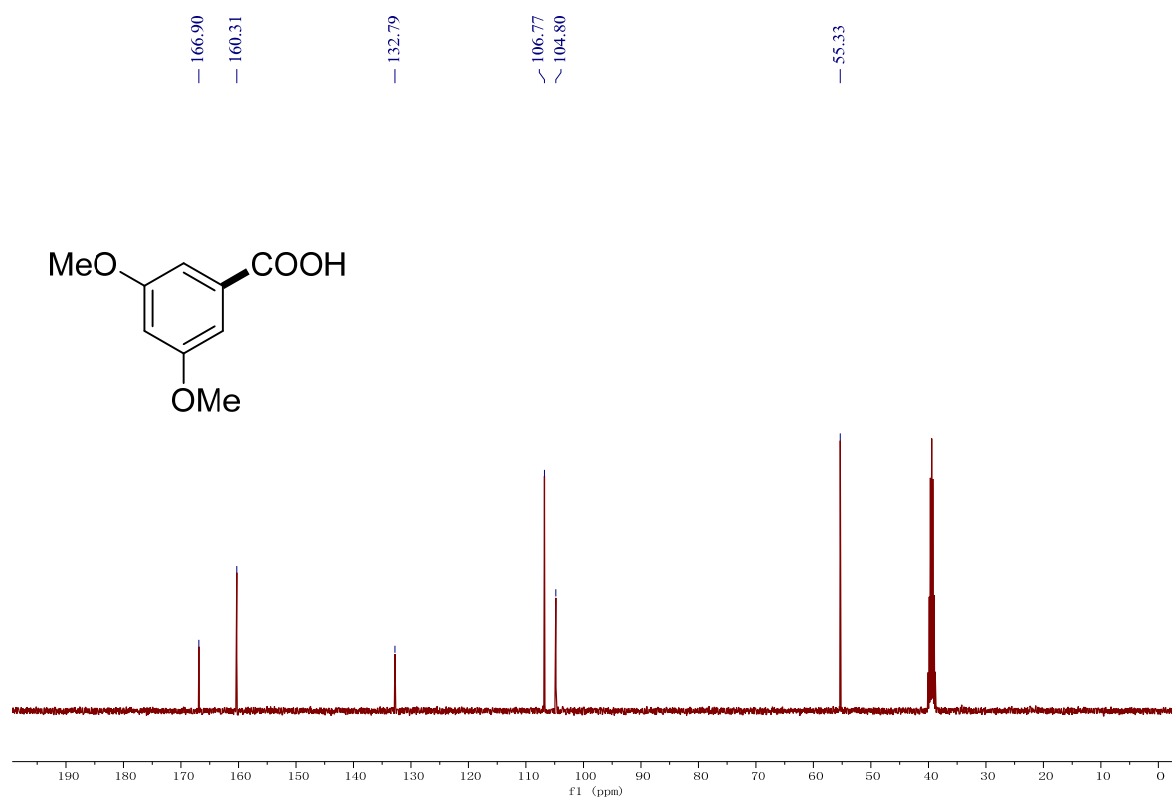

$^1\text{H}$  NMR spectrum of **19**

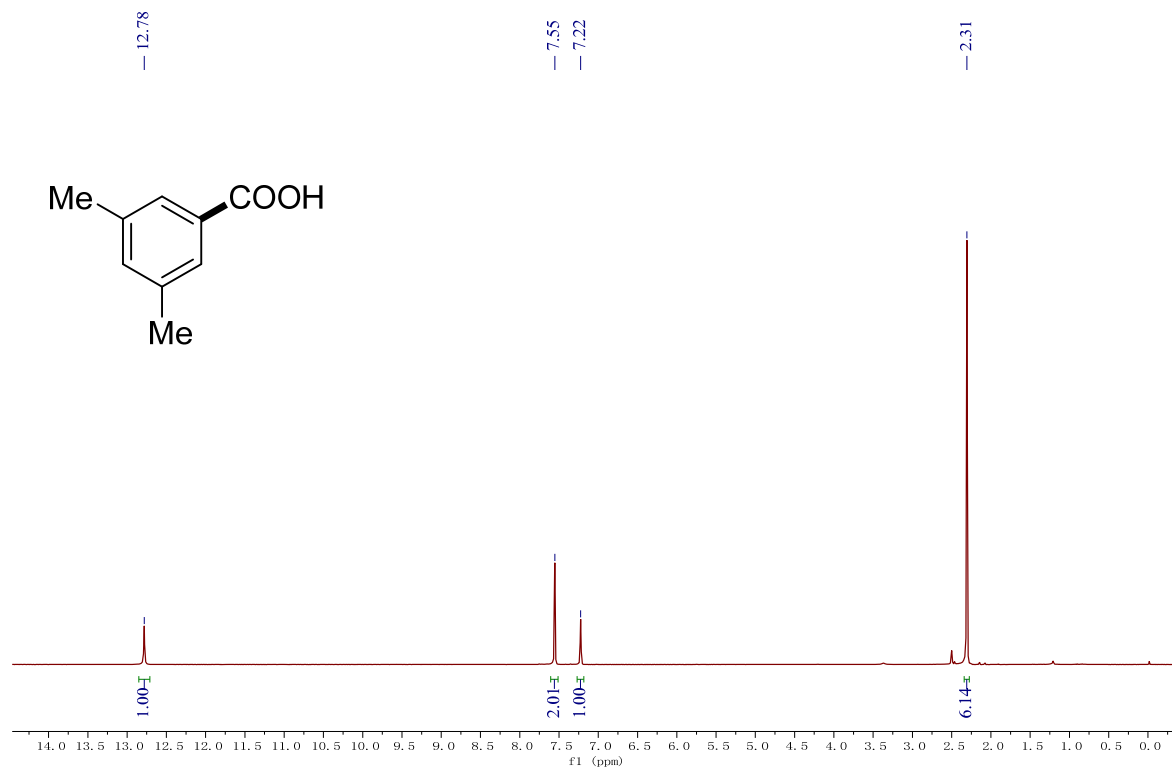

### $^{13}\text{C}$ NMR spectrum of **19**

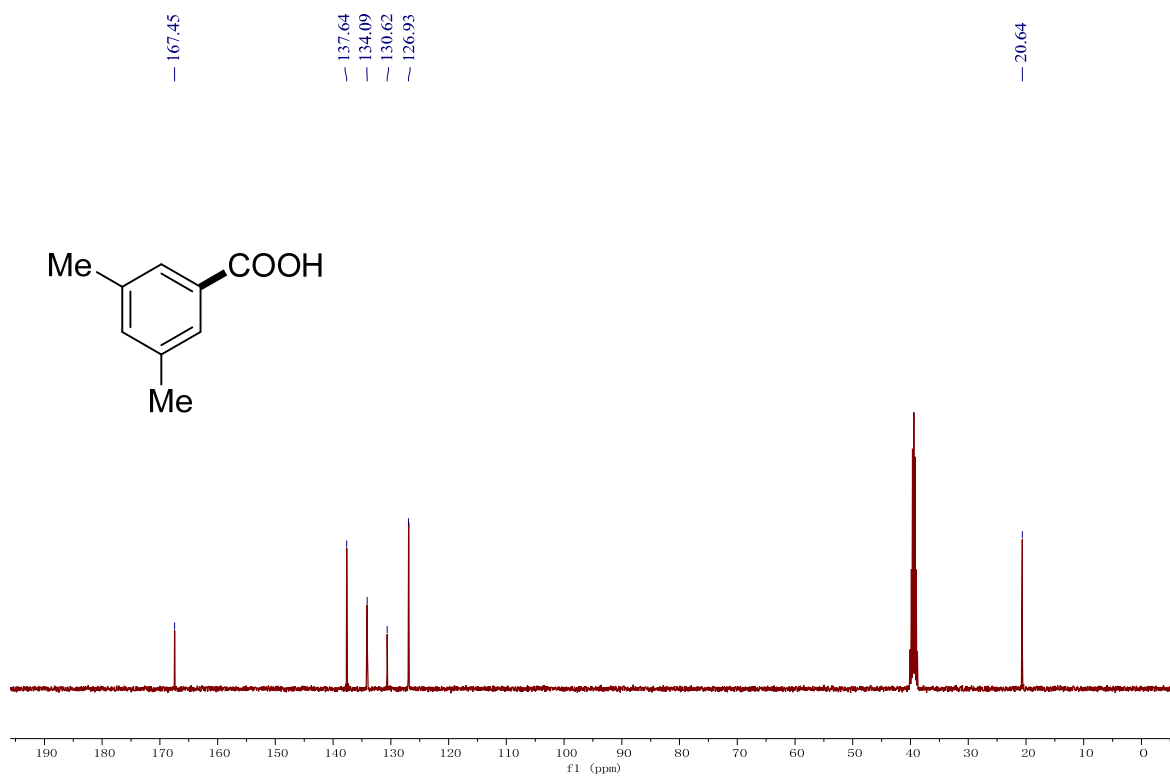

### $^1\text{H}$ NMR spectrum of **20**

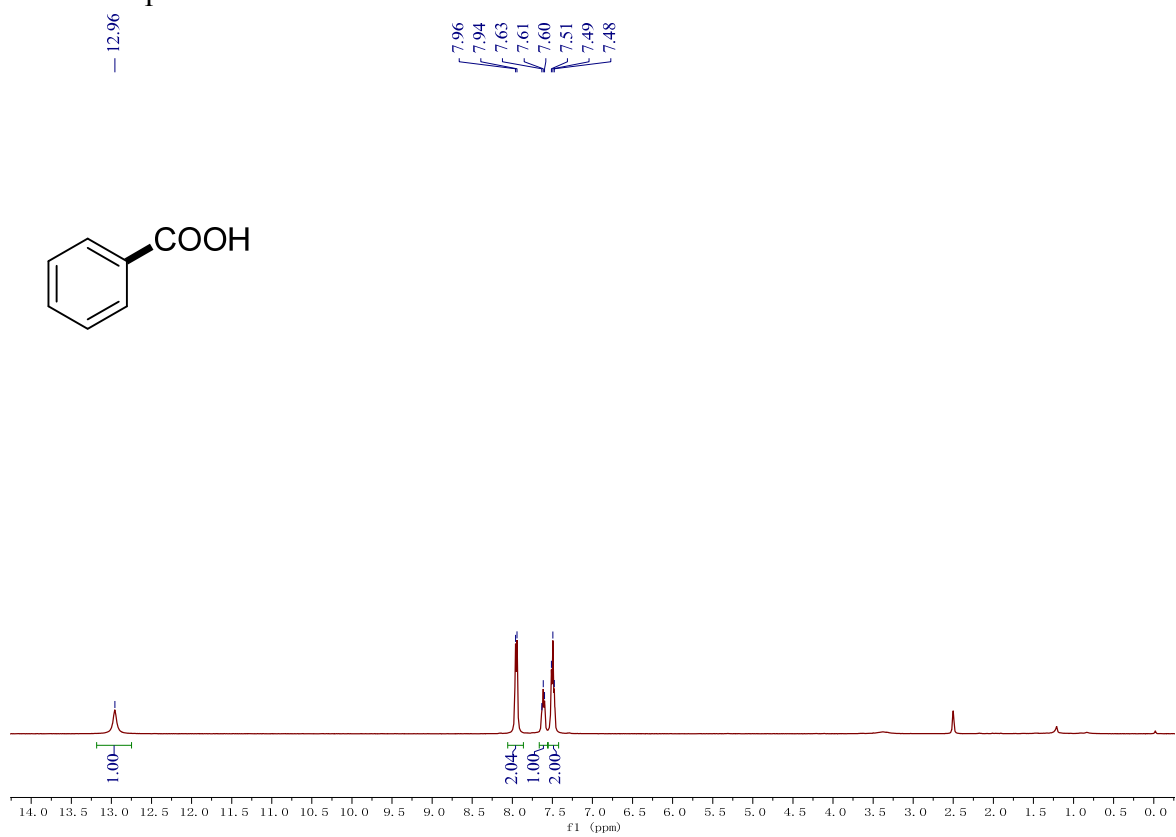

### $^{13}\text{C}$ NMR spectrum of **20**

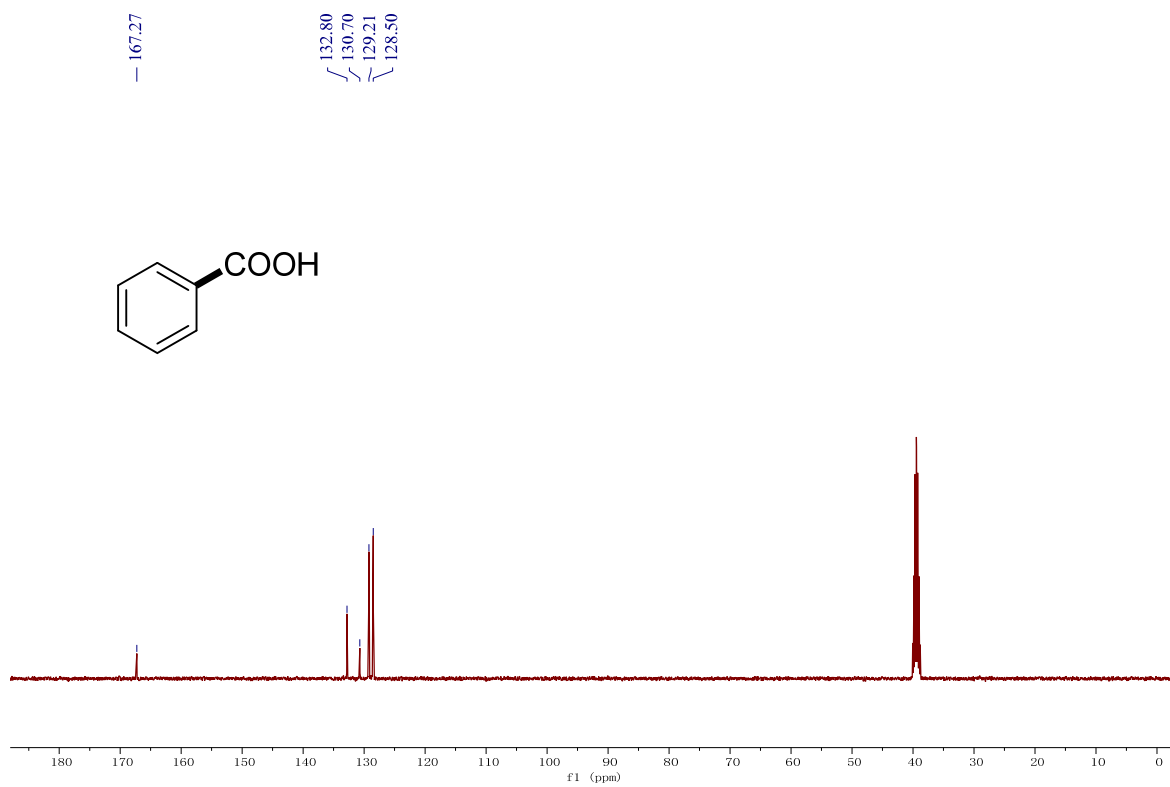

### $^1\text{H}$ NMR spectrum of **21**

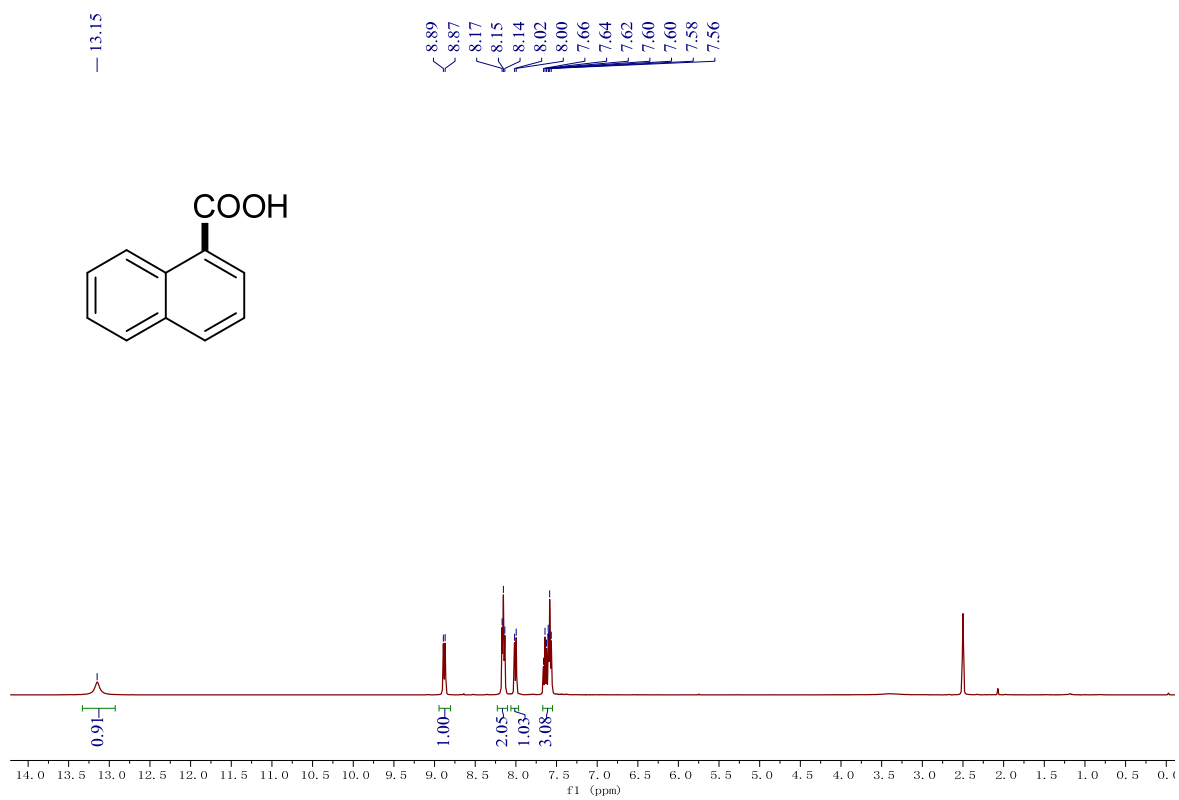

### $^{13}\text{C}$ NMR spectrum of **21**

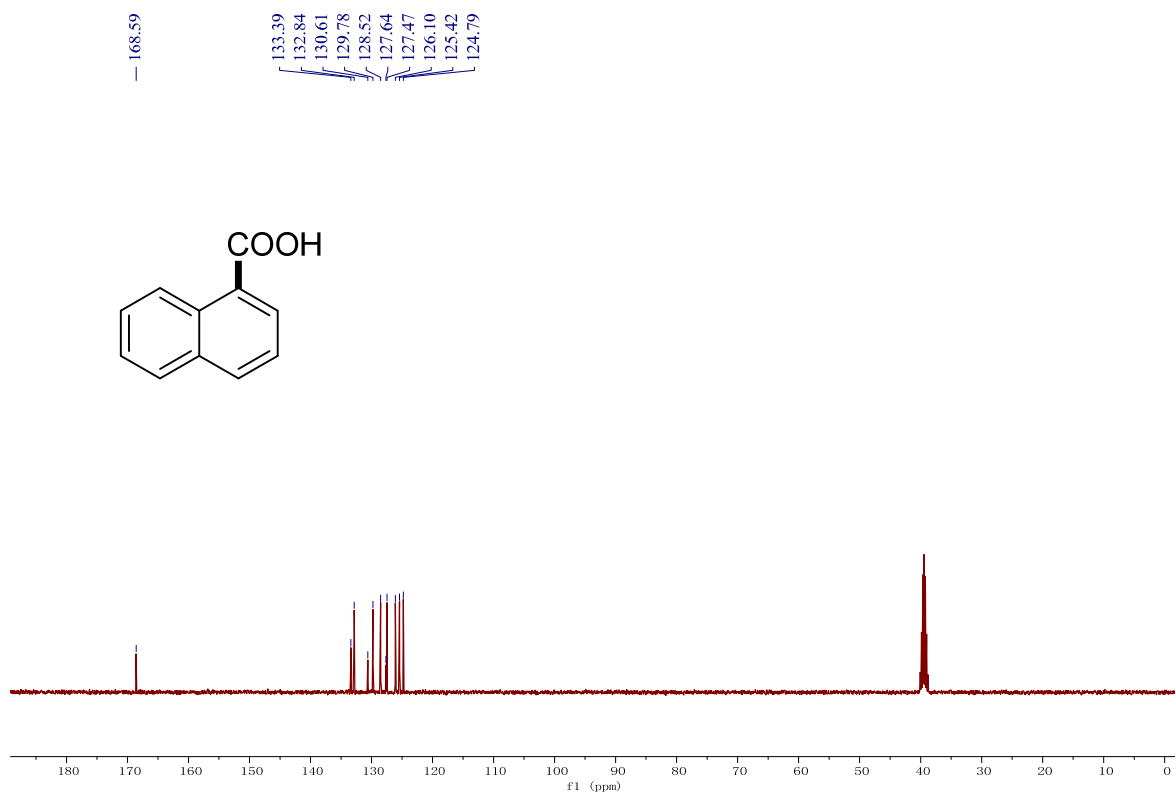

### $^1\text{H}$ NMR spectrum of **22**

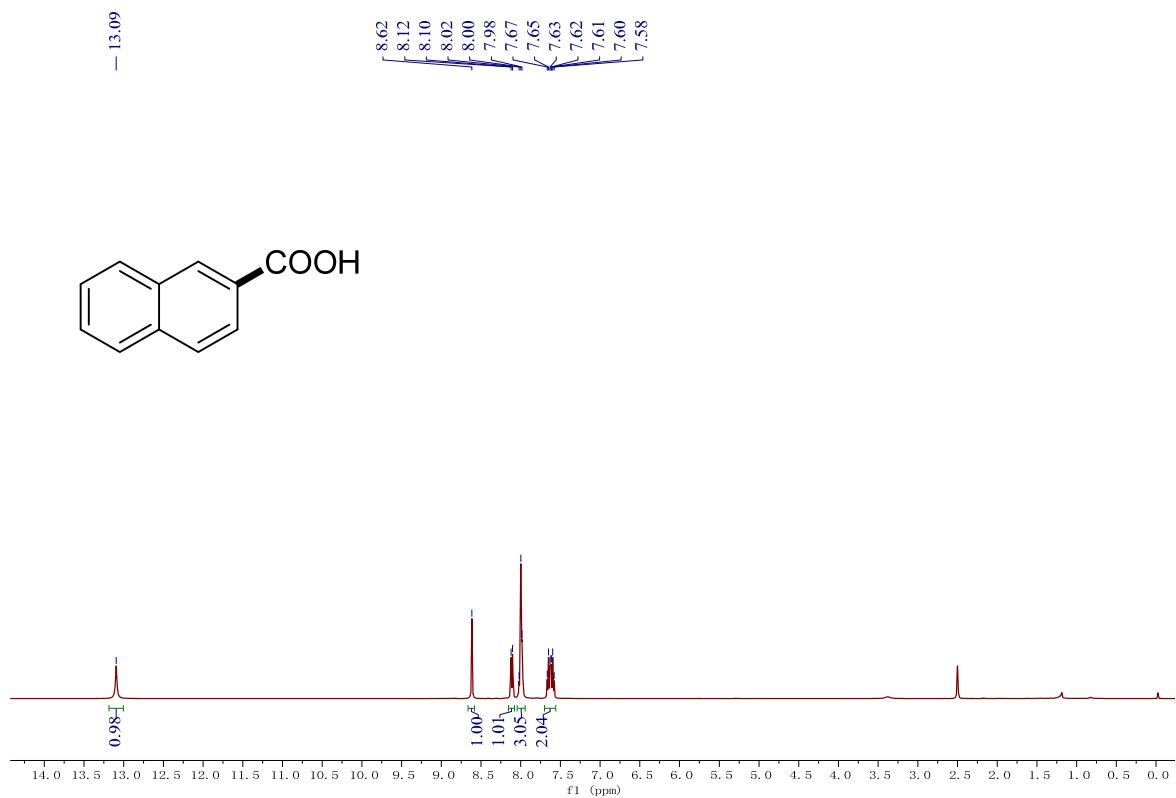

### $^{13}\text{C}$ NMR spectrum of **22**

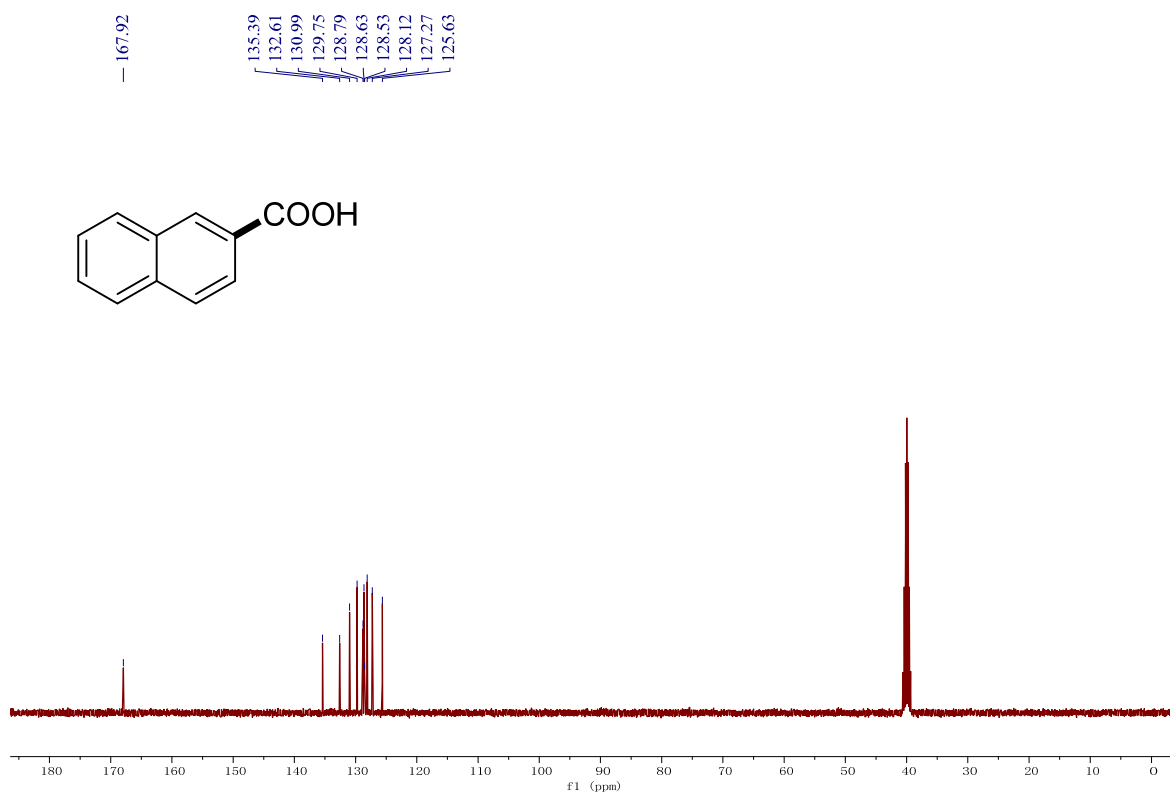

### $^1\text{H}$ NMR spectrum of **23**

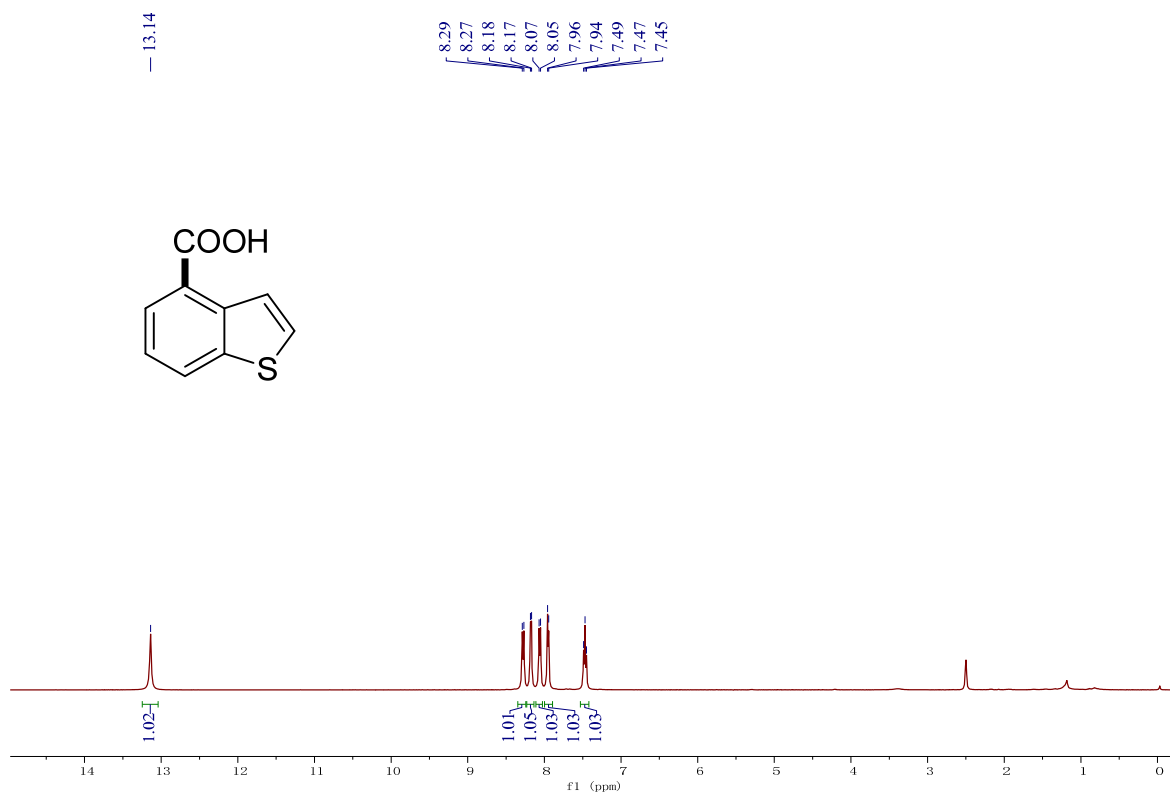



### $^{13}\text{C}$ NMR spectrum of **23**

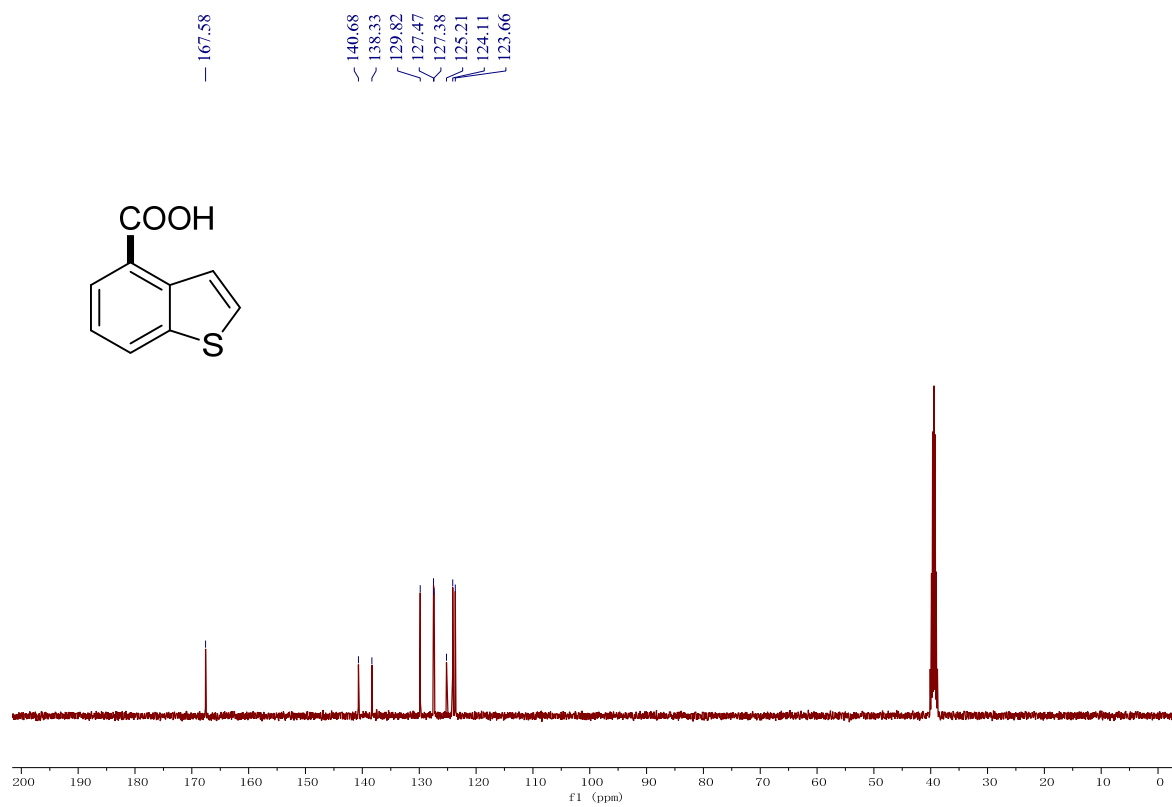

### $^1\text{H}$ NMR spectrum of **24**

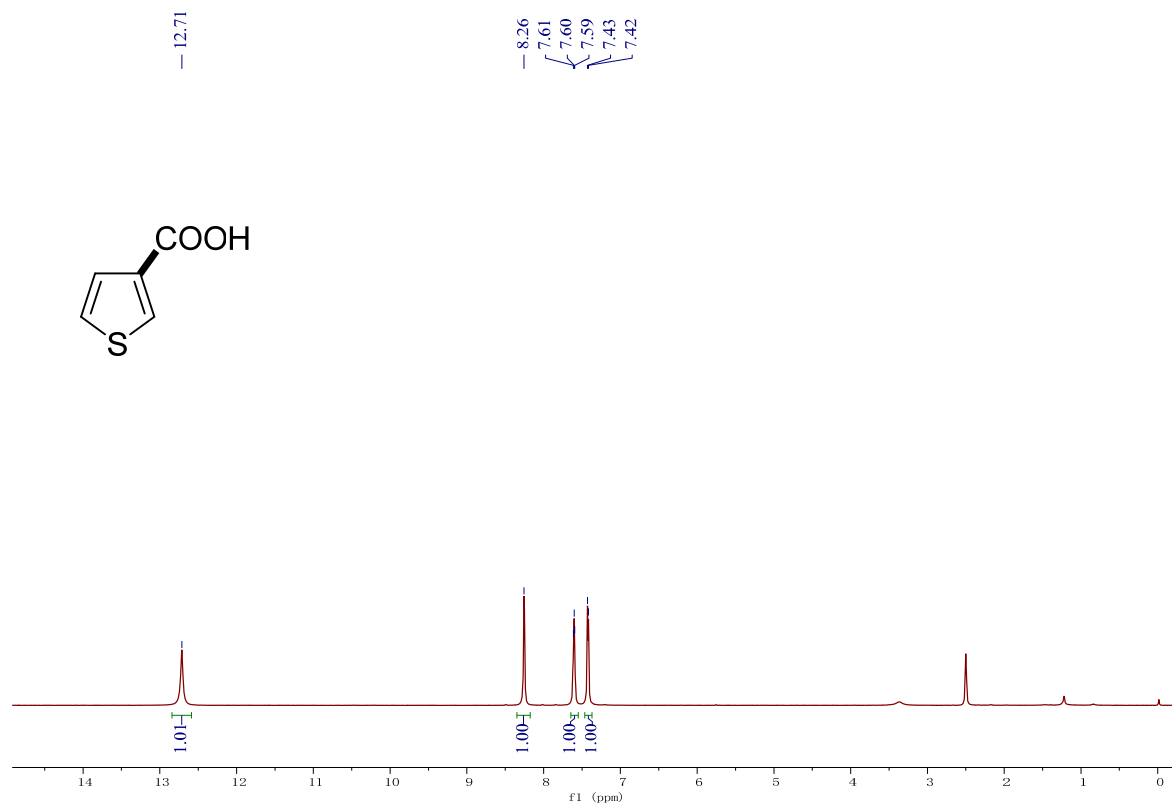

### <sup>13</sup>C NMR spectrum of **24**

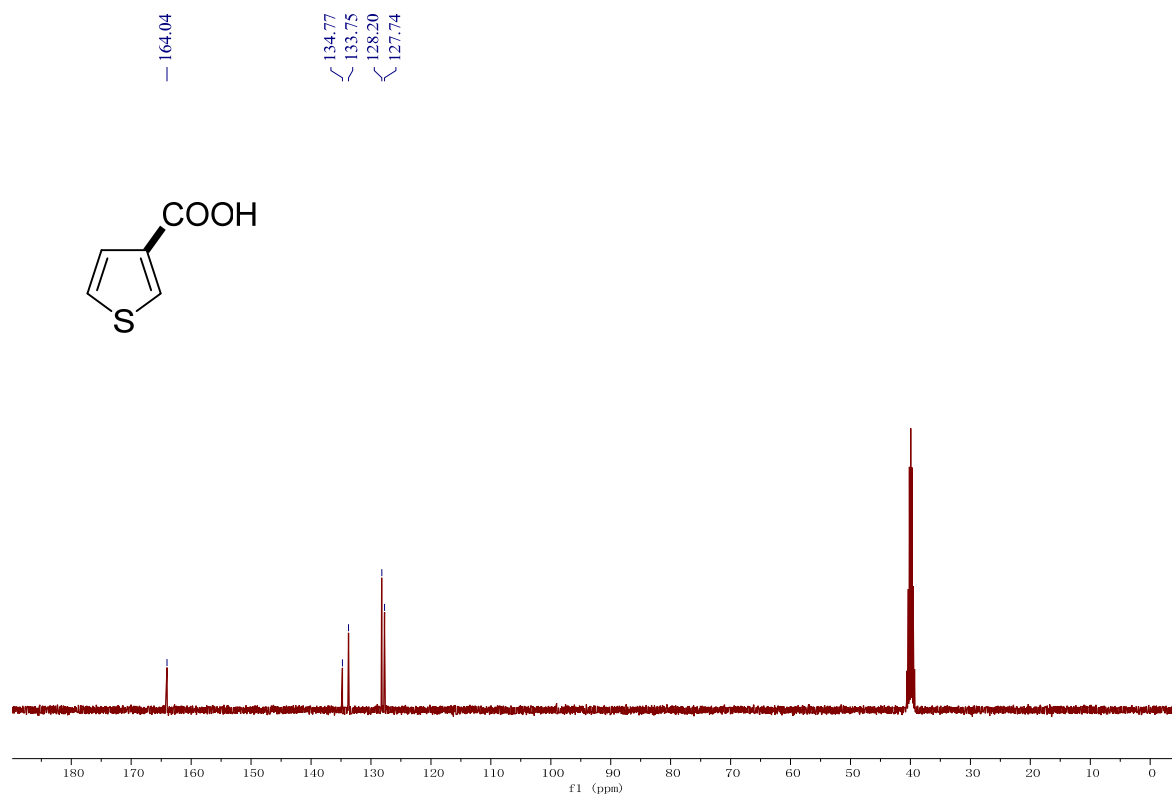

### <sup>1</sup>H NMR spectrum of **25**

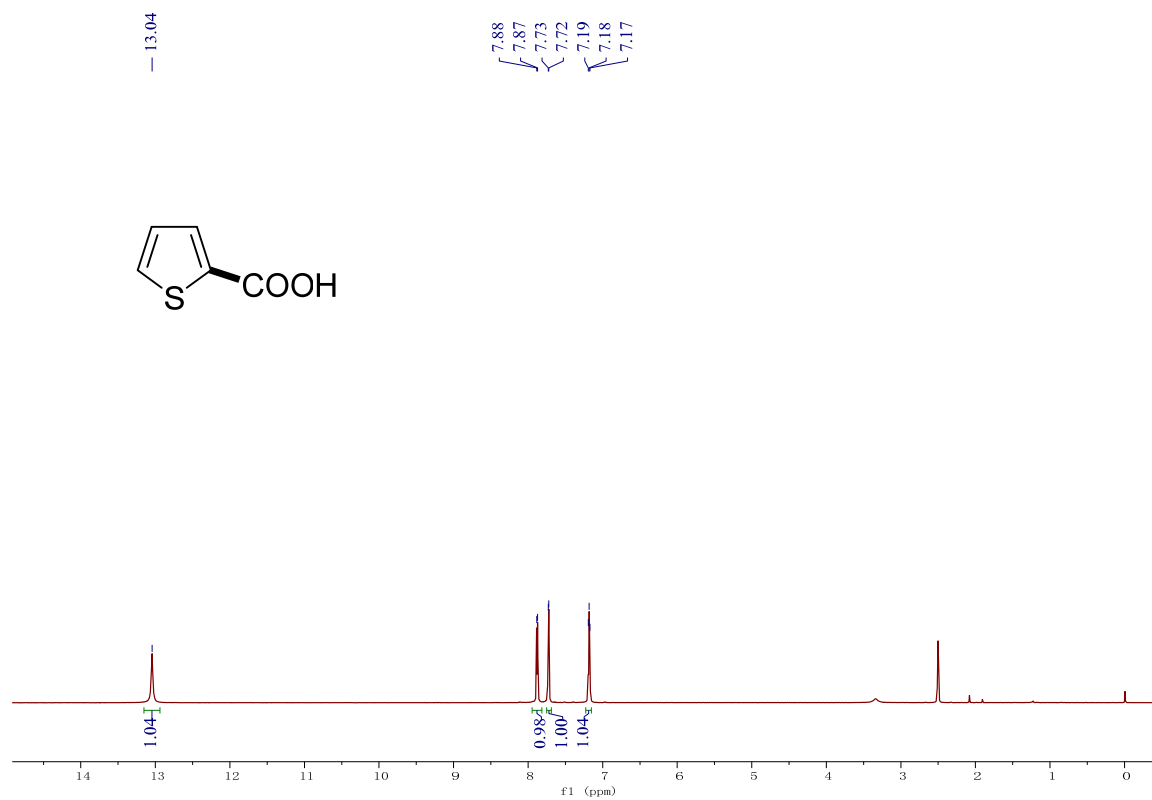

$^{13}\text{C}$  NMR spectrum of **25**

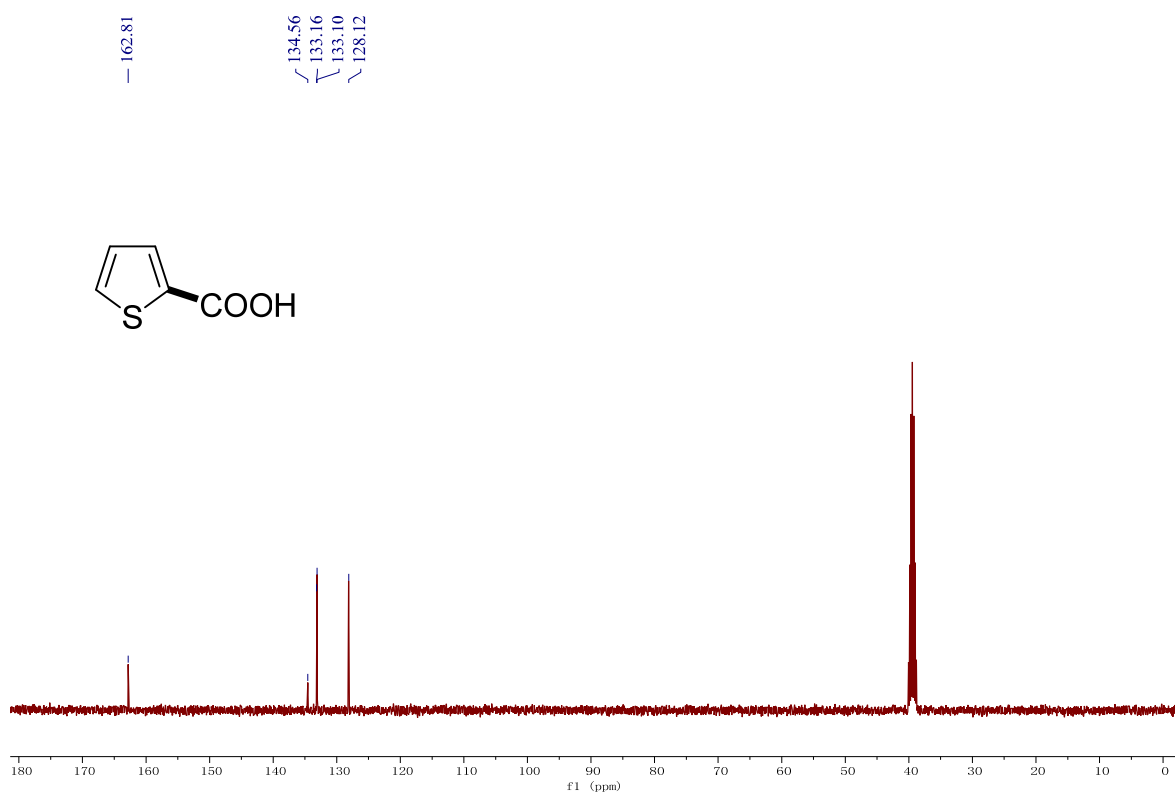

$^1\text{H}$  NMR spectrum of **26**

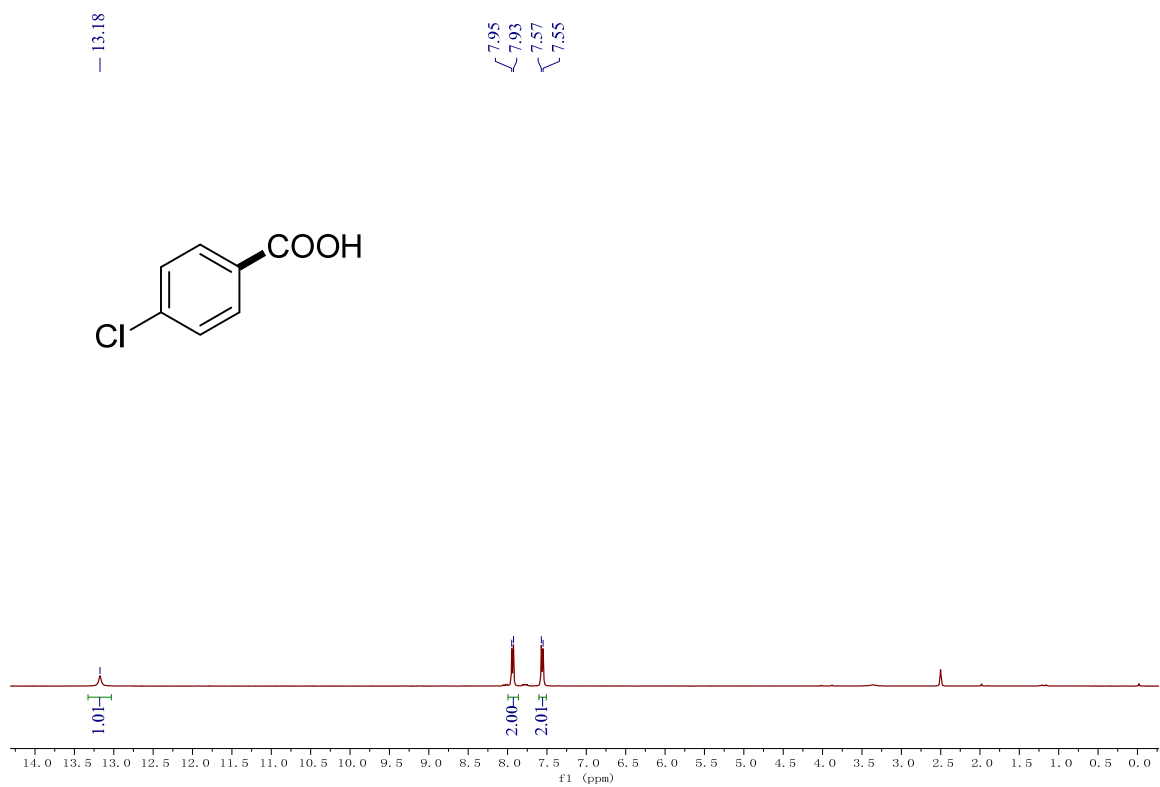

$^{13}\text{C}$  NMR spectrum of **26**

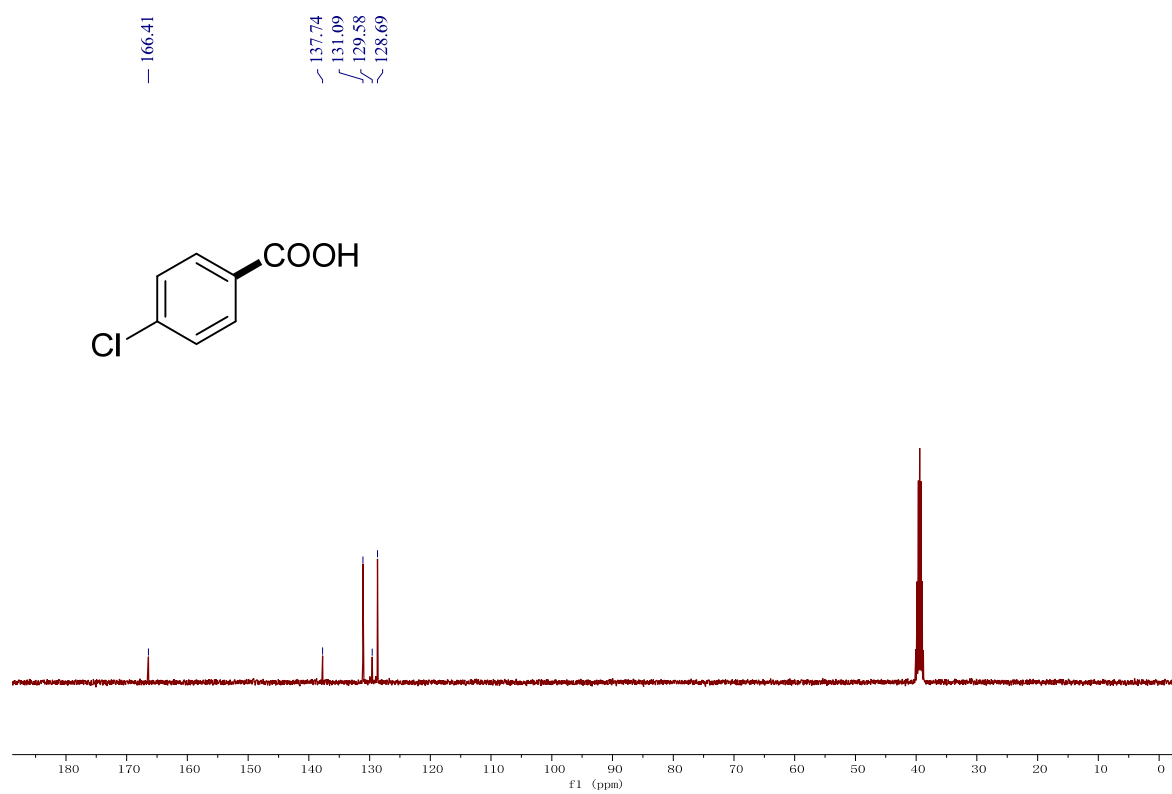

$^1\text{H}$  NMR spectrum of **27**

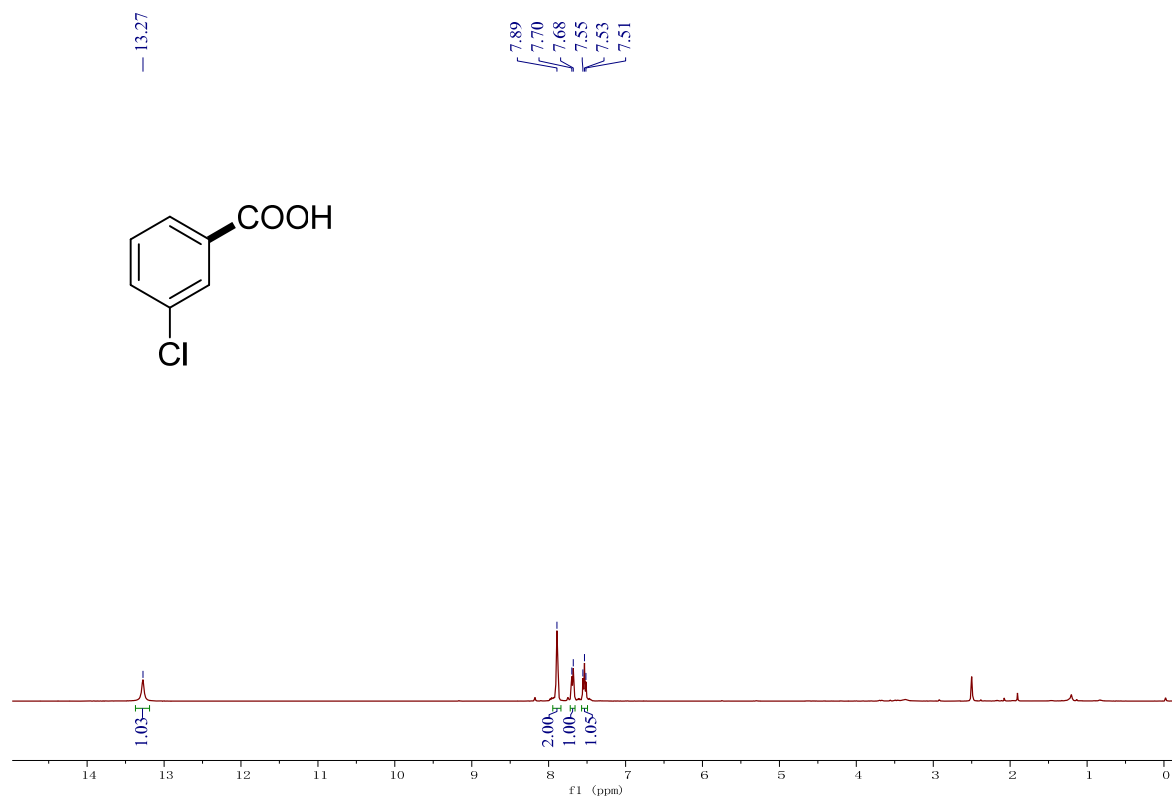

$^{13}\text{C}$  NMR spectrum of **27**

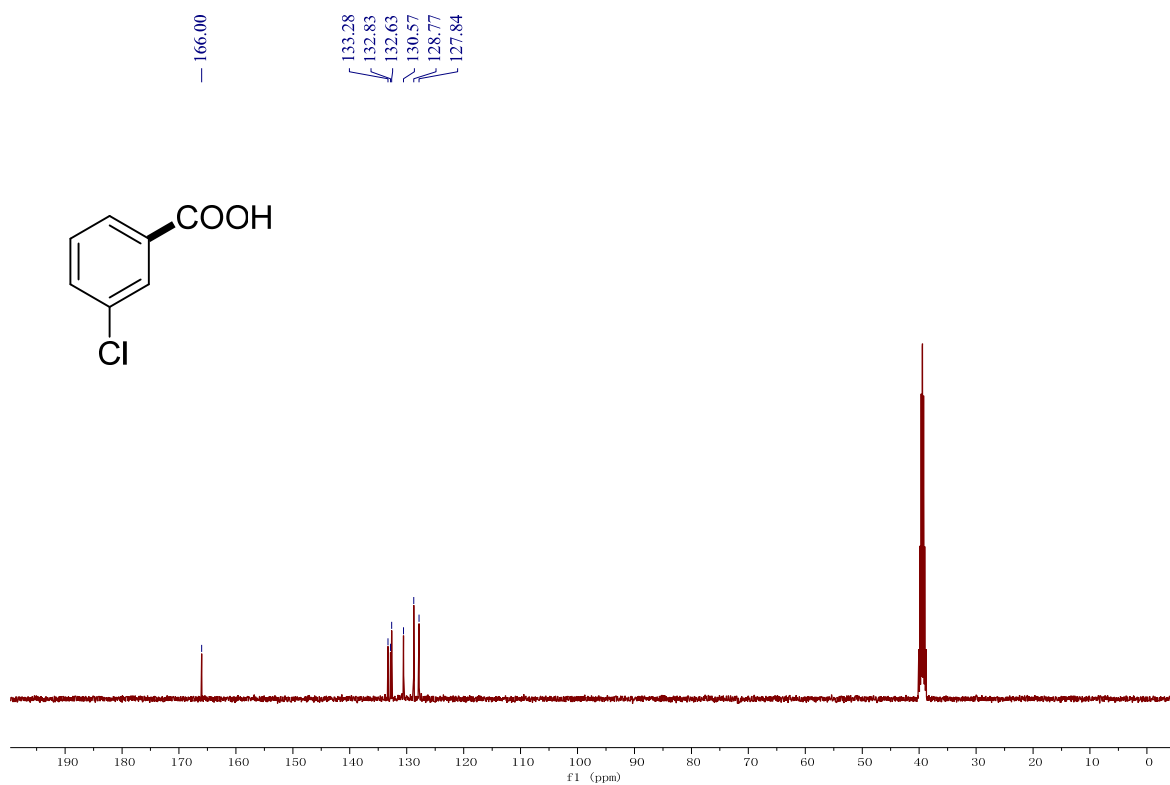

$^1\text{H}$  NMR spectrum of **28**

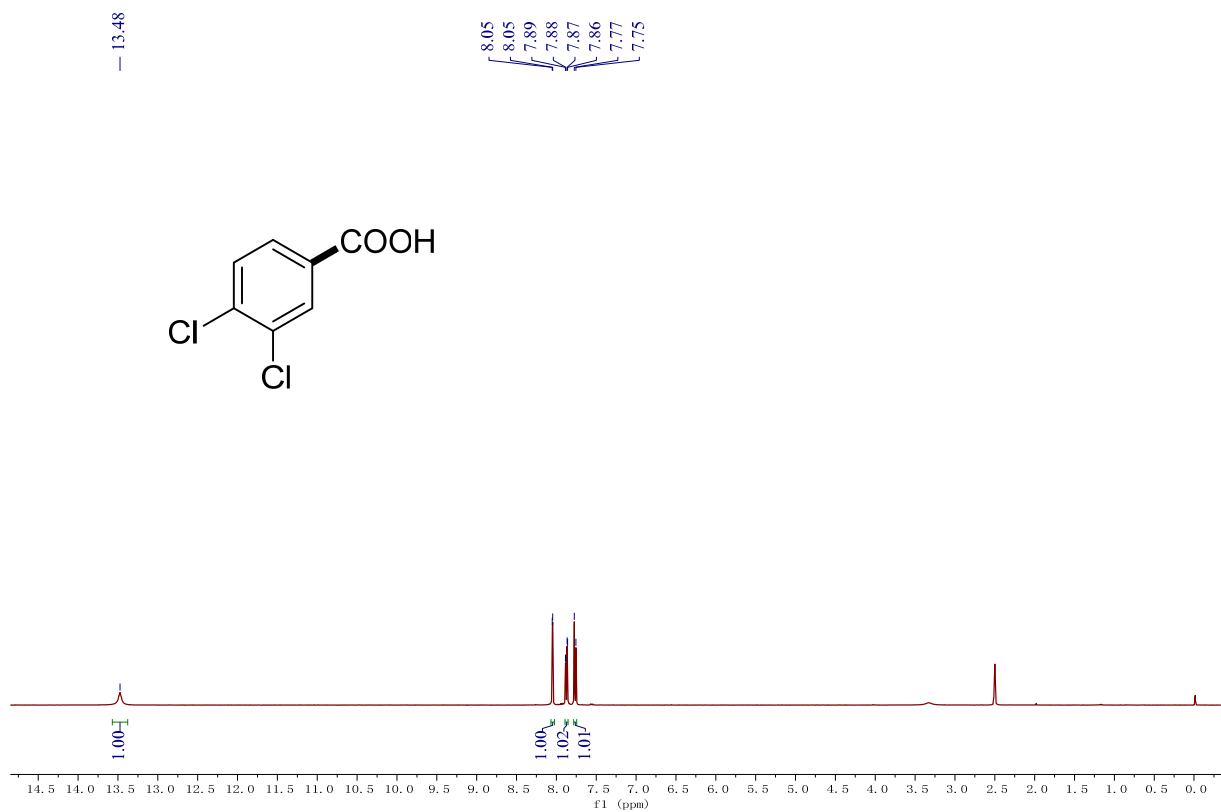

$^{13}\text{C}$  NMR spectrum of **28**

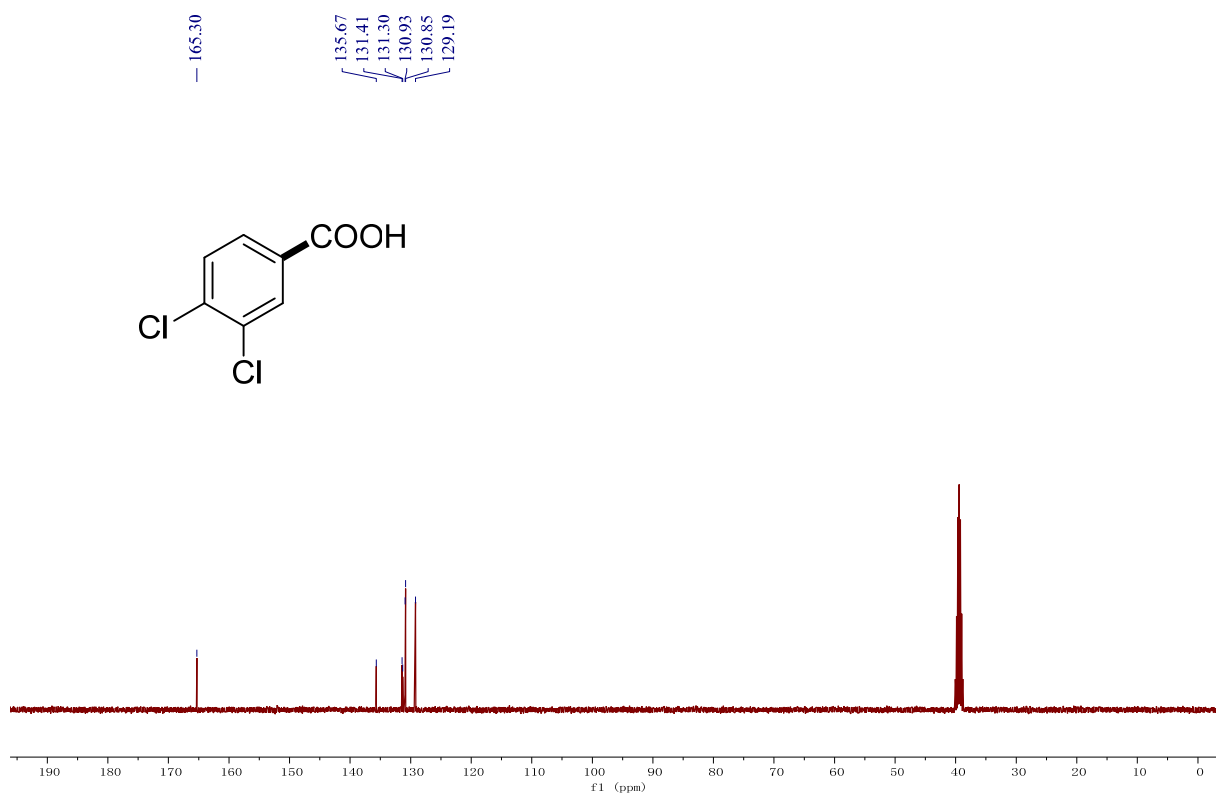

$^1\text{H}$  NMR spectrum of **29**

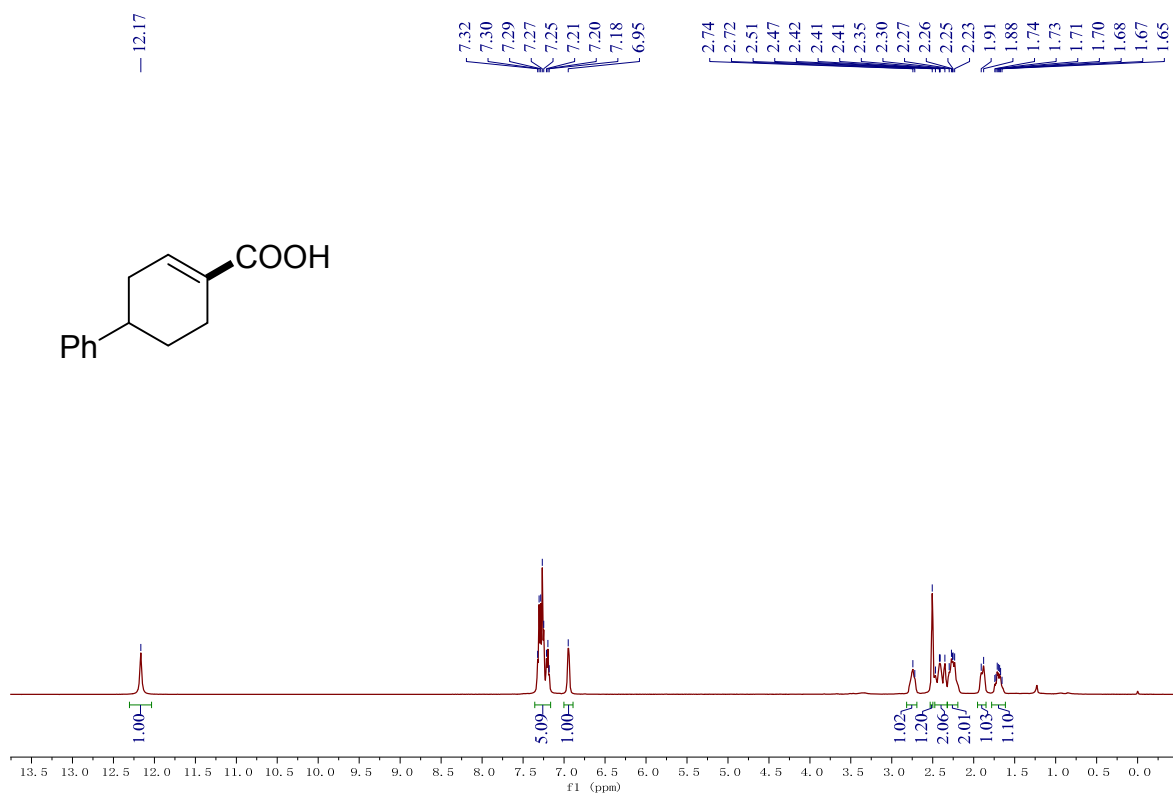

### $^{13}\text{C}$ NMR spectrum of **29**

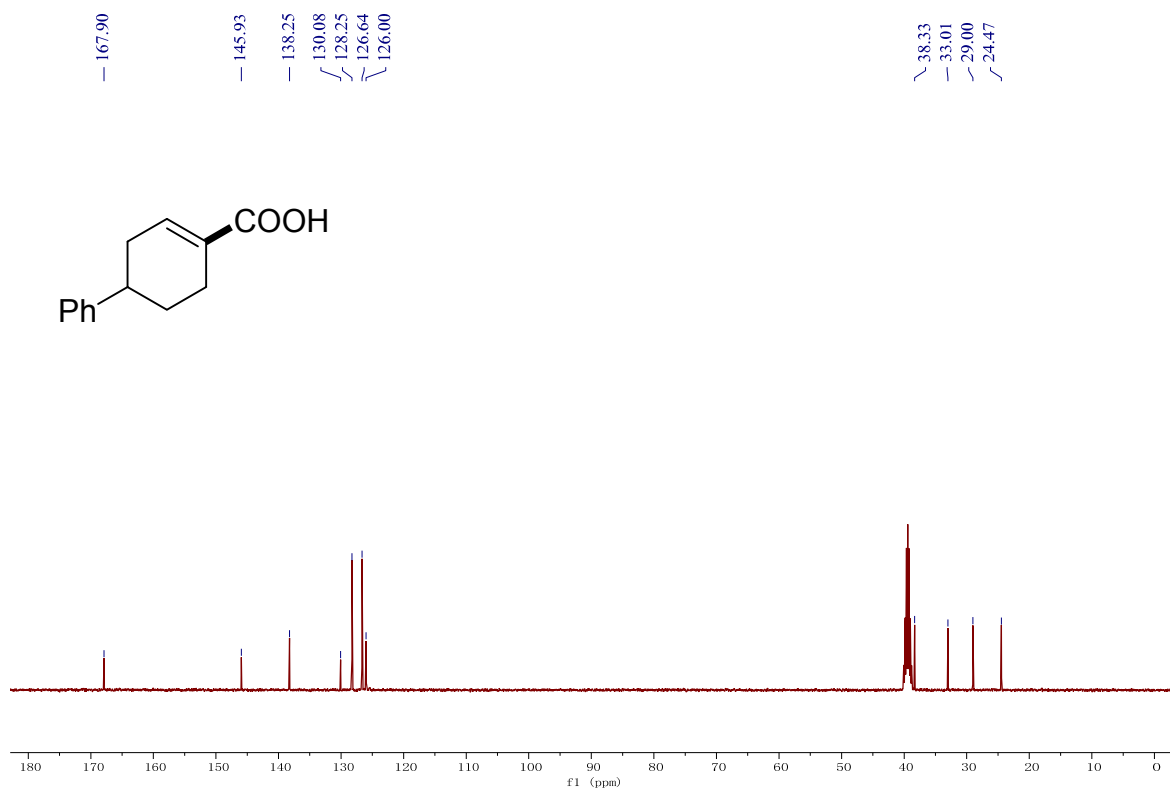

### $^1\text{H}$ NMR spectrum of **30**

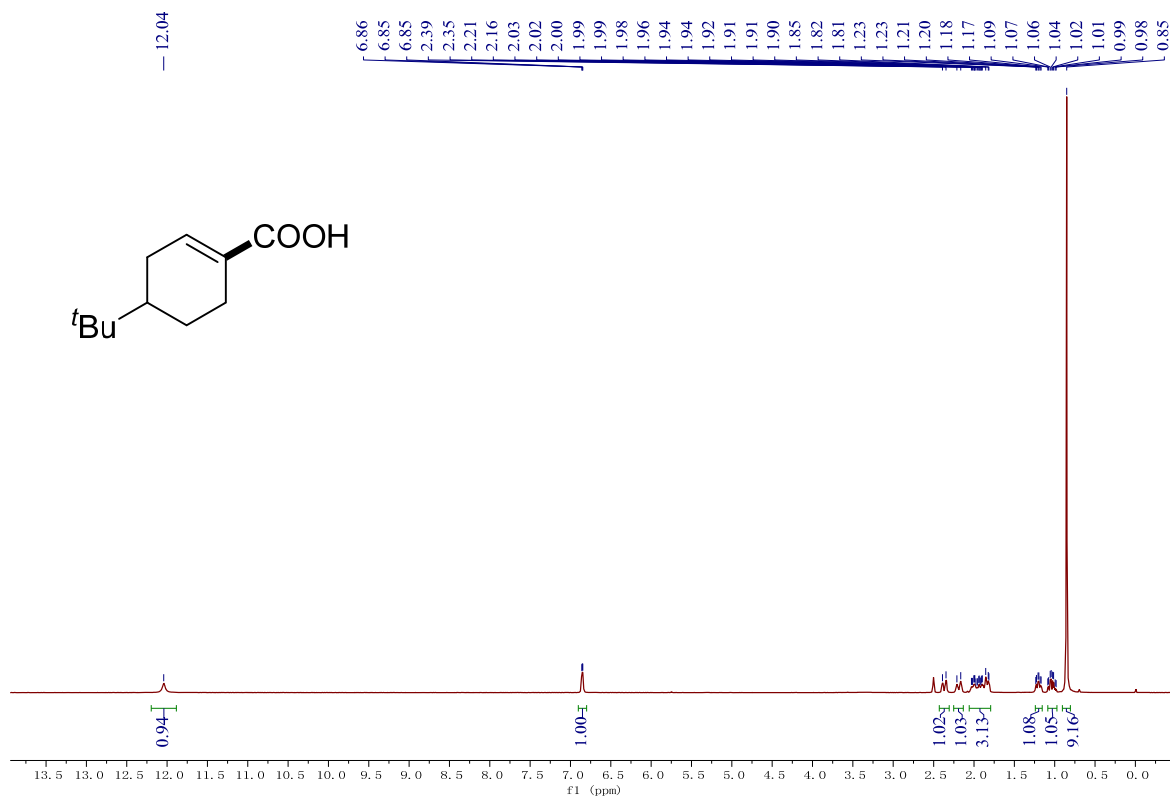

### $^{13}\text{C}$ NMR spectrum of **30**

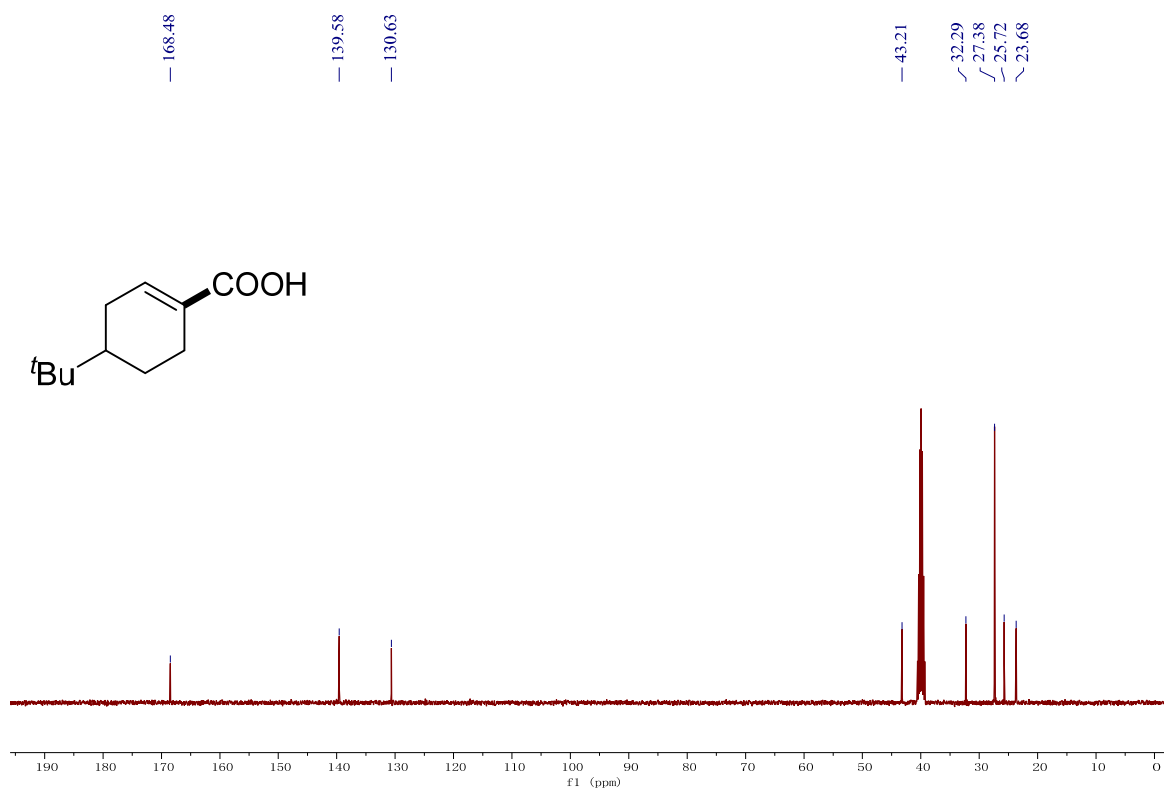

### $^1\text{H}$ NMR spectrum of **31**

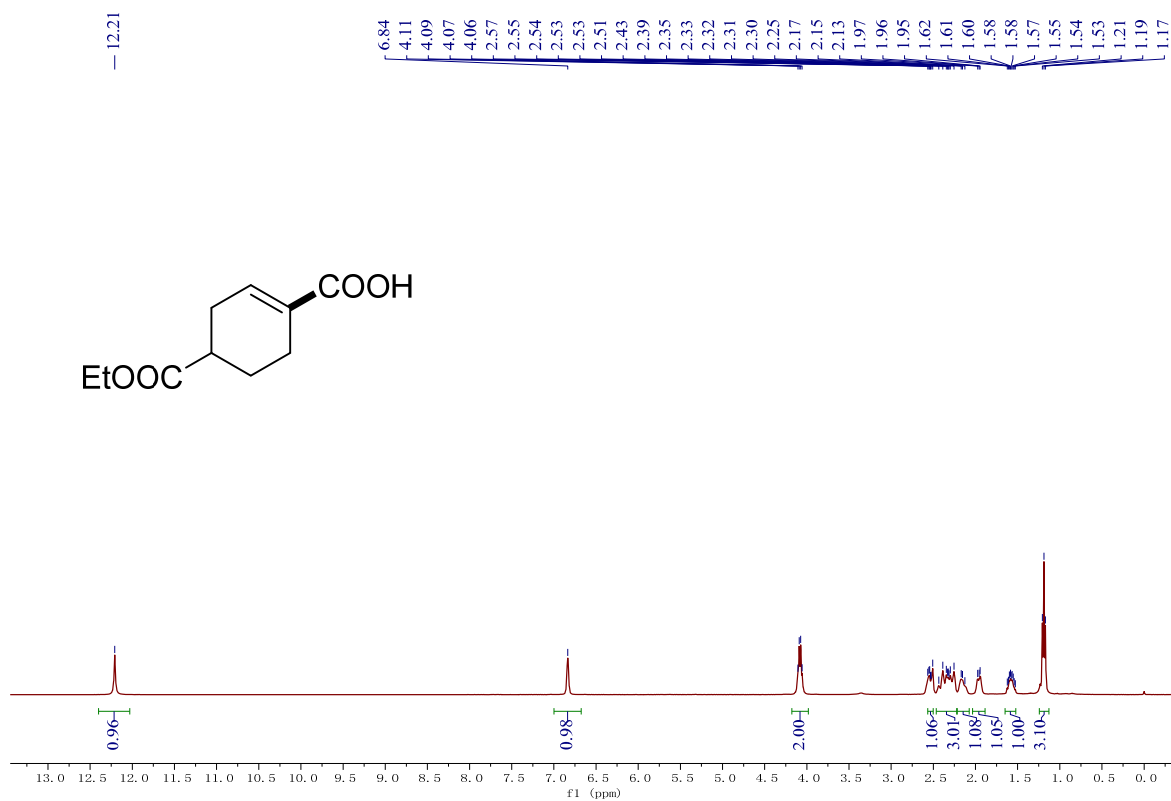



### $^{13}\text{C}$ NMR spectrum of **31**

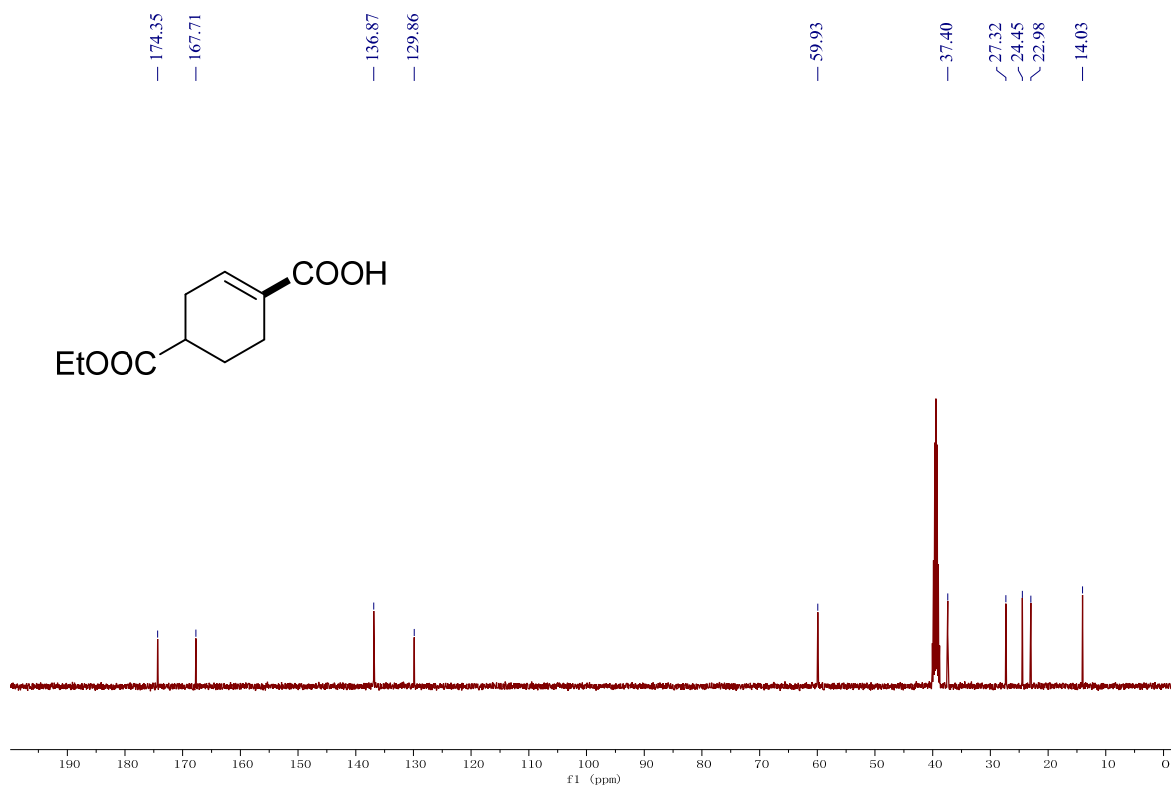

### $^1\text{H}$ NMR spectrum of **32**

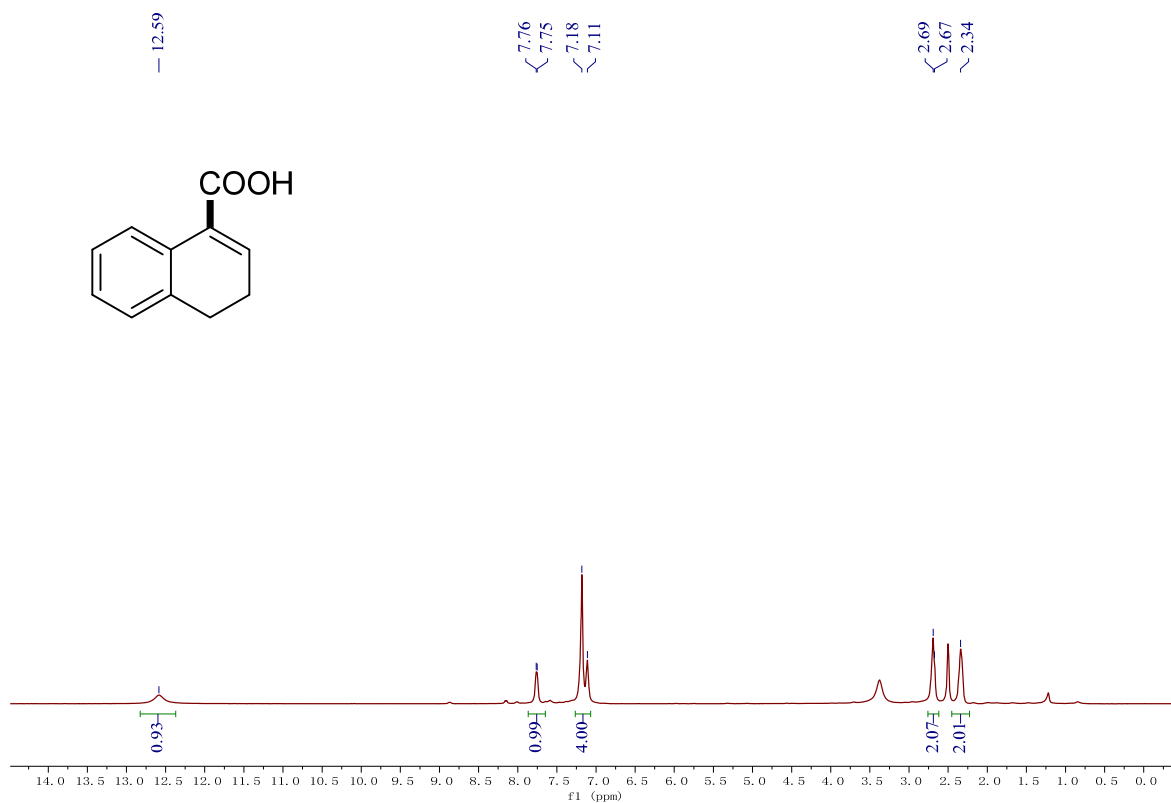

### $^{13}\text{C}$ NMR spectrum of **32**

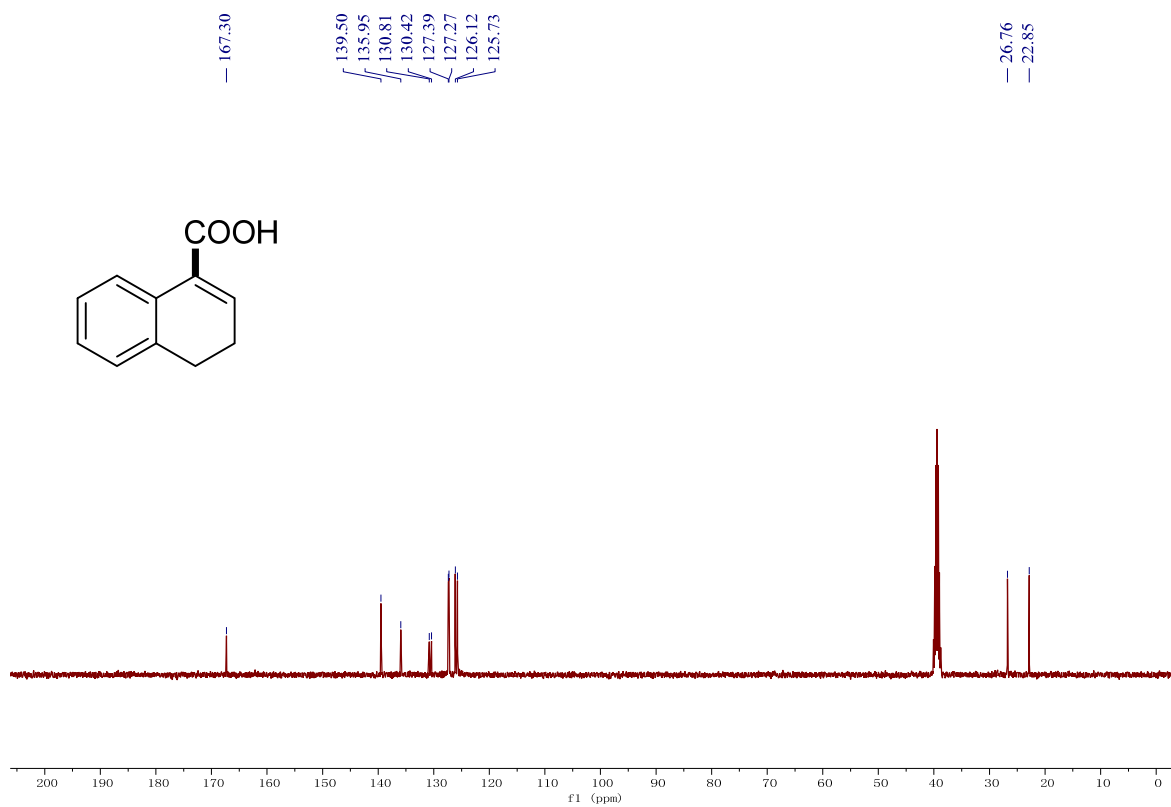

### $^1\text{H}$ NMR spectrum of **33**

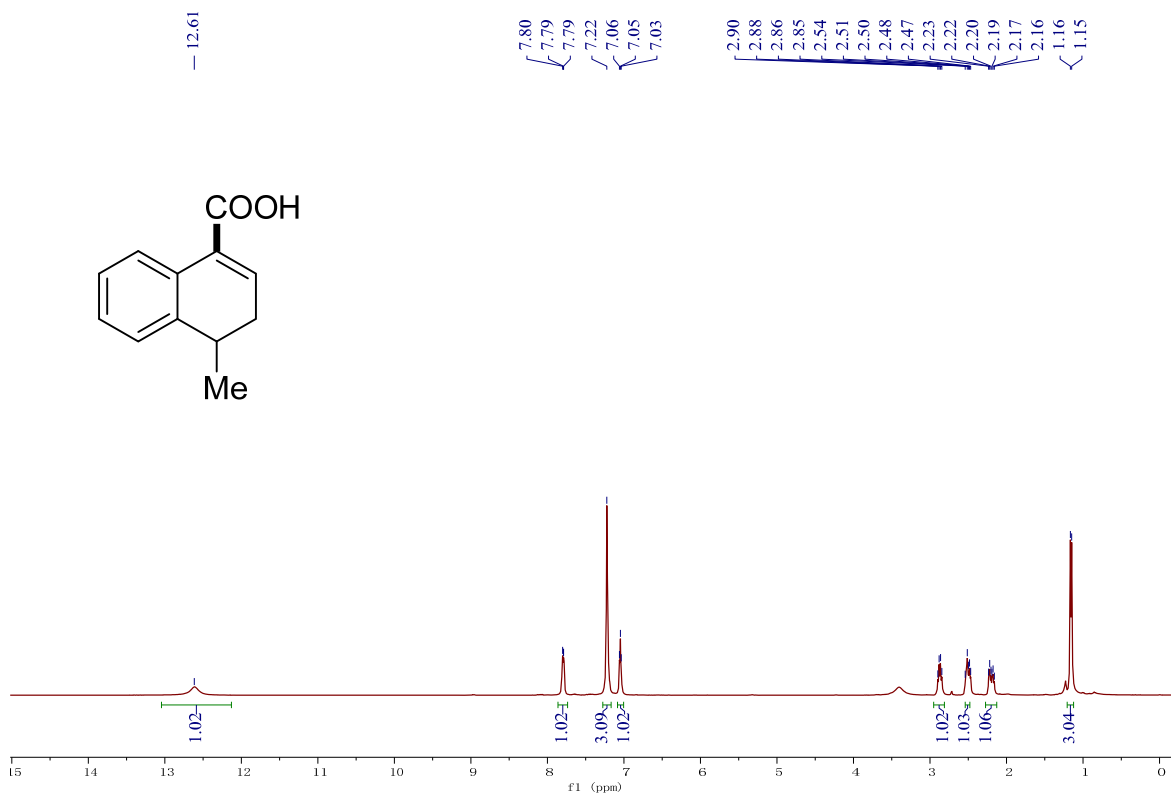

### $^{13}\text{C}$ NMR spectrum of **33**

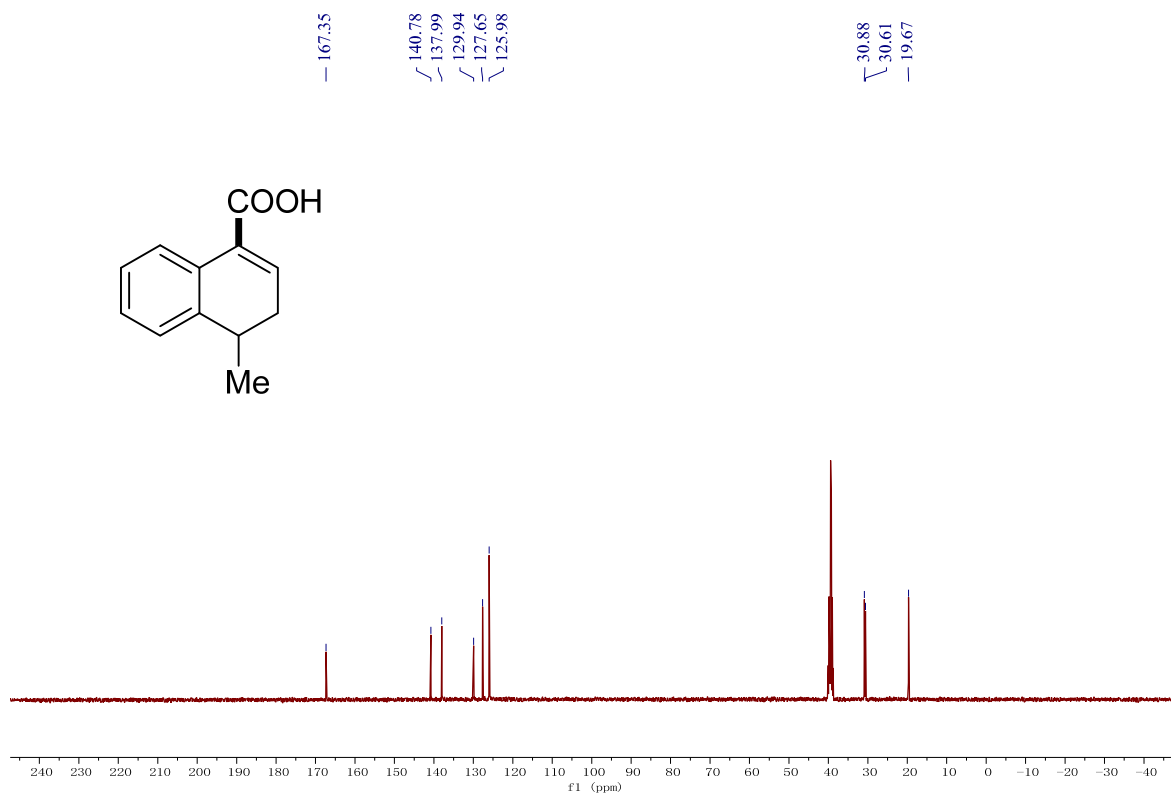

### $^1\text{H}$ NMR spectrum of **34**

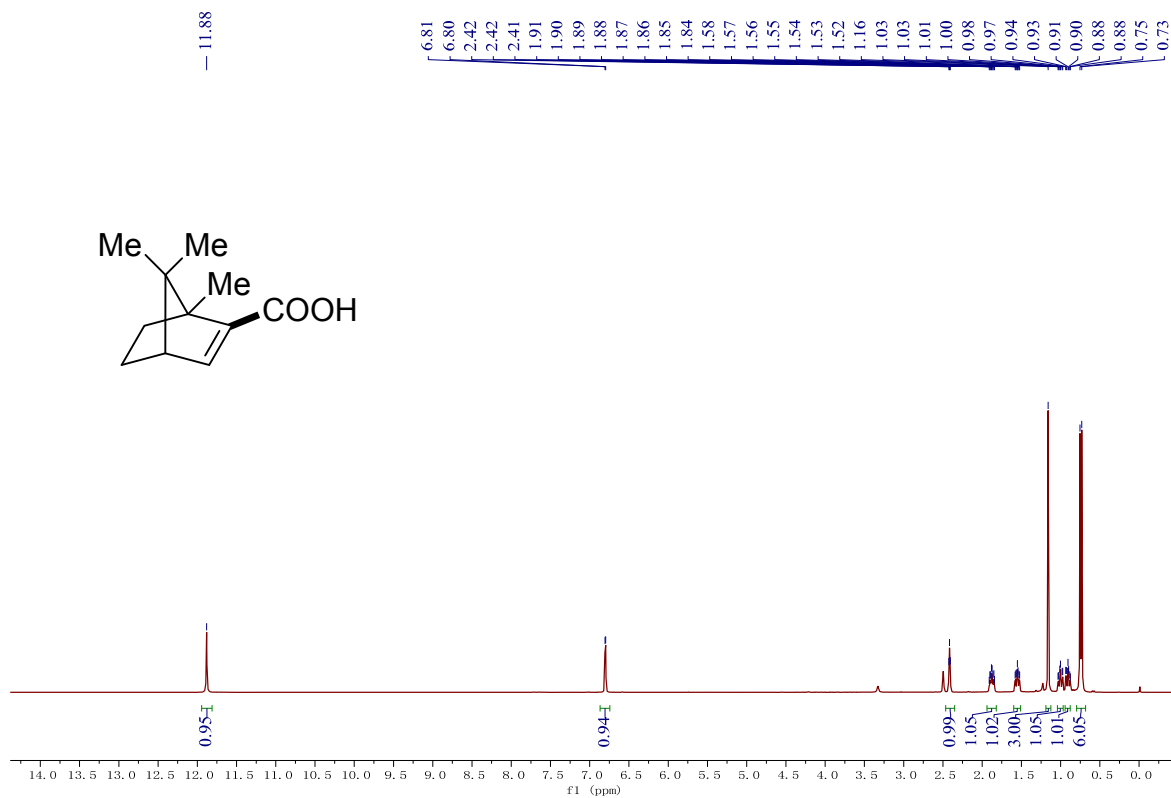

<sup>13</sup>C NMR spectrum of **34**

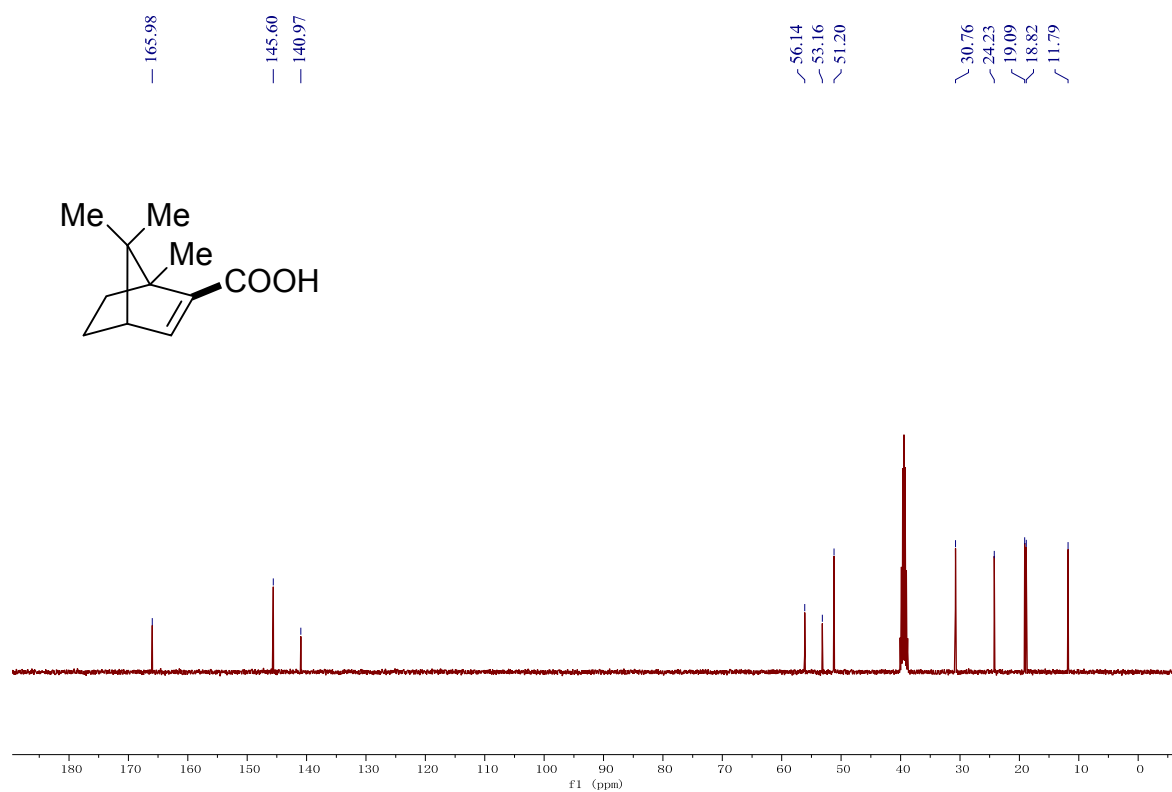

<sup>1</sup>H NMR spectrum of **35**

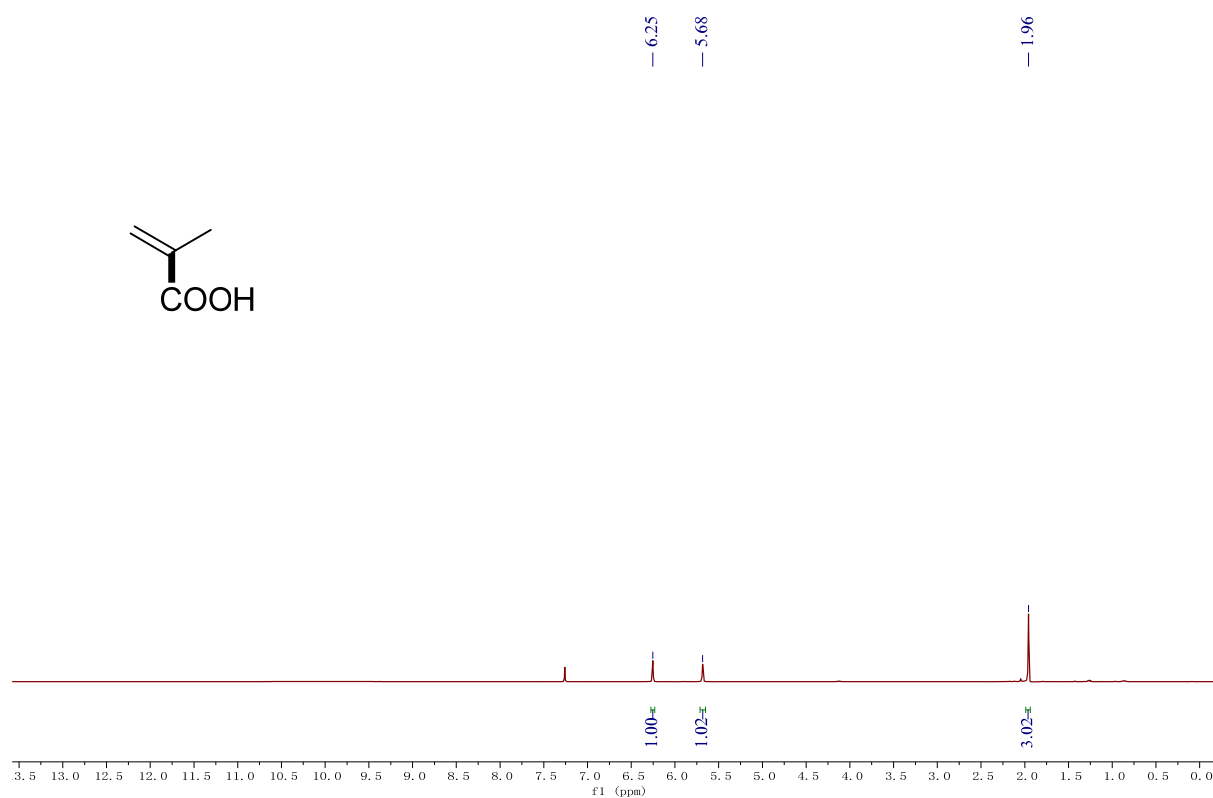

<sup>13</sup>C NMR spectrum of **35**

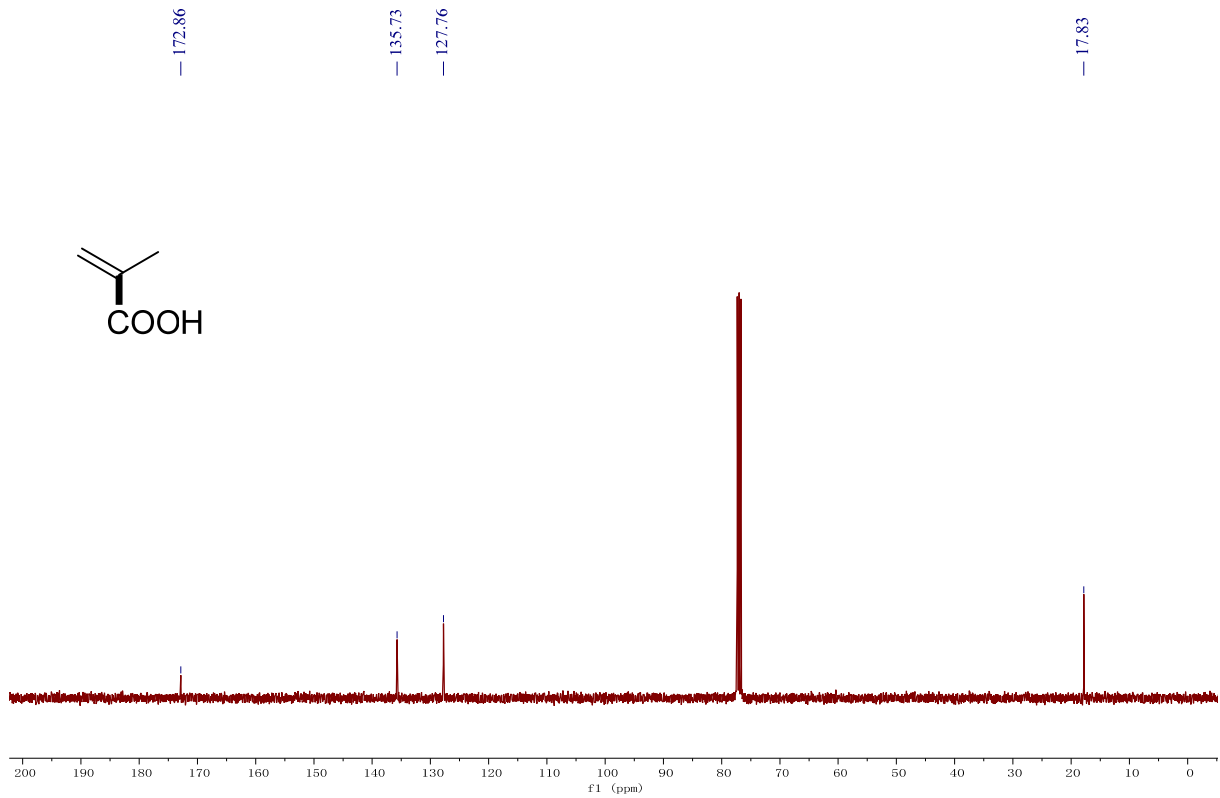

<sup>1</sup>H NMR spectrum of **36**

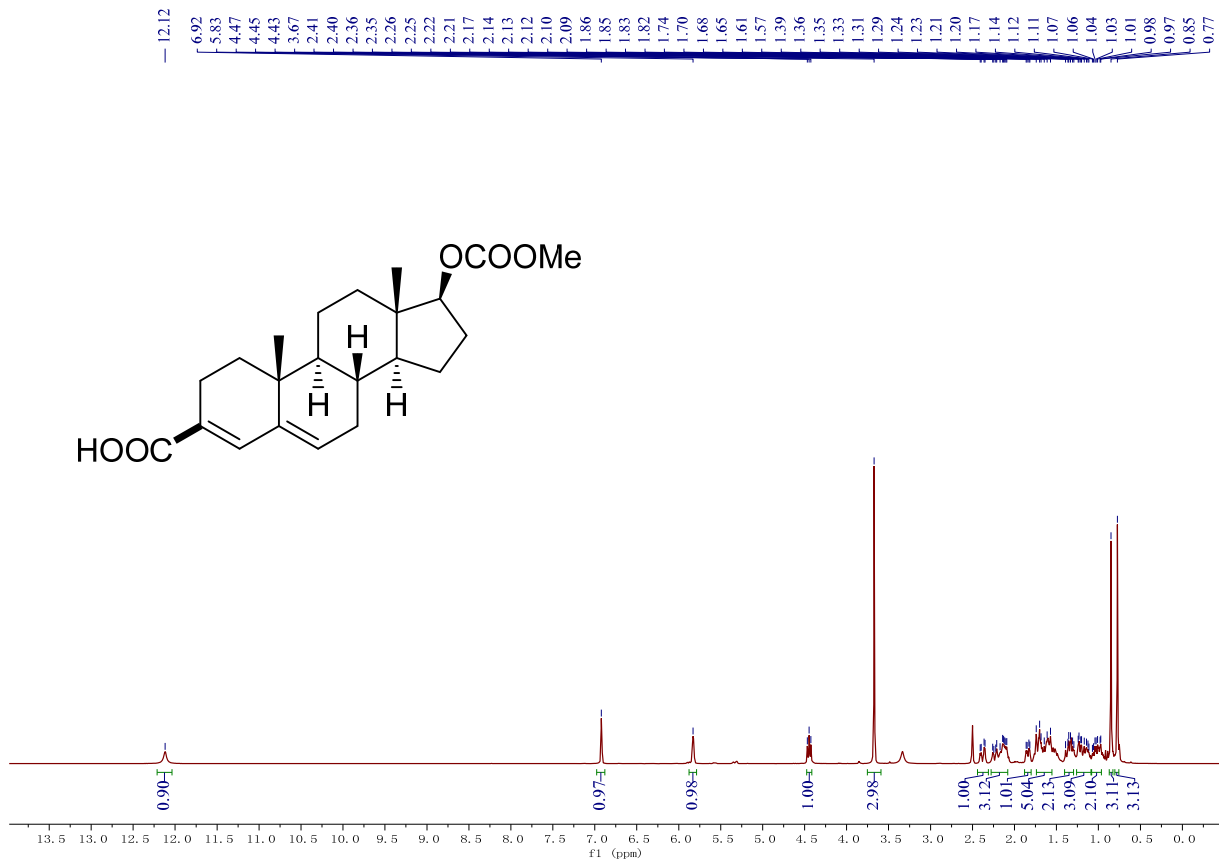

$^{13}\text{C}$  NMR spectrum of **36**

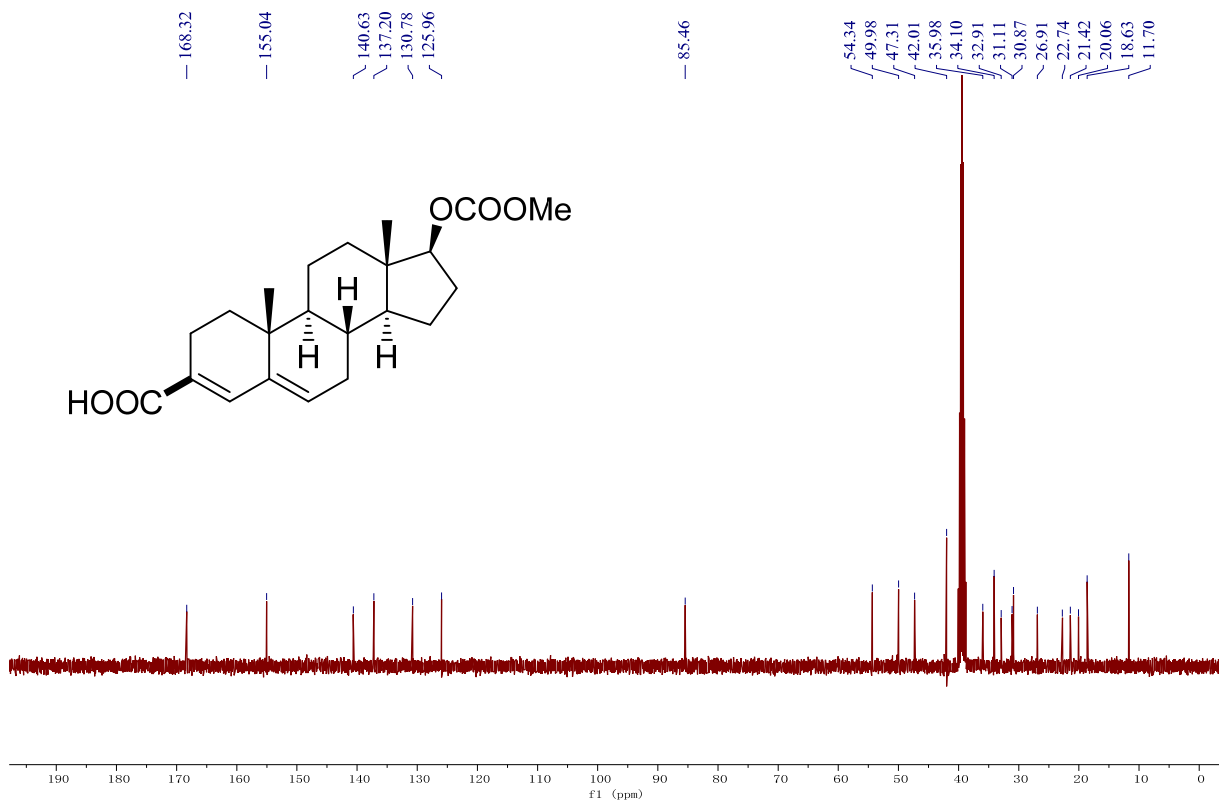

$^1\text{H}$  NMR spectrum of **37**

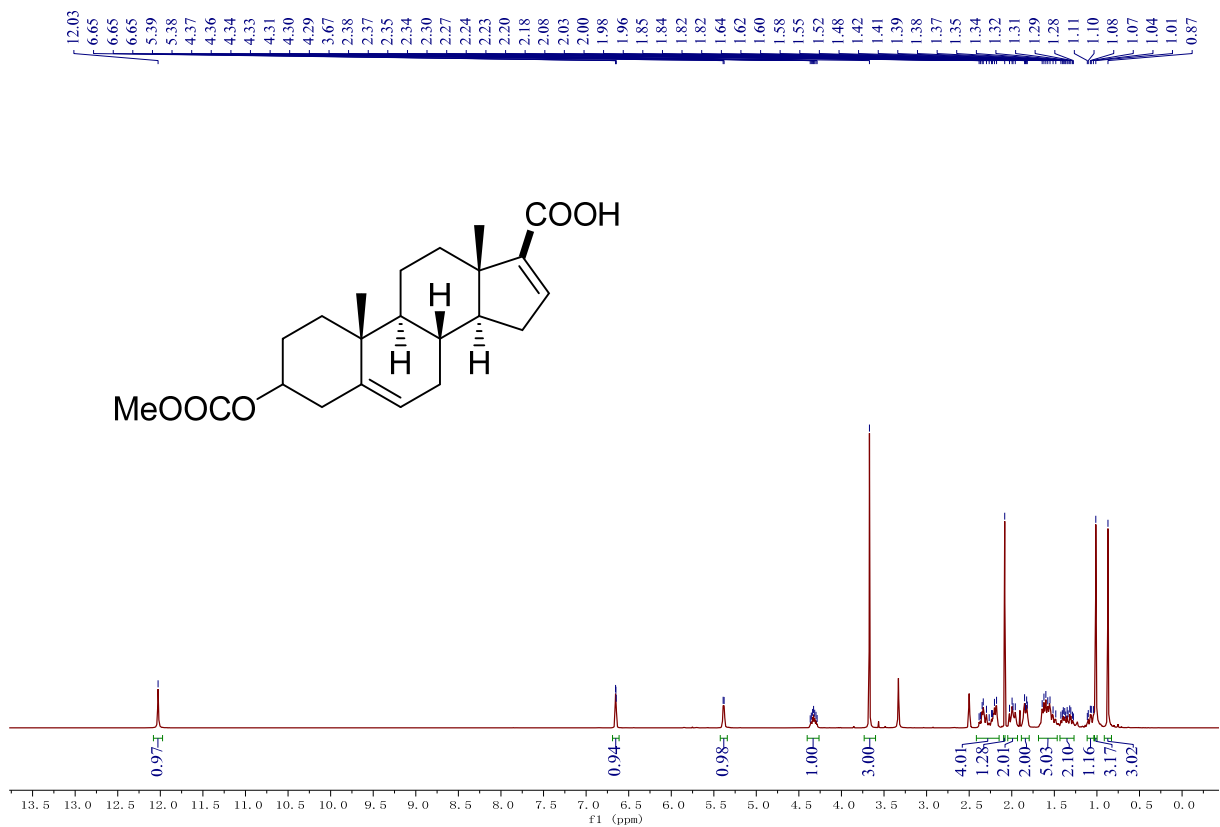

# $^{13}\text{C}$ NMR spectrum of **37**

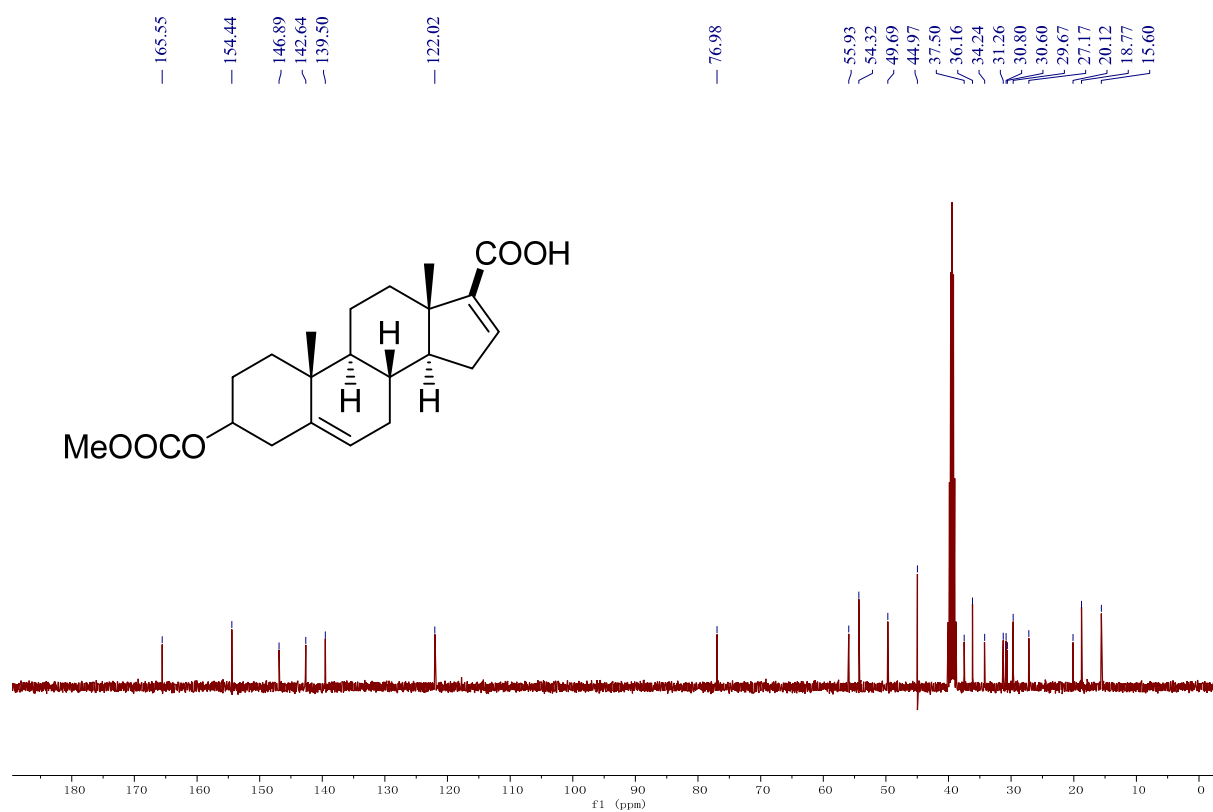

## 10. References:

- (1) T. Fujihara, K. Nogi, T. Xu, J. Terao and Y. Tsuji, *J. Am. Chem. Soc.*, 2012, **134**, 9106.
- (2) J. A. Ross and M. D. Martz, *J. Org. Chem.*, 1964, **29**, 2784.
- (3) X. Zhang, W. -Z. Zhang, L. -L. Shi, C. -X. Guo, L. -L. Zhang and X. -B. Lu, *Chem. Commun.*, 2012, **48**, 6292.
- (4) Y.-N. Wu, M. -C. Fu, R. Shang and Y. Fu, *Chem. Commun.*, 2020, **56**, 4067.
- (5) W. Zheng, C. A. Morales-Rivera, J. W. Lee, P. Liu and M. -Y. Ngai, , *Angew. Chem. Int. Ed.*, 2018, **57**, 9645.
- (6) W. Hang, Y. Yi and C. Xi, *Adv. Synth. Catal.*, 2020, **362**, 2337.
- (7) D. R. Pradhan, S. Pattanaik, J. Kishore and C. Gunanathan, *Org. Lett.*, 2020, **22**, 1852.
- (8) X. -Y. Wang, Z. -P. Shang, G. -F. Zha, X. -Q. Chen, S. N. A. Bukhari and H. -Li. Qin, *Tetrahedron Lett.*, 2016, **57**, 5628.
- (9) Z. Yang, R. Luo, Z. Zhu, X. Yang and W. Tang, *Organometallics*, 2017, **36**, 4095.
- (10) K. Nogi, T. Fujihara, J. Terao and Y. Tsuji, *J. Org. Chem.*, 2015, **80**, 11618.
- (11) M. C. Gossel, R. C. Hayward, *J. Chem. Soc., Perkin Trans. 2*, 1976, 851.
- (12) M. Ouchi, M. Nakano, T. Nakanishi and M. Sawamoto, *Angew. Chem. Int. Ed.* 2016, **55**, 14584.
- (13) (a) A. Leleu, Y. Fort and R. Schneider, *Adv. Synth. Catal.*, 2006, **348**, 1086; (b) G. Cahiez and E. Metais, *Tetrahedron Lett.*, 1995, **36**, 6449.
- (14) A. Krasovskiy and P. Knochel, *Synthesis*, 2006, **2006**, 890.
